# Supplementary material for: The RelA/SpoT Homolog (RSH) Superfamily: Distribution and Functional Evolution of ppGpp Synthetases and Hydrolases across the Tree of Life
Source: PLoS One. 2011 Aug 9;6(8):e23479. doi: 10.1371/journal.pone.0023479 (PMC3153485; doi:10.1371/journal.pone.0023479)
Supplement: Table S2 — Excel file showing the RSH complements of all sampled organisms, organized by taxonomy. (XLS) [file pone.0023479.s006.xls]

## Sheet: Sheet1
Organism	TaxID	Domain	Phylum	Class	Order	Family	Genus	number	RSHs
Acidobacterium_capsulatum_ATCC_51196	240015	Bacteria	Acidobacteria	Acidobacteria (class)	Acidobacteriales	Acidobacteriaceae	Acidobacterium	1	Rel[HS]
Candidatus_Koribacter_versatilis_Ellin345	204669	Bacteria	Acidobacteria	no info	no info	no info	Candidatus Koribacter	4	divRel[S], Rel[HS], Mesh1-L[H], paSpo[H]
Solibacter_usitatus_Ellin6076	234267	Bacteria	Acidobacteria	Solibacteres	Solibacterales	Solibacteraceae	Candidatus Solibacter	1	Rel[HS]
Acidimicrobium_ferrooxidans_DSM_10331	525909	Bacteria	Actinobacteria	Actinobacteria (class)	Acidimicrobiales	Acidimicrobiaceae	Acidimicrobium	1	Rel[HS]
Acidothermus_cellulolyticus_11B	351607	Bacteria	Actinobacteria	Actinobacteria (class)	Actinomycetales	Acidothermaceae	Acidothermus	1	Rel[HS]
Actinosynnema_mirum_DSM_43827	446462	Bacteria	Actinobacteria	Actinobacteria (class)	Actinomycetales	Actinosynnemataceae	Actinosynnema	3	Rel[HS], pbcSpo[H], RelQ[S]
Beutenbergia_cavernae_DSM_12333	471853	Bacteria	Actinobacteria	Actinobacteria (class)	Actinomycetales	Beutenbergiaceae	Beutenbergia	2	Rel[HS], RelQ[S]
Catenulispora_acidiphila_DSM_44928	479433	Bacteria	Actinobacteria	Actinobacteria (class)	Actinomycetales	Catenulisporaceae	Catenulispora	2	Rel[HS], Rel[H]
Corynebacterium_aurimucosum_ATCC_700975	548476	Bacteria	Actinobacteria	Actinobacteria (class)	Actinomycetales	Corynebacteriaceae	Corynebacterium	3	actRel[S], divRel[S], Rel[HS]
Corynebacterium_diphtheriae	1717	Bacteria	Actinobacteria	Actinobacteria (class)	Actinomycetales	Corynebacteriaceae	Corynebacterium	3	actRel[S], Rel[HS], Mesh1-L[H]
Corynebacterium_efficiens_YS-314	196164	Bacteria	Actinobacteria	Actinobacteria (class)	Actinomycetales	Corynebacteriaceae	Corynebacterium	3	actRel[S], Rel[HS], Mesh1-L[H]
Corynebacterium_glutamicum_ATCC_13032_Bielefeld	1716	Bacteria	Actinobacteria	Actinobacteria (class)	Actinomycetales	Corynebacteriaceae	Corynebacterium	4	actRel[S], Rel[HS], Mesh1-L[H], RelQ[S]
Corynebacterium_glutamicum_ATCC_13032_Kitasato	1716	Bacteria	Actinobacteria	Actinobacteria (class)	Actinomycetales	Corynebacteriaceae	Corynebacterium	4	actRel[S], Rel[HS], Mesh1-L[H], RelQ[S]
Corynebacterium_glutamicum_R	340322	Bacteria	Actinobacteria	Actinobacteria (class)	Actinomycetales	Corynebacteriaceae	Corynebacterium	4	actRel[S], Rel[HS], Mesh1-L[H], RelQ[S]
Corynebacterium_jeikeium_K411	306537	Bacteria	Actinobacteria	Actinobacteria (class)	Actinomycetales	Corynebacteriaceae	Corynebacterium	3	actRel[S], Rel[HS], Mesh1-L[H]
Corynebacterium_kroppenstedtii_DSM_44385	645127	Bacteria	Actinobacteria	Actinobacteria (class)	Actinomycetales	Corynebacteriaceae	Corynebacterium	2	actRel[S], Rel[HS]
Corynebacterium_urealyticum_DSM_7109	504474	Bacteria	Actinobacteria	Actinobacteria (class)	Actinomycetales	Corynebacteriaceae	Corynebacterium	2	actRel[S], Rel[HS]
Brachybacterium_faecium_DSM_4810	446465	Bacteria	Actinobacteria	Actinobacteria (class)	Actinomycetales	Dermabacteraceae	Brachybacterium	3	actRel[S], Rel[HS], RelQ[S]
Kytococcus_sedentarius_DSM_20547	478801	Bacteria	Actinobacteria	Actinobacteria (class)	Actinomycetales	Dermacoccaceae	Kytococcus	2	Rel[HS], RelQ[S]
Frankia_alni_ACN14a	326424	Bacteria	Actinobacteria	Actinobacteria (class)	Actinomycetales	Frankiaceae	Frankia	3	Rel[HS], pbcSpo[H], RshA[HS]
Frankia_CcI3	1854	Bacteria	Actinobacteria	Actinobacteria (class)	Actinomycetales	Frankiaceae	Frankia	3	Rel[HS], pbcSpo[H], RshA[HS]
Frankia_EAN1pec	1854	Bacteria	Actinobacteria	Actinobacteria (class)	Actinomycetales	Frankiaceae	Frankia	3	Rel[HS], RshA[HS], pbcSpo[H]
Gordonia_bronchialis_DSM_43247	526226	Bacteria	Actinobacteria	Actinobacteria (class)	Actinomycetales	Gordoniaceae	Gordonia	1	Rel[HS]
Jonesia_denitrificans_DSM_20603	471856	Bacteria	Actinobacteria	Actinobacteria (class)	Actinomycetales	Jonesiaceae	Jonesia	2	Rel[HS], RelQ[S]
Kineococcus_radiotolerans_SRS30216	266940	Bacteria	Actinobacteria	Actinobacteria (class)	Actinomycetales	Kineosporiaceae	Kineococcus	1	Rel[HS]
Clavibacter_michiganensis_NCPPB_382	1573	Bacteria	Actinobacteria	Actinobacteria (class)	Actinomycetales	Microbacteriaceae	Clavibacter	2	divRel[S], Rel[HS]
Clavibacter_michiganensis_sepedonicus	1573	Bacteria	Actinobacteria	Actinobacteria (class)	Actinomycetales	Microbacteriaceae	Clavibacter	3	divRel[S], Rel[HS], pbcSpo[H]
Leifsonia_xyli_xyli_CTCB0	110932	Bacteria	Actinobacteria	Actinobacteria (class)	Actinomycetales	Microbacteriaceae	Leifsonia	2	Rel[HS], RelQ[S]
Arthrobacter_aurescens_TC1	290340	Bacteria	Actinobacteria	Actinobacteria (class)	Actinomycetales	Micrococcaceae	Arthrobacter	2	actRel[S], Rel[HS]
Arthrobacter_chlorophenolicus_A6	452863	Bacteria	Actinobacteria	Actinobacteria (class)	Actinomycetales	Micrococcaceae	Arthrobacter	2	actRel[S], Rel[HS]
Arthrobacter_FB24	1663	Bacteria	Actinobacteria	Actinobacteria (class)	Actinomycetales	Micrococcaceae	Arthrobacter	3	actRel[S], Rel[HS], pbcSpo[H]
Kocuria_rhizophila_DC2201	378753	Bacteria	Actinobacteria	Actinobacteria (class)	Actinomycetales	Micrococcaceae	Kocuria	2	Rel[HS], pbcSpo[H]
Micrococcus_luteus_NCTC_2665	465515	Bacteria	Actinobacteria	Actinobacteria (class)	Actinomycetales	Micrococcaceae	Micrococcus	2	Rel[HS], RelQ[S]
Renibacterium_salmoninarum_ATCC_33209	288705	Bacteria	Actinobacteria	Actinobacteria (class)	Actinomycetales	Micrococcaceae	Renibacterium	2	actRel[S], Rel[HS]
Salinispora_arenicola_CNS-205	391037	Bacteria	Actinobacteria	Actinobacteria (class)	Actinomycetales	Micromonosporaceae	Salinispora	2	Rel[HS], RshA[HS]
Salinispora_tropica_CNB-440	369723	Bacteria	Actinobacteria	Actinobacteria (class)	Actinomycetales	Micromonosporaceae	Salinispora	2	Rel[HS], RshA[HS]
Mycobacterium_abscessus_ATCC_19977T	1763	Bacteria	Actinobacteria	Actinobacteria (class)	Actinomycetales	Mycobacteriaceae	Mycobacterium	1	Rel[HS]
Mycobacterium_avium_104	243243	Bacteria	Actinobacteria	Actinobacteria (class)	Actinomycetales	Mycobacteriaceae	Mycobacterium	1	Rel[HS]
Mycobacterium_avium_paratuberculosis	1770	Bacteria	Actinobacteria	Actinobacteria (class)	Actinomycetales	Mycobacteriaceae	Mycobacterium	1	Rel[HS]
Mycobacterium_bovis	1765	Bacteria	Actinobacteria	Actinobacteria (class)	Actinomycetales	Mycobacteriaceae	Mycobacterium	2	divRel[S], Rel[HS]
Mycobacterium_bovis_BCG_Pasteur_1173P2	410289	Bacteria	Actinobacteria	Actinobacteria (class)	Actinomycetales	Mycobacteriaceae	Mycobacterium	2	divRel[S], Rel[HS]
Mycobacterium_bovis_BCG_Tokyo_172	561275	Bacteria	Actinobacteria	Actinobacteria (class)	Actinomycetales	Mycobacteriaceae	Mycobacterium	2	divRel[S], Rel[HS]
Mycobacterium_gilvum_PYR-GCK	350054	Bacteria	Actinobacteria	Actinobacteria (class)	Actinomycetales	Mycobacteriaceae	Mycobacterium	2	actRel[S], Rel[HS]
Mycobacterium_JLS	1763	Bacteria	Actinobacteria	Actinobacteria (class)	Actinomycetales	Mycobacteriaceae	Mycobacterium	2	Rel[HS], Mesh1-L[H]
Mycobacterium_KMS	1763	Bacteria	Actinobacteria	Actinobacteria (class)	Actinomycetales	Mycobacteriaceae	Mycobacterium	2	Rel[HS], Mesh1-L[H]
Mycobacterium_leprae	1769	Bacteria	Actinobacteria	Actinobacteria (class)	Actinomycetales	Mycobacteriaceae	Mycobacterium	1	Rel[HS]
Mycobacterium_leprae_Br4923	561304	Bacteria	Actinobacteria	Actinobacteria (class)	Actinomycetales	Mycobacteriaceae	Mycobacterium	1	Rel[HS]
Mycobacterium_marinum_M	216594	Bacteria	Actinobacteria	Actinobacteria (class)	Actinomycetales	Mycobacteriaceae	Mycobacterium	2	Rel[HS], pbcSpo[H]
Mycobacterium_MCS	1763	Bacteria	Actinobacteria	Actinobacteria (class)	Actinomycetales	Mycobacteriaceae	Mycobacterium	2	Rel[HS], Mesh1-L[H]
Mycobacterium_smegmatis_MC2_155	246196	Bacteria	Actinobacteria	Actinobacteria (class)	Actinomycetales	Mycobacteriaceae	Mycobacterium	2	actRel[S], Rel[HS]
Mycobacterium_tuberculosis_CDC1551	83331	Bacteria	Actinobacteria	Actinobacteria (class)	Actinomycetales	Mycobacteriaceae	Mycobacterium	2	divRel[S], Rel[HS]
Mycobacterium_tuberculosis_F11	336982	Bacteria	Actinobacteria	Actinobacteria (class)	Actinomycetales	Mycobacteriaceae	Mycobacterium	2	divRel[S], Rel[HS]
Mycobacterium_tuberculosis_H37Ra	419947	Bacteria	Actinobacteria	Actinobacteria (class)	Actinomycetales	Mycobacteriaceae	Mycobacterium	2	divRel[S], Rel[HS]
Mycobacterium_tuberculosis_H37Rv	83332	Bacteria	Actinobacteria	Actinobacteria (class)	Actinomycetales	Mycobacteriaceae	Mycobacterium	2	divRel[S], Rel[HS]
Mycobacterium_tuberculosis_KZN_1435	478434	Bacteria	Actinobacteria	Actinobacteria (class)	Actinomycetales	Mycobacteriaceae	Mycobacterium	2	divRel[S], Rel[HS]
Mycobacterium_ulcerans_Agy99	362242	Bacteria	Actinobacteria	Actinobacteria (class)	Actinomycetales	Mycobacteriaceae	Mycobacterium	2	Rel[HS], pbcSpo[H]
Mycobacterium_vanbaalenii_PYR-1	350058	Bacteria	Actinobacteria	Actinobacteria (class)	Actinomycetales	Mycobacteriaceae	Mycobacterium	3	actRel[S], Rel[HS], Mesh1-L[H]
Nakamurella_multipartita_DSM_44233	479431	Bacteria	Actinobacteria	Actinobacteria (class)	Actinomycetales	Nakamurellaceae	Nakamurella	1	Rel[HS]
Tropheryma_whipplei_TW08_27	2038	Bacteria	Actinobacteria	Actinobacteria (class)	Actinomycetales	no info	Tropheryma no info	1	Rel[HS]
Tropheryma_whipplei_Twist	203267	Bacteria	Actinobacteria	Actinobacteria (class)	Actinomycetales	no info	Tropheryma	1	Rel[HS]
Nocardia_farcinica_IFM10152	1817	Bacteria	Actinobacteria	Actinobacteria (class)	Actinomycetales	Nocardiaceae	Nocardia	2	Rel[HS], RelQ[S]
Rhodococcus_erythropolis_PR4	234621	Bacteria	Actinobacteria	Actinobacteria (class)	Actinomycetales	Nocardiaceae	Rhodococcus	3	Rel[HS], Mesh1-L[H], RelQ[S]
Rhodococcus_jostii_RHA1	101510	Bacteria	Actinobacteria	Actinobacteria (class)	Actinomycetales	Nocardiaceae	Rhodococcus	2	Rel[HS], RelQ[S]
Rhodococcus_opacus_B4	632772	Bacteria	Actinobacteria	Actinobacteria (class)	Actinomycetales	Nocardiaceae	Rhodococcus	2	Rel[HS], RelQ[S]
Nocardioides_JS614	1839	Bacteria	Actinobacteria	Actinobacteria (class)	Actinomycetales	Nocardioidaceae	Nocardioides	4	actRel[S], Rel[HS], RelQ[S], RelQ[S]
Thermobifida_fusca_YX	269800	Bacteria	Actinobacteria	Actinobacteria (class)	Actinomycetales	Nocardiopsaceae	Thermobifida	1	Rel[HS]
Propionibacterium_acnes_KPA171202	267747	Bacteria	Actinobacteria	Actinobacteria (class)	Actinomycetales	Propionibacteriaceae	Propionibacterium	1	Rel[HS]
Saccharomonospora_viridis_DSM_43017	471857	Bacteria	Actinobacteria	Actinobacteria (class)	Actinomycetales	Pseudonocardiaceae	Saccharomonospora	1	Rel[HS]
Saccharopolyspora_erythraea_NRRL_2338	405948	Bacteria	Actinobacteria	Actinobacteria (class)	Actinomycetales	Pseudonocardiaceae	Saccharopolyspora	2	Rel[HS], pbcSpo[H]
Streptomyces_avermitilis	33903	Bacteria	Actinobacteria	Actinobacteria (class)	Actinomycetales	Streptomycetaceae	Streptomyces	3	Rel[HS], pbcSpo[H], RshA[HS]
Streptomyces_coelicolor	1902	Bacteria	Actinobacteria	Actinobacteria (class)	Actinomycetales	Streptomycetaceae	Streptomyces	4	Rel[HS], pbcSpo[H], capRel[S], RshA[HS]
Streptomyces_griseus_NBRC_13350	1883	Bacteria	Actinobacteria	Actinobacteria (class)	Actinomycetales	Streptomycetaceae	Streptomyces	3	Rel[HS], pbcSpo[H], RshA[HS]
Bifidobacterium_adolescentis_ATCC_15703	367928	Bacteria	Actinobacteria	Actinobacteria (class)	Bifidobacteriales	Bifidobacteriaceae	Bifidobacterium	2	Rel[HS], RelQ[S]
Bifidobacterium_animalis_lactis_AD011	1678	Bacteria	Actinobacteria	Actinobacteria (class)	Bifidobacteriales	Bifidobacteriaceae	Bifidobacterium	2	Rel[HS], RelQ[S]
Bifidobacterium_animalis_lactis_Bl_04	1678	Bacteria	Actinobacteria	Actinobacteria (class)	Bifidobacteriales	Bifidobacteriaceae	Bifidobacterium	2	Rel[HS], RelQ[S]
Bifidobacterium_animalis_lactis_DSM_10140	1678	Bacteria	Actinobacteria	Actinobacteria (class)	Bifidobacteriales	Bifidobacteriaceae	Bifidobacterium	2	Rel[HS], RelQ[S]
Bifidobacterium_longum	216816	Bacteria	Actinobacteria	Actinobacteria (class)	Bifidobacteriales	Bifidobacteriaceae	Bifidobacterium	2	Rel[HS], RelQ[S]
Bifidobacterium_longum_DJO10A	205913	Bacteria	Actinobacteria	Actinobacteria (class)	Bifidobacteriales	Bifidobacteriaceae	Bifidobacterium	2	Rel[HS], RelQ[S]
Bifidobacterium_longum_infantis_ATCC_15697	1678	Bacteria	Actinobacteria	Actinobacteria (class)	Bifidobacteriales	Bifidobacteriaceae	Bifidobacterium	2	Rel[HS], RelQ[S]
Atopobium_parvulum_DSM_20469	521095	Bacteria	Actinobacteria	Actinobacteria (class)	Coriobacteriales	Coriobacteriaceae	Atopobium	1	Rel[HS]
Cryptobacterium_curtum_DSM_15641	469378	Bacteria	Actinobacteria	Actinobacteria (class)	Coriobacteriales	Coriobacteriaceae	Cryptobacterium	2	Rel[HS], Mesh1-L[H]
Eggerthella_lenta_DSM_2243	479437	Bacteria	Actinobacteria	Actinobacteria (class)	Coriobacteriales	Coriobacteriaceae	Eggerthella	2	Rel[HS], RelQ[S]
Slackia_heliotrinireducens_DSM_20476	471855	Bacteria	Actinobacteria	Actinobacteria (class)	Coriobacteriales	Coriobacteriaceae	Slackia	3	Rel[HS], pbcSpo[H], RelQ[S]
Rubrobacter_xylanophilus_DSM_9941	266117	Bacteria	Actinobacteria	Actinobacteria (class)	Rubrobacterales	Rubrobacteraceae	Rubrobacter	1	Rel[HS]
Aquifex_aeolicus	63363	Bacteria	Aquificae	Aquificae (class)	Aquificales	Aquificaceae	Aquifex	1	Rel[HS]
Hydrogenobaculum_Y04AAS1	168657	Bacteria	Aquificae	Aquificae (class)	Aquificales	Aquificaceae	Hydrogenobaculum	1	Rel[HS]
Persephonella_marina_EX_H1	123214	Bacteria	Aquificae	Aquificae (class)	Aquificales	Hydrogenothermaceae	Persephonella	1	Rel[HS]
Sulfurihydrogenibium_azorense_Az_Fu1	204536	Bacteria	Aquificae	Aquificae (class)	Aquificales	Hydrogenothermaceae	Sulfurihydrogenibium	1	Rel[HS]
Sulfurihydrogenibium_YO3AOP1	212790	Bacteria	Aquificae	Aquificae (class)	Aquificales	Hydrogenothermaceae	Sulfurihydrogenibium	1	Rel[HS]
Bacteroides_fragilis_NCTC_9434	816	Bacteria	Bacteroidetes	Bacteroidia	Bacteroidales	Bacteroidaceae	Bacteroides	2	Rel[HS], RshB[HS]
Bacteroides_fragilis_YCH46	295405	Bacteria	Bacteroidetes	Bacteroidia	Bacteroidales	Bacteroidaceae	Bacteroides	2	Rel[HS], RshB[HS]
Bacteroides_thetaiotaomicron_VPI-5482	226186	Bacteria	Bacteroidetes	Bacteroidia	Bacteroidales	Bacteroidaceae	Bacteroides	2	Rel[HS], RshB[HS]
Bacteroides_vulgatus_ATCC_8482	435590	Bacteria	Bacteroidetes	Bacteroidia	Bacteroidales	Bacteroidaceae	Bacteroides	2	Rel[HS], RshB[HS]
Candidatus_Azobacteroides_pseudotrichonymphae_genomovar__CFP2	511995	Bacteria	Bacteroidetes	Bacteroidia	Bacteroidales	no info	Candidatus Azobacteroides	1	Rel[HS]
Parabacteroides_distasonis_ATCC_8503	435591	Bacteria	Bacteroidetes	Bacteroidia	Bacteroidales	Porphyromonadaceae	Parabacteroides	2	Rel[HS], RshB[HS]
Porphyromonas_gingivalis_ATCC_33277	431947	Bacteria	Bacteroidetes	Bacteroidia	Bacteroidales	Porphyromonadaceae	Porphyromonas	2	Rel[HS], RshB[HS]
Porphyromonas_gingivalis_W83	242619	Bacteria	Bacteroidetes	Bacteroidia	Bacteroidales	Porphyromonadaceae	Porphyromonas	3	divRel[S], Rel[HS], RshB[HS]
Cytophaga_hutchinsonii_ATCC_33406	269798	Bacteria	Bacteroidetes	Cytophagia	Cytophagales	Cytophagaceae	Cytophaga	2	Rel[HS], pbcSpo2[H]
Dyadobacter_fermentans_DSM_18053	471854	Bacteria	Bacteroidetes	Cytophagia	Cytophagales	Cytophagaceae	Dyadobacter	2	Rel[HS], paSpo[H]
Blattabacterium__Blattella_germanica__Bge	34098	Bacteria	Bacteroidetes	Flavobacteria	Flavobacteriales	Blattabacteriaceae	Bifidobacterium	0
Blattabacterium__Periplaneta_americana__BPLAN	34098	Bacteria	Bacteroidetes	Flavobacteria	Flavobacteriales	Blattabacteriaceae	Bifidobacterium	0
Capnocytophaga_ochracea_DSM_7271	521097	Bacteria	Bacteroidetes	Flavobacteria	Flavobacteriales	Flavobacteriaceae	Capnocytophaga	1	Rel[HS]
Flavobacteriaceae_bacterium_3519_10	531844	Bacteria	Bacteroidetes	Flavobacteria	Flavobacteriales	Flavobacteriaceae	Flavobacteriaceae bacterium	2	Rel[HS], paSpo[H]
Flavobacterium_johnsoniae_UW101	376686	Bacteria	Bacteroidetes	Flavobacteria	Flavobacteriales	Flavobacteriaceae	Flavobacterium	2	Rel[HS], pbcSpo2[H]
Flavobacterium_psychrophilum_JIP02_86	237	Bacteria	Bacteroidetes	Flavobacteria	Flavobacteriales	Flavobacteriaceae	Flavobacterium	1	Rel[HS]
Gramella_forsetii_KT0803	411154	Bacteria	Bacteroidetes	Flavobacteria	Flavobacteriales	Flavobacteriaceae	Gramella	1	Rel[HS]
Robiginitalea_biformata_HTCC2501	313596	Bacteria	Bacteroidetes	Flavobacteria	Flavobacteriales	Flavobacteriaceae	Robiginitalea	1	Rel[HS]
Candidatus_Sulcia_muelleri_GWSS	444179	Bacteria	Bacteroidetes	Flavobacteria	Flavobacteriales	no info	Candidatus Sulcia	0
Candidatus_Sulcia_muelleri_SMDSEM	595499	Bacteria	Bacteroidetes	Flavobacteria	Flavobacteriales	no info	Candidatus Sulcia	0
Candidatus_Amoebophilus_asiaticus_5a2	452471	Bacteria	Bacteroidetes	no info	no info	no info	Candidatus Amoebophilus	15	Rel[HS]†, rickSpo[H], rickSpo[H], rickSpo[H], rickSpo[H], rickSpo[H], rickSpo[H], rickSpo[H], rickSpo[H], rickSpo[H], rickSpo[H], rickSpo[H], rickSpo[H], rickSpo[H], rickSpo[H]
Chitinophaga_pinensis_DSM_2588	485918	Bacteria	Bacteroidetes	Sphingobacteria	Sphingobacteriales	no info	Chitinophaga	4	Rel[HS], pbcSpo2[H], pbcSpo[H], paSpo[H]
Rhodothermus_marinus_DSM_4252	518766	Bacteria	Bacteroidetes	Sphingobacteria	Sphingobacteriales	Rhodothermaceae	Rhodothermus	2	Rel[HS], Mesh1-L[H]
Salinibacter_ruber_DSM_13855	309807	Bacteria	Bacteroidetes	Sphingobacteria	Sphingobacteriales	Rhodothermaceae	Salinibacter	3	Rel[HS], pbcSpo[H], Mesh1-L[H]
Pedobacter_heparinus_DSM_2366	485917	Bacteria	Bacteroidetes	Sphingobacteria	Sphingobacteriales	Sphingobacteriaceae	Pedobacter	1	Rel[HS]
Chlamydia_muridarum	83560	Bacteria	Chlamydiae	Chlamydiae (class)	Chlamydiales	Chlamydiaceae	Chlamydia	0
Chlamydia_trachomatis_434_Bu	810	Bacteria	Chlamydiae	Chlamydiae (class)	Chlamydiales	Chlamydiaceae	Chlamydia	0
Chlamydia_trachomatis_A_HAR-13	810	Bacteria	Chlamydiae	Chlamydiae (class)	Chlamydiales	Chlamydiaceae	Chlamydia	0
Chlamydia_trachomatis_B_TZ1A828_OT	810	Bacteria	Chlamydiae	Chlamydiae (class)	Chlamydiales	Chlamydiaceae	Chlamydia	0
Chlamydia_trachomatis_D_UW_3_CX	810	Bacteria	Chlamydiae	Chlamydiae (class)	Chlamydiales	Chlamydiaceae	Chlamydia	0
Chlamydia_trachomatis_Jali20	580049	Bacteria	Chlamydiae	Chlamydiae (class)	Chlamydiales	Chlamydiaceae	Chlamydia	0
Chlamydia_trachomatis_L2b_UCH_1_proctitis	810	Bacteria	Chlamydiae	Chlamydiae (class)	Chlamydiales	Chlamydiaceae	Chlamydia	0
Chlamydophila_abortus_S26_3	83553	Bacteria	Chlamydiae	Chlamydiae (class)	Chlamydiales	Chlamydiaceae	Chlamydophila	0
Chlamydophila_caviae	83557	Bacteria	Chlamydiae	Chlamydiae (class)	Chlamydiales	Chlamydiaceae	Chlamydophila	0
Chlamydophila_felis_Fe_C-56	83553	Bacteria	Chlamydiae	Chlamydiae (class)	Chlamydiales	Chlamydiaceae	Chlamydophila	0
Chlamydophila_pneumoniae_AR39	115711	Bacteria	Chlamydiae	Chlamydiae (class)	Chlamydiales	Chlamydiaceae	Chlamydophila	0
Chlamydophila_pneumoniae_CWL029	115713	Bacteria	Chlamydiae	Chlamydiae (class)	Chlamydiales	Chlamydiaceae	Chlamydophila	0
Chlamydophila_pneumoniae_J138	138677	Bacteria	Chlamydiae	Chlamydiae (class)	Chlamydiales	Chlamydiaceae	Chlamydophila	0
Chlamydophila_pneumoniae_TW_183	182082	Bacteria	Chlamydiae	Chlamydiae (class)	Chlamydiales	Chlamydiaceae	Chlamydophila	0
Parachlamydia_sp_UWE25	264201	Bacteria	Chlamydiae	Chlamydiae (class)	Chlamydiales	Parachlamydiaceae	Candidatus Protochlamydia	0
Chlorobaculum_parvum_NCIB_8327	517417	Bacteria	Chlorobi	Chlorobia	Chlorobiales	Chlorobiaceae	Chlorobaculum	1	Rel[HS]
Chlorobium_chlorochromatii_CaD3	340177	Bacteria	Chlorobi	Chlorobia	Chlorobiales	Chlorobiaceae	Chlorobium	1	Rel[HS]
Chlorobium_limicola_DSM_245	290315	Bacteria	Chlorobi	Chlorobia	Chlorobiales	Chlorobiaceae	Chlorobium	1	Rel[HS]
Chlorobium_luteolum_DSM_273	319225	Bacteria	Chlorobi	Chlorobia	Chlorobiales	Chlorobiaceae	Pelodictyon	1	Rel[HS]
Chlorobium_phaeobacteroides_BS1	331678	Bacteria	Chlorobi	Chlorobia	Chlorobiales	Chlorobiaceae	Chlorobium	1	Rel[HS]
Chlorobium_phaeobacteroides_DSM_266	290317	Bacteria	Chlorobi	Chlorobia	Chlorobiales	Chlorobiaceae	Chlorobium	2	Rel[HS], RelQ[S]
Chlorobium_tepidum_TLS	194439	Bacteria	Chlorobi	Chlorobia	Chlorobiales	Chlorobiaceae	Chlorobaculum	1	Rel[HS]
Chloroherpeton_thalassium_ATCC_35110	517418	Bacteria	Chlorobi	Chlorobia	Chlorobiales	Chlorobiaceae	Chloroherpeton	2	Rel[HS], Mesh1-L[H]
Pelodictyon_phaeoclathratiforme_BU_1	324925	Bacteria	Chlorobi	Chlorobia	Chlorobiales	Chlorobiaceae	Pelodictyon	1	Rel[HS]
Prosthecochloris_aestuarii_DSM_271	290512	Bacteria	Chlorobi	Chlorobia	Chlorobiales	Chlorobiaceae	Prosthecochloris	2	Rel[HS], RelQ[S]
Prosthecochloris_vibrioformis_DSM_265	290318	Bacteria	Chlorobi	Chlorobia	Chlorobiales	Chlorobiaceae	Chlorobium	1	Rel[HS]
Chloroflexus_aggregans_DSM_9485	326427	Bacteria	Chloroflexi	Chloroflexi (class)	Chloroflexales	Chloroflexaceae	Chloroflexus	2	Rel[HS], pbcSpo2[H]
Chloroflexus_aurantiacus_J_10_fl	324602	Bacteria	Chloroflexi	Chloroflexi (class)	Chloroflexales	Chloroflexaceae	Chloroflexus	2	Rel[HS], pbcSpo2[H]
Chloroflexus_Y_400_fl	1107	Bacteria	Chloroflexi	Chloroflexi (class)	Chloroflexales	Chloroflexaceae	Chloroflexus	2	Rel[HS], pbcSpo2[H]
Roseiflexus_castenholzii_DSM_13941	383372	Bacteria	Chloroflexi	Chloroflexi (class)	Chloroflexales	Chloroflexaceae	Roseiflexus	2	Rel[HS], Mesh1-L[H]
Roseiflexus_RS-1	120961	Bacteria	Chloroflexi	Chloroflexi (class)	Chloroflexales	Chloroflexaceae	Roseiflexus	2	Rel[HS], Mesh1-L[H]
Herpetosiphon_aurantiacus_ATCC_23779	316274	Bacteria	Chloroflexi	Chloroflexi (class)	Herpetosiphonales	Herpetosiphonaceae	Herpetosiphon	1	Rel[HS]
Dehalococcoides_BAV1	61434	Bacteria	Chloroflexi	Dehalococcoidetes	no info	no info	Dehalococcoides	1	Rel[HS]
Dehalococcoides_CBDB1	61434	Bacteria	Chloroflexi	Dehalococcoidetes	no info	no info	Dehalococcoides	1	Rel[HS]
Dehalococcoides_ethenogenes_195	243164	Bacteria	Chloroflexi	Dehalococcoidetes	no info	no info	Dehalococcoides	1	Rel[HS]
Thermomicrobium_roseum_DSM_5159	309801	Bacteria	Chloroflexi	Thermomicrobia (class)	Thermomicrobiales	Thermomicrobiaceae	Thermomicrobium	1	Rel[HS]
Gloeobacter_violaceus	33072	Bacteria	Cyanobacteria	Gloeobacteria	Gloeobacterales	no info	Gloeobacter	2	Rel[HS], Mesh1-L[H]
Cyanobacteria_bacterium_Yellowstone_A-Prime	321327	Bacteria	Cyanobacteria	no info	Chroococcales	no info	Synechococcus	2	Rel[HS], Mesh1-L[H]
Cyanobacteria_bacterium_Yellowstone_B-Prime	321332	Bacteria	Cyanobacteria	no info	Chroococcales	no info	Synechococcus	2	Rel[HS], Mesh1-L[H]
Cyanothece_ATCC_51142	43988	Bacteria	Cyanobacteria	no info	Chroococcales	no info	Cyanothece	3	Rel[HS], divSpo[H], capRel[S]
Cyanothece_PCC_7424	65393	Bacteria	Cyanobacteria	no info	Chroococcales	no info	Cyanothece	2	Rel[HS], Mesh1-L[H]
Cyanothece_PCC_7425	43988	Bacteria	Cyanobacteria	no info	Chroococcales	no info	Cyanothece	4	Rel[HS], Mesh1-L[H], Mesh1-L[H], Mesh1-L[H]
Cyanothece_PCC_8801	41431	Bacteria	Cyanobacteria	no info	Chroococcales	no info	Cyanothece	2	divRel[S], Rel[HS]
Cyanothece_PCC_8802	43988	Bacteria	Cyanobacteria	no info	Chroococcales	no info	Cyanothece	2	divRel[S], Rel[HS]
Microcystis_aeruginosa_NIES_843	449447	Bacteria	Cyanobacteria	no info	Chroococcales	no info	Microcystis	1	Rel[HS]
Synechococcus_CC9311	1129	Bacteria	Cyanobacteria	no info	Chroococcales	no info	Synechococcus	1	Rel[HS]
Synechococcus_CC9605	1129	Bacteria	Cyanobacteria	no info	Chroococcales	no info	Synechococcus	1	Rel[HS]
Synechococcus_CC9902	1129	Bacteria	Cyanobacteria	no info	Chroococcales	no info	Synechococcus	1	Rel[HS]
Synechococcus_elongatus_PCC_6301	269084	Bacteria	Cyanobacteria	no info	Chroococcales	no info	Synechococcus	2	Rel[HS], Mesh1-L[H]
Synechococcus_elongatus_PCC_7942	1140	Bacteria	Cyanobacteria	no info	Chroococcales	no info	Synechococcus	2	Rel[HS], Mesh1-L[H]
Synechococcus_PCC_7002	1129	Bacteria	Cyanobacteria	no info	Chroococcales	no info	Synechococcus	4	Rel[HS], Mesh1-L[H], pbcSpo2[H], Mesh1-L[H]
Synechococcus_RCC307	1129	Bacteria	Cyanobacteria	no info	Chroococcales	no info	Synechococcus	1	Rel[HS]
Synechococcus_sp_WH8102	84588	Bacteria	Cyanobacteria	no info	Chroococcales	no info	Synechococcus	1	Rel[HS]
Synechococcus_WH_7803	1129	Bacteria	Cyanobacteria	no info	Chroococcales	no info	Synechococcus	1	Rel[HS]
Synechocystis_PCC6803	1148	Bacteria	Cyanobacteria	no info	Chroococcales	no info	Synechocystis	3	Rel[HS], Mesh1-L[H], Mesh1-L[H]
Thermosynechococcus_elongatus	146786	Bacteria	Cyanobacteria	no info	Chroococcales	no info	Thermosynechococcus	1	Rel[HS]
Acaryochloris_marina_MBIC11017	329726	Bacteria	Cyanobacteria	no info	no info	no info	Acaryochloris	2	Rel[HS], pbcSpo[H]
Anabaena_variabilis_ATCC_29413	240292	Bacteria	Cyanobacteria	no info	Nostocales	Nostocaceae	Anabaena	2	Rel[HS], Mesh1-L[H]
Nostoc_punctiforme_PCC_73102	63737	Bacteria	Cyanobacteria	no info	Nostocales	Nostocaceae	Nostoc	3	Rel[HS], Mesh1-L[H], pbcSpo2[H]
Nostoc_sp	1180	Bacteria	Cyanobacteria	no info	Nostocales	Nostocaceae	Nostoc	2	Rel[HS], Mesh1-L[H]
Trichodesmium_erythraeum_IMS101	203124	Bacteria	Cyanobacteria	no info	Oscillatoriales	no info	Trichodesmium	2	Rel[HS], Mesh1-L[H]
Prochlorococcus_marinus_AS9601	1218	Bacteria	Cyanobacteria	no info	Prochlorales	Prochlorococcaceae	Prochlorococcus	1	Rel[HS]
Prochlorococcus_marinus_CCMP1375	1218	Bacteria	Cyanobacteria	no info	Prochlorales	Prochlorococcaceae	Prochlorococcus	1	Rel[HS]
Prochlorococcus_marinus_MED4	59919	Bacteria	Cyanobacteria	no info	Prochlorales	Prochlorococcaceae	Prochlorococcus	1	Rel[HS]
Prochlorococcus_marinus_MIT9313	74547	Bacteria	Cyanobacteria	no info	Prochlorales	Prochlorococcaceae	Prochlorococcus	1	Rel[HS]
Prochlorococcus_marinus_MIT_9211	1218	Bacteria	Cyanobacteria	no info	Prochlorales	Prochlorococcaceae	Prochlorococcus	1	Rel[HS]
Prochlorococcus_marinus_MIT_9215	93060	Bacteria	Cyanobacteria	no info	Prochlorales	Prochlorococcaceae	Prochlorococcus	1	Rel[HS]
Prochlorococcus_marinus_MIT_9301	1218	Bacteria	Cyanobacteria	no info	Prochlorales	Prochlorococcaceae	Prochlorococcus	1	Rel[HS]
Prochlorococcus_marinus_MIT_9303	1218	Bacteria	Cyanobacteria	no info	Prochlorales	Prochlorococcaceae	Prochlorococcus	1	Rel[HS]
Prochlorococcus_marinus_MIT_9312	1218	Bacteria	Cyanobacteria	no info	Prochlorales	Prochlorococcaceae	Prochlorococcus	1	Rel[HS]
Prochlorococcus_marinus_MIT_9515	1218	Bacteria	Cyanobacteria	no info	Prochlorales	Prochlorococcaceae	Prochlorococcus	1	Rel[HS]
Prochlorococcus_marinus_NATL1A	1218	Bacteria	Cyanobacteria	no info	Prochlorales	Prochlorococcaceae	Prochlorococcus	1	Rel[HS]
Prochlorococcus_marinus_NATL2A	1218	Bacteria	Cyanobacteria	no info	Prochlorales	Prochlorococcaceae	Prochlorococcus	1	Rel[HS]
Deinococcus_deserti_VCD115	546414	Bacteria	Deinococcus-Thermus	Deinococci	Deinococcales	Deinococcaceae	Deinococcus	2	divRel[S], Rel[HS]
Deinococcus_geothermalis_DSM_11300	319795	Bacteria	Deinococcus-Thermus	Deinococci	Deinococcales	Deinococcaceae	Deinococcus	3	divRel[S], Rel[HS], SYNTH[S]
Deinococcus_radiodurans	1299	Bacteria	Deinococcus-Thermus	Deinococci	Deinococcales	Deinococcaceae	Deinococcus	2	divRel[S], Rel[HS]
Thermus_thermophilus_HB27	262724	Bacteria	Deinococcus-Thermus	Deinococci	Thermales	Thermaceae	Thermus	1	Rel[HS]
Thermus_thermophilus_HB8	300852	Bacteria	Deinococcus-Thermus	Deinococci	Thermales	Thermaceae	Thermus	1	Rel[HS]
Dictyoglomus_thermophilum_H_6_12	309799	Bacteria	Dictyoglomi	Dictyoglomia	Dictyoglomales	Dictyoglomaceae	Dictyoglomus	1	Rel[HS]
Dictyoglomus_turgidum_DSM_6724	515635	Bacteria	Dictyoglomi	Dictyoglomia	Dictyoglomales	Dictyoglomaceae	Dictyoglomus	1	Rel[HS]
Elusimicrobium_minutum_Pei191	445932	Bacteria	Elusimicrobia	Elusimicrobia (class)	Elusimicrobiales	Elusimicrobiaceae	Elusimicrobium	1	Rel[HS]†
uncultured_Termite_group_1_bacterium_phylotype_Rs_D17	471821	Bacteria	Elusimicrobia	no info	no info	no info	uncultured termite group	0
Fibrobacter_succinogenes_S85	59374	Bacteria	Fibrobacteres	Fibrobacteres (class)	Fibrobacterales	Fibrobacteraceae	Fibrobacter	4	divRel[S], Rel[HS], Mesh1-L[H], Rel[S]
Alicyclobacillus_acidocaldarius_DSM_446	29330	Bacteria	Firmicutes	Bacilli	Bacillales	Alicyclobacillaceae	Alicyclobacillus	1	Rel[HS]
Anoxybacillus_flavithermus_WK1	491915	Bacteria	Firmicutes	Bacilli	Bacillales	Bacillaceae	Anoxybacillus	2	Rel[HS], RelP[S]
Bacillus_amyloliquefaciens_FZB42	326423	Bacteria	Firmicutes	Bacilli	Bacillales	Bacillaceae	Bacillus	3	Rel[HS], RelP[S], RelQ[S]
Bacillus_anthracis_A0248	592021	Bacteria	Firmicutes	Bacilli	Bacillales	Bacillaceae	Bacillus	4	fpRel[S], Rel[HS], RelP[S], RelQ[S]
Bacillus_anthracis_Ames	198094	Bacteria	Firmicutes	Bacilli	Bacillales	Bacillaceae	Bacillus	3	Rel[HS], RelP[S], RelQ[S]
Bacillus_anthracis_Ames_0581	1386	Bacteria	Firmicutes	Bacilli	Bacillales	Bacillaceae	Bacillus	4	fpRel[S], Rel[HS], RelP[S], RelQ[S]
Bacillus_anthracis_CDC_684	568206	Bacteria	Firmicutes	Bacilli	Bacillales	Bacillaceae	Bacillus	4	fpRel[S], Rel[HS], RelP[S], RelQ[S]
Bacillus_anthracis_str_Sterne	260799	Bacteria	Firmicutes	Bacilli	Bacillales	Bacillaceae	Bacillus	3	Rel[HS], RelP[S], RelQ[S]
Bacillus_cereus_03BB102	572264	Bacteria	Firmicutes	Bacilli	Bacillales	Bacillaceae	Bacillus	4	Rel[HS], RshC[HS], RelP[S], RelQ[S]
Bacillus_cereus_AH187	405534	Bacteria	Firmicutes	Bacilli	Bacillales	Bacillaceae	Bacillus	3	Rel[HS], RelP[S], RelQ[S]
Bacillus_cereus_AH820	405535	Bacteria	Firmicutes	Bacilli	Bacillales	Bacillaceae	Bacillus	4	Rel[HS], RshC[HS], RelP[S], RelQ[S]
Bacillus_cereus_ATCC14579	1386	Bacteria	Firmicutes	Bacilli	Bacillales	Bacillaceae	Bacillus	3	Rel[HS], RelP[S], RelQ[S]
Bacillus_cereus_ATCC_10987	222523	Bacteria	Firmicutes	Bacilli	Bacillales	Bacillaceae	Bacillus	3	Rel[HS], RelP[S], RelQ[S]
Bacillus_cereus_B4264	405532	Bacteria	Firmicutes	Bacilli	Bacillales	Bacillaceae	Bacillus	3	Rel[HS], RelP[S], RelQ[S]
Bacillus_cereus_cytotoxis_NVH_391-98	1386	Bacteria	Firmicutes	Bacilli	Bacillales	Bacillaceae	Bacillus	4	Rel[HS], Rel[H], RelP[S], RelQ[S]
Bacillus_cereus_G9842	405531	Bacteria	Firmicutes	Bacilli	Bacillales	Bacillaceae	Bacillus	4	Rel[HS], RshC[HS], RelP[S], RelQ[S]
Bacillus_cereus_Q1	361100	Bacteria	Firmicutes	Bacilli	Bacillales	Bacillaceae	Bacillus	3	Rel[HS], RelP[S], RelQ[S]
Bacillus_cereus_ZK	288681	Bacteria	Firmicutes	Bacilli	Bacillales	Bacillaceae	Bacillus	4	Rel[HS], RshC[HS], RelP[S], RelQ[S]
Bacillus_clausii_KSM-K16	66692	Bacteria	Firmicutes	Bacilli	Bacillales	Bacillaceae	Bacillus	3	Rel[HS], RelP[S], RelQ[S]
Bacillus_halodurans	86665	Bacteria	Firmicutes	Bacilli	Bacillales	Bacillaceae	Bacillus	3	Rel[HS], RelP[S], RelQ[S]
Bacillus_licheniformis_ATCC_14580	279010	Bacteria	Firmicutes	Bacilli	Bacillales	Bacillaceae	Bacillus	3	Rel[HS], RelP[S], RelQ[S]
Bacillus_licheniformis_DSM_13	279010	Bacteria	Firmicutes	Bacilli	Bacillales	Bacillaceae	Bacillus	3	Rel[HS], RelP[S], RelQ[S]
Bacillus_pumilus_SAFR-032	315750	Bacteria	Firmicutes	Bacilli	Bacillales	Bacillaceae	Bacillus	3	Rel[HS], RelP[S], RelQ[S]
Bacillus_subtilis	1423	Bacteria	Firmicutes	Bacilli	Bacillales	Bacillaceae	Bacillus	3	Rel[HS], RelP[S], RelQ[S]
Bacillus_thuringiensis_Al_Hakam	412694	Bacteria	Firmicutes	Bacilli	Bacillales	Bacillaceae	Bacillus	4	Rel[HS], RshC[HS], RelP[S], RelQ[S]
Bacillus_thuringiensis_konkukian	1386	Bacteria	Firmicutes	Bacilli	Bacillales	Bacillaceae	Bacillus	3	Rel[HS], RelP[S], RelQ[S]
Bacillus_weihenstephanensis_KBAB4	315730	Bacteria	Firmicutes	Bacilli	Bacillales	Bacillaceae	Bacillus	5	Rel[HS], RshC[HS], pbcSpo[H], RelP[S], RelQ[S]
Geobacillus_kaustophilus_HTA426	235909	Bacteria	Firmicutes	Bacilli	Bacillales	Bacillaceae	Geobacillus	2	Rel[HS], RelP[S]
Geobacillus_thermodenitrificans_NG80-2	420246	Bacteria	Firmicutes	Bacilli	Bacillales	Bacillaceae	Geobacillus	2	Rel[HS], RelP[S]
Geobacillus_WCH70	129337	Bacteria	Firmicutes	Bacilli	Bacillales	Bacillaceae	Geobacillus	2	Rel[HS], RelP[S]
Geobacillus_Y412MC10	129337	Bacteria	Firmicutes	Bacilli	Bacillales	Bacillaceae	Geobacillus	3	Rel[HS], RelP[S], RelQ[S]
Geobacillus_Y412MC61	129337	Bacteria	Firmicutes	Bacilli	Bacillales	Bacillaceae	Geobacillus	2	Rel[HS], RelP[S]
Lysinibacillus_sphaericus_C3_41	444177	Bacteria	Firmicutes	Bacilli	Bacillales	Bacillaceae	Lysinibacillus	3	Rel[HS], RelP[S], RelQ[S]
Oceanobacillus_iheyensis	182710	Bacteria	Firmicutes	Bacilli	Bacillales	Bacillaceae	Oceanobacillus	3	Rel[HS], Mesh1-L[H], RelP[S]
Listeria_innocua	1642	Bacteria	Firmicutes	Bacilli	Bacillales	Listeriaceae	Listeria	4	Rel[HS], Mesh1-L[H], RelP[S], RelQ[S]
Listeria_monocytogenes	1639	Bacteria	Firmicutes	Bacilli	Bacillales	Listeriaceae	Listeria	4	Rel[HS], Mesh1-L[H], RelP[S], RelQ[S]
Listeria_monocytogenes_4b_F2365	1637	Bacteria	Firmicutes	Bacilli	Bacillales	Listeriaceae	Listeria	4	Rel[HS], Mesh1-L[H], RelP[S], RelQ[S]
Listeria_monocytogenes_Clip81459	568819	Bacteria	Firmicutes	Bacilli	Bacillales	Listeriaceae	Listeria	4	Rel[HS], Mesh1-L[H], RelP[S], RelQ[S]
Listeria_monocytogenes_HCC23	552536	Bacteria	Firmicutes	Bacilli	Bacillales	Listeriaceae	Listeria	4	Rel[HS], Mesh1-L[H], RelP[S], RelQ[S]
Listeria_welshimeri_serovar_6b_SLCC5334	386043	Bacteria	Firmicutes	Bacilli	Bacillales	Listeriaceae	Listeria	4	Rel[HS], Mesh1-L[H], RelP[S], RelQ[S]
Exiguobacterium_AT1b	33986	Bacteria	Firmicutes	Bacilli	Bacillales	no info	Exiguobacterium	5	divRel[S], Rel[HS], Mesh1-L[H], RelP[S], RelQ[S]
Exiguobacterium_sibiricum_255_15	262543	Bacteria	Firmicutes	Bacilli	Bacillales	no info	Exiguobacterium	3	divRel[S], Rel[HS], RelP[S]
Brevibacillus_brevis_NBRC_100599	358681	Bacteria	Firmicutes	Bacilli	Bacillales	Paenibacillaceae	Brevibacillus	4	Rel[HS], pbcSpo[H], RelP[S], RelP[S]
Paenibacillus_JDR_2	44249	Bacteria	Firmicutes	Bacilli	Bacillales	Paenibacillaceae	Paenibacillus	4	Rel[HS], Mesh1-L[H], RelP[S], RelQ[S]
Macrococcus_caseolyticus_JCSC5402	458233	Bacteria	Firmicutes	Bacilli	Bacillales	Staphylococcaceae	Macrococcus	3	Rel[HS], RelP[S], RelQ[S]
Staphylococcus_aureus_aureus_MRSA252	1279	Bacteria	Firmicutes	Bacilli	Bacillales	Staphylococcaceae	Staphylococcus	3	Rel[HS], RelP[S], RelQ[S]
Staphylococcus_aureus_aureus_MSSA476	1279	Bacteria	Firmicutes	Bacilli	Bacillales	Staphylococcaceae	Staphylococcus	3	Rel[HS], RelP[S], RelQ[S]
Staphylococcus_aureus_COL	93062	Bacteria	Firmicutes	Bacilli	Bacillales	Staphylococcaceae	Staphylococcus	3	Rel[HS], RelP[S], RelQ[S]
Staphylococcus_aureus_JH1	1279	Bacteria	Firmicutes	Bacilli	Bacillales	Staphylococcaceae	Staphylococcus	3	Rel[HS], RelP[S], RelQ[S]
Staphylococcus_aureus_JH9	1279	Bacteria	Firmicutes	Bacilli	Bacillales	Staphylococcaceae	Staphylococcus	3	Rel[HS], RelP[S], RelQ[S]
Staphylococcus_aureus_Mu3	1279	Bacteria	Firmicutes	Bacilli	Bacillales	Staphylococcaceae	Staphylococcus	3	Rel[HS], RelP[S], RelQ[S]
Staphylococcus_aureus_Mu50	1279	Bacteria	Firmicutes	Bacilli	Bacillales	Staphylococcaceae	Staphylococcus	3	Rel[HS], RelP[S], RelQ[S]
Staphylococcus_aureus_MW2	1279	Bacteria	Firmicutes	Bacilli	Bacillales	Staphylococcaceae	Staphylococcus	3	Rel[HS], RelP[S], RelQ[S]
Staphylococcus_aureus_N315	1279	Bacteria	Firmicutes	Bacilli	Bacillales	Staphylococcaceae	Staphylococcus	3	Rel[HS], RelP[S], RelQ[S]
Staphylococcus_aureus_NCTC_8325	93061	Bacteria	Firmicutes	Bacilli	Bacillales	Staphylococcaceae	Staphylococcus	3	Rel[HS], RelP[S], RelQ[S]
Staphylococcus_aureus_Newman	1279	Bacteria	Firmicutes	Bacilli	Bacillales	Staphylococcaceae	Staphylococcus	3	Rel[HS], RelP[S], RelQ[S]
Staphylococcus_aureus_RF122	273036	Bacteria	Firmicutes	Bacilli	Bacillales	Staphylococcaceae	Staphylococcus	3	Rel[HS], RelP[S], RelQ[S]
Staphylococcus_aureus_USA300_FPR3757	1279	Bacteria	Firmicutes	Bacilli	Bacillales	Staphylococcaceae	Staphylococcus	3	Rel[HS], RelP[S], RelQ[S]
Staphylococcus_aureus_USA300_TCH1516	1279	Bacteria	Firmicutes	Bacilli	Bacillales	Staphylococcaceae	Staphylococcus	3	Rel[HS], RelP[S], RelQ[S]
Staphylococcus_carnosus_TM300	1279	Bacteria	Firmicutes	Bacilli	Bacillales	Staphylococcaceae	Staphylococcus	3	Rel[HS], RelP[S], RelQ[S]
Staphylococcus_epidermidis_ATCC_12228	176280	Bacteria	Firmicutes	Bacilli	Bacillales	Staphylococcaceae	Staphylococcus	3	Rel[HS], RelP[S], RelQ[S]
Staphylococcus_epidermidis_RP62A	176279	Bacteria	Firmicutes	Bacilli	Bacillales	Staphylococcaceae	Staphylococcus	3	Rel[HS], RelP[S], RelQ[S]
Staphylococcus_haemolyticus	1283	Bacteria	Firmicutes	Bacilli	Bacillales	Staphylococcaceae	Staphylococcus	3	Rel[HS], RelP[S], RelQ[S]
Staphylococcus_saprophyticus	29385	Bacteria	Firmicutes	Bacilli	Bacillales	Staphylococcaceae	Staphylococcus	3	Rel[HS], RelP[S], RelQ[S]
Enterococcus_faecalis_V583	226185	Bacteria	Firmicutes	Bacilli	Lactobacillales	Enterococcaceae	Enterococcus	2	Rel[HS], RelP[S]
Lactobacillus_acidophilus_NCFM	272621	Bacteria	Firmicutes	Bacilli	Lactobacillales	Lactobacillaceae	Lactobacillus	3	Rel[HS], RelP[S], RelQ[S]
Lactobacillus_brevis_ATCC_367	387344	Bacteria	Firmicutes	Bacilli	Lactobacillales	Lactobacillaceae	Lactobacillus	2	Rel[HS], RelP[S]
Lactobacillus_casei	1582	Bacteria	Firmicutes	Bacilli	Lactobacillales	Lactobacillaceae	Lactobacillus	2	Rel[HS], RelP[S]
Lactobacillus_casei_ATCC_334	321967	Bacteria	Firmicutes	Bacilli	Lactobacillales	Lactobacillaceae	Lactobacillus	2	Rel[HS], RelP[S]
Lactobacillus_delbrueckii_bulgaricus	1585	Bacteria	Firmicutes	Bacilli	Lactobacillales	Lactobacillaceae	Lactobacillus	3	Rel[HS], RelP[S], RelQ[S]
Lactobacillus_delbrueckii_bulgaricus_ATCC_BAA-365	1578	Bacteria	Firmicutes	Bacilli	Lactobacillales	Lactobacillaceae	Lactobacillus	3	Rel[HS], RelP[S], RelQ[S]
Lactobacillus_fermentum_IFO_3956	334390	Bacteria	Firmicutes	Bacilli	Lactobacillales	Lactobacillaceae	Lactobacillus	3	Rel[HS], RelP[S], RelQ[S]
Lactobacillus_gasseri_ATCC_33323	324831	Bacteria	Firmicutes	Bacilli	Lactobacillales	Lactobacillaceae	Lactobacillus	3	Rel[HS], RelP[S], RelQ[S]
Lactobacillus_helveticus_DPC_4571	405566	Bacteria	Firmicutes	Bacilli	Lactobacillales	Lactobacillaceae	Lactobacillus	2	Rel[HS], RelP[S]
Lactobacillus_johnsonii_FI9785	633699	Bacteria	Firmicutes	Bacilli	Lactobacillales	Lactobacillaceae	Lactobacillus	3	Rel[HS], RelP[S], RelQ[S]
Lactobacillus_johnsonii_NCC_533	257314	Bacteria	Firmicutes	Bacilli	Lactobacillales	Lactobacillaceae	Lactobacillus	3	Rel[HS], RelP[S], RelQ[S]
Lactobacillus_plantarum	1590	Bacteria	Firmicutes	Bacilli	Lactobacillales	Lactobacillaceae	Lactobacillus	3	Rel[HS], RelP[S], RelQ[S]
Lactobacillus_plantarum_JDM1	644042	Bacteria	Firmicutes	Bacilli	Lactobacillales	Lactobacillaceae	Lactobacillus	3	Rel[HS], RelP[S], RelQ[S]
Lactobacillus_reuteri_DSM_20016	557436	Bacteria	Firmicutes	Bacilli	Lactobacillales	Lactobacillaceae	Lactobacillus	2	Rel[HS], RelP[S]*(RelQ[S])
Lactobacillus_reuteri_F275_Kitasato	1578	Bacteria	Firmicutes	Bacilli	Lactobacillales	Lactobacillaceae	Lactobacillus	3	Rel[HS], RelP[S], RelQ[S]
Lactobacillus_rhamnosus_GG	568703	Bacteria	Firmicutes	Bacilli	Lactobacillales	Lactobacillaceae	Lactobacillus	2	Rel[HS], RelP[S]
Lactobacillus_rhamnosus_Lc_705	568704	Bacteria	Firmicutes	Bacilli	Lactobacillales	Lactobacillaceae	Lactobacillus	2	Rel[HS], RelP[S]
Lactobacillus_sakei_23K	1578	Bacteria	Firmicutes	Bacilli	Lactobacillales	Lactobacillaceae	Lactobacillus	2	Rel[HS], RelP[S]
Lactobacillus_salivarius_UCC118	362948	Bacteria	Firmicutes	Bacilli	Lactobacillales	Lactobacillaceae	Lactobacillus	2	Rel[HS], RelP[S]
Pediococcus_pentosaceus_ATCC_25745	278197	Bacteria	Firmicutes	Bacilli	Lactobacillales	Lactobacillaceae	Pediococcus	3	Rel[HS], RelP[S], RelQ[S]
Leuconostoc_citreum_KM20	349519	Bacteria	Firmicutes	Bacilli	Lactobacillales	Leuconostocaceae	Leuconostoc	2	Rel[HS], RelP[S]
Leuconostoc_mesenteroides_ATCC_8293	1243	Bacteria	Firmicutes	Bacilli	Lactobacillales	Leuconostocaceae	Leuconostoc	2	Rel[HS], RelP[S]
Oenococcus_oeni_PSU-1	203123	Bacteria	Firmicutes	Bacilli	Lactobacillales	Leuconostocaceae	Oenococcus	1	Rel[HS]
Lactococcus_lactis	1358	Bacteria	Firmicutes	Bacilli	Lactobacillales	Streptococcaceae	Lactococcus	3	Rel[HS], RelP[S], RelQ[S]
Lactococcus_lactis_cremoris_MG1363	1357	Bacteria	Firmicutes	Bacilli	Lactobacillales	Streptococcaceae	Lactococcus	3	Rel[HS], RelP[S], RelQ[S]
Lactococcus_lactis_cremoris_SK11	1357	Bacteria	Firmicutes	Bacilli	Lactobacillales	Streptococcaceae	Lactococcus	3	Rel[HS], RelP[S], RelQ[S]
Streptococcus_agalactiae_2603	1301	Bacteria	Firmicutes	Bacilli	Lactobacillales	Streptococcaceae	Streptococcus	4	fpRel2[S], Rel[HS], RelP[S], RelQ[S]
Streptococcus_agalactiae_A909	205921	Bacteria	Firmicutes	Bacilli	Lactobacillales	Streptococcaceae	Streptococcus	3	Rel[HS], RelP[S], RelQ[S]
Streptococcus_agalactiae_NEM316	211110	Bacteria	Firmicutes	Bacilli	Lactobacillales	Streptococcaceae	Streptococcus	3	Rel[HS], RelP[S], RelQ[S]
Streptococcus_dysgalactiae_equisimilis_GGS_124	1301	Bacteria	Firmicutes	Bacilli	Lactobacillales	Streptococcaceae	Streptococcus	4	Rel[HS], RelP[S], RelQ[S], RelQ[S]
Streptococcus_equi_4047	1301	Bacteria	Firmicutes	Bacilli	Lactobacillales	Streptococcaceae	Streptococcus	4	fpRel2[S], Rel[HS], pbcSpo[H], RelP[S]
Streptococcus_equi_zooepidemicus	40041	Bacteria	Firmicutes	Bacilli	Lactobacillales	Streptococcaceae	Streptococcus	3	fpRel2[S], Rel[HS], RelP[S]
Streptococcus_equi_zooepidemicus_MGCS10565	1301	Bacteria	Firmicutes	Bacilli	Lactobacillales	Streptococcaceae	Streptococcus	2	Rel[HS], RelP[S]
Streptococcus_gordonii_Challis_substr_CH1	1301	Bacteria	Firmicutes	Bacilli	Lactobacillales	Streptococcaceae	Streptococcus	3	Rel[HS], RelP[S], RelQ[S]
Streptococcus_mutans	1309	Bacteria	Firmicutes	Bacilli	Lactobacillales	Streptococcaceae	Streptococcus	4	fpRel2[S], Rel[HS], RelP[S], RelQ[S]
Streptococcus_pneumoniae_70585	488221	Bacteria	Firmicutes	Bacilli	Lactobacillales	Streptococcaceae	Streptococcus	2	Rel[HS], RelP[S]
Streptococcus_pneumoniae_ATCC_700669	561276	Bacteria	Firmicutes	Bacilli	Lactobacillales	Streptococcaceae	Streptococcus	3	Rel[HS], Mesh1-L[H], RelP[S]
Streptococcus_pneumoniae_CGSP14	516950	Bacteria	Firmicutes	Bacilli	Lactobacillales	Streptococcaceae	Streptococcus	3	Rel[HS], Mesh1-L[H], RelP[S]
Streptococcus_pneumoniae_D39	373153	Bacteria	Firmicutes	Bacilli	Lactobacillales	Streptococcaceae	Streptococcus	2	Rel[HS], RelP[S]
Streptococcus_pneumoniae_G54	512566	Bacteria	Firmicutes	Bacilli	Lactobacillales	Streptococcaceae	Streptococcus	3	Rel[HS], pbcSpo[H], RelP[S]
Streptococcus_pneumoniae_Hungary19A_6	487214	Bacteria	Firmicutes	Bacilli	Lactobacillales	Streptococcaceae	Streptococcus	3	Rel[HS], pbcSpo[H], RelP[S]
Streptococcus_pneumoniae_JJA	488222	Bacteria	Firmicutes	Bacilli	Lactobacillales	Streptococcaceae	Streptococcus	3	Rel[HS], pbcSpo[H], RelP[S]
Streptococcus_pneumoniae_P1031	488223	Bacteria	Firmicutes	Bacilli	Lactobacillales	Streptococcaceae	Streptococcus	2	Rel[HS], RelP[S]
Streptococcus_pneumoniae_R6	171101	Bacteria	Firmicutes	Bacilli	Lactobacillales	Streptococcaceae	Streptococcus	2	Rel[HS], RelP[S]
Streptococcus_pneumoniae_Taiwan19F_14	487213	Bacteria	Firmicutes	Bacilli	Lactobacillales	Streptococcaceae	Streptococcus	2	Rel[HS], RelP[S]
Streptococcus_pneumoniae_TIGR4	170187	Bacteria	Firmicutes	Bacilli	Lactobacillales	Streptococcaceae	Streptococcus	2	Rel[HS], RelP[S]
Streptococcus_pyogenes_M1_GAS	160490	Bacteria	Firmicutes	Bacilli	Lactobacillales	Streptococcaceae	Streptococcus	3	Rel[HS], RelP[S], RelQ[S]
Streptococcus_pyogenes_Manfredo	160491	Bacteria	Firmicutes	Bacilli	Lactobacillales	Streptococcaceae	Streptococcus	3	Rel[HS], RelP[S], RelQ[S]
Streptococcus_pyogenes_MGAS10270	370552	Bacteria	Firmicutes	Bacilli	Lactobacillales	Streptococcaceae	Streptococcus	3	Rel[HS], RelP[S], RelQ[S]
Streptococcus_pyogenes_MGAS10394	286636	Bacteria	Firmicutes	Bacilli	Lactobacillales	Streptococcaceae	Streptococcus	3	Rel[HS], RelP[S], RelQ[S]
Streptococcus_pyogenes_MGAS10750	370554	Bacteria	Firmicutes	Bacilli	Lactobacillales	Streptococcaceae	Streptococcus	3	Rel[HS], RelP[S], RelQ[S]
Streptococcus_pyogenes_MGAS2096	370553	Bacteria	Firmicutes	Bacilli	Lactobacillales	Streptococcaceae	Streptococcus	3	Rel[HS], RelP[S], RelQ[S]
Streptococcus_pyogenes_MGAS315	198466	Bacteria	Firmicutes	Bacilli	Lactobacillales	Streptococcaceae	Streptococcus	3	Rel[HS], RelP[S], RelQ[S]
Streptococcus_pyogenes_MGAS5005	293653	Bacteria	Firmicutes	Bacilli	Lactobacillales	Streptococcaceae	Streptococcus	3	Rel[HS], RelP[S], RelQ[S]
Streptococcus_pyogenes_MGAS6180	319701	Bacteria	Firmicutes	Bacilli	Lactobacillales	Streptococcaceae	Streptococcus	3	Rel[HS], RelP[S], RelQ[S]
Streptococcus_pyogenes_MGAS8232	186103	Bacteria	Firmicutes	Bacilli	Lactobacillales	Streptococcaceae	Streptococcus	3	Rel[HS], RelP[S], RelQ[S]
Streptococcus_pyogenes_MGAS9429	370551	Bacteria	Firmicutes	Bacilli	Lactobacillales	Streptococcaceae	Streptococcus	3	Rel[HS], RelP[S], RelQ[S]
Streptococcus_pyogenes_NZ131	471876	Bacteria	Firmicutes	Bacilli	Lactobacillales	Streptococcaceae	Streptococcus	3	Rel[HS], RelP[S], RelQ[S]
Streptococcus_pyogenes_SSI-1	193567	Bacteria	Firmicutes	Bacilli	Lactobacillales	Streptococcaceae	Streptococcus	3	Rel[HS], RelP[S], RelQ[S]
Streptococcus_sanguinis_SK36	388919	Bacteria	Firmicutes	Bacilli	Lactobacillales	Streptococcaceae	Streptococcus	3	Rel[HS], RelP[S], RelQ[S]
Streptococcus_suis_05ZYH33	391295	Bacteria	Firmicutes	Bacilli	Lactobacillales	Streptococcaceae	Streptococcus	2	Rel[HS], RelP[S]
Streptococcus_suis_98HAH33	391296	Bacteria	Firmicutes	Bacilli	Lactobacillales	Streptococcaceae	Streptococcus	2	Rel[HS], RelP[S]
Streptococcus_suis_BM407	568814	Bacteria	Firmicutes	Bacilli	Lactobacillales	Streptococcaceae	Streptococcus	2	Rel[HS], RelP[S]
Streptococcus_suis_P1_7	1301	Bacteria	Firmicutes	Bacilli	Lactobacillales	Streptococcaceae	Streptococcus	2	Rel[HS], RelP[S]
Streptococcus_suis_SC84	568813	Bacteria	Firmicutes	Bacilli	Lactobacillales	Streptococcaceae	Streptococcus	2	Rel[HS], RelP[S]
Streptococcus_thermophilus_CNRZ1066	299768	Bacteria	Firmicutes	Bacilli	Lactobacillales	Streptococcaceae	Streptococcus	2	Rel[HS], RelP[S]
Streptococcus_thermophilus_LMD-9	322159	Bacteria	Firmicutes	Bacilli	Lactobacillales	Streptococcaceae	Streptococcus	2	Rel[HS], RelP[S]
Streptococcus_thermophilus_LMG_18311	264199	Bacteria	Firmicutes	Bacilli	Lactobacillales	Streptococcaceae	Streptococcus	2	Rel[HS], RelP[S]
Streptococcus_uberis_0140J	218495	Bacteria	Firmicutes	Bacilli	Lactobacillales	Streptococcaceae	Streptococcus	2	Rel[HS], RelP[S]
Alkaliphilus_metalliredigens_QYMF	293826	Bacteria	Firmicutes	Clostridia	Clostridiales	Clostridiaceae	Alkaliphilus	3	Rel[HS], RelP[S], RelQ[S]
Alkaliphilus_oremlandii_OhILAs	350688	Bacteria	Firmicutes	Clostridia	Clostridiales	Clostridiaceae	Alkaliphilus	4	Rel[HS], divSpo[H], RelP[S], RelQ[S]
Clostridium_acetobutylicum	1488	Bacteria	Firmicutes	Clostridia	Clostridiales	Clostridiaceae	Clostridium	3	Rel[HS], RelP[S], RelQ[S]
Clostridium_beijerinckii_NCIMB_8052	290402	Bacteria	Firmicutes	Clostridia	Clostridiales	Clostridiaceae	Clostridium	5	fpRel[S], Rel[HS], pbcSpo[H], RelP[S], RelQ[S]
Clostridium_botulinum_A	36826	Bacteria	Firmicutes	Clostridia	Clostridiales	Clostridiaceae	Clostridium	3	fpRel[S], Rel[HS], RelP[S]
Clostridium_botulinum_A2_Kyoto	1485	Bacteria	Firmicutes	Clostridia	Clostridiales	Clostridiaceae	Clostridium	3	fpRel[S], Rel[HS], RelP[S]
Clostridium_botulinum_A3_Loch_Maree	1485	Bacteria	Firmicutes	Clostridia	Clostridiales	Clostridiaceae	Clostridium	3	fpRel[S], Rel[HS], RelP[S]
Clostridium_botulinum_A_ATCC_19397	441770	Bacteria	Firmicutes	Clostridia	Clostridiales	Clostridiaceae	Clostridium	3	fpRel[S], Rel[HS], RelP[S]
Clostridium_botulinum_A_Hall	1485	Bacteria	Firmicutes	Clostridia	Clostridiales	Clostridiaceae	Clostridium	3	fpRel[S], Rel[HS], RelP[S]
Clostridium_botulinum_B1_Okra	1485	Bacteria	Firmicutes	Clostridia	Clostridiales	Clostridiaceae	Clostridium	3	fpRel[S], Rel[HS], RelP[S]
Clostridium_botulinum_Ba4_657	1485	Bacteria	Firmicutes	Clostridia	Clostridiales	Clostridiaceae	Clostridium	3	fpRel[S], Rel[HS], RelP[S]
Clostridium_botulinum_B_Eklund_17B	1485	Bacteria	Firmicutes	Clostridia	Clostridiales	Clostridiaceae	Clostridium	4	fpRel[S], Rel[HS], RelP[S], RelQ[S]
Clostridium_botulinum_E3_Alaska_E43	1485	Bacteria	Firmicutes	Clostridia	Clostridiales	Clostridiaceae	Clostridium	4	fpRel[S], Rel[HS], RelP[S], RelQ[S]
Clostridium_botulinum_F_Langeland	1485	Bacteria	Firmicutes	Clostridia	Clostridiales	Clostridiaceae	Clostridium	3	fpRel[S], Rel[HS], RelP[S]
Clostridium_cellulolyticum_H10	394503	Bacteria	Firmicutes	Clostridia	Clostridiales	Clostridiaceae	Clostridium	3	divRel[S], Rel[HS], RelQ[S]
Clostridium_difficile_630	272563	Bacteria	Firmicutes	Clostridia	Clostridiales	Clostridiaceae	Clostridium	3	cloRel[S], Rel[HS], RelP[S]
Clostridium_difficile_CD196	645462	Bacteria	Firmicutes	Clostridia	Clostridiales	Clostridiaceae	Clostridium	3	cloRel[S], Rel[HS], RelP[S]
Clostridium_difficile_R20291	645463	Bacteria	Firmicutes	Clostridia	Clostridiales	Clostridiaceae	Clostridium	3	cloRel[S], Rel[HS], RelP[S]
Clostridium_kluyveri_DSM_555	431943	Bacteria	Firmicutes	Clostridia	Clostridiales	Clostridiaceae	Clostridium	3	Rel[HS], pbcSpo[H], RelP[S]
Clostridium_kluyveri_NBRC_12016	583346	Bacteria	Firmicutes	Clostridia	Clostridiales	Clostridiaceae	Clostridium	3	Rel[HS], pbcSpo[H], RelP[S]
Clostridium_novyi_NT	386415	Bacteria	Firmicutes	Clostridia	Clostridiales	Clostridiaceae	Clostridium	2	Rel[HS], RelP[S]
Clostridium_perfringens	1502	Bacteria	Firmicutes	Clostridia	Clostridiales	Clostridiaceae	Clostridium	4	cloRel[S], fpRel[S], Rel[HS], RelP[S]
Clostridium_perfringens_ATCC_13124	195103	Bacteria	Firmicutes	Clostridia	Clostridiales	Clostridiaceae	Clostridium	4	cloRel[S], fpRel[S], Rel[HS], RelP[S]
Clostridium_perfringens_SM101	289380	Bacteria	Firmicutes	Clostridia	Clostridiales	Clostridiaceae	Clostridium	4	cloRel[S], fpRel[S], Rel[HS], RelP[S]
Clostridium_phytofermentans_ISDg	357809	Bacteria	Firmicutes	Clostridia	Clostridiales	Clostridiaceae	Clostridium	3	Rel[HS], RelP[S], RelQ[S]
Clostridium_tetani_E88	212717	Bacteria	Firmicutes	Clostridia	Clostridiales	Clostridiaceae	Clostridium	3	cloRel[S], Rel[HS], RelP[S]
Clostridium_thermocellum_ATCC_27405	203119	Bacteria	Firmicutes	Clostridia	Clostridiales	Clostridiaceae	Clostridium	1	Rel[HS]
Anaerococcus_prevotii_DSM_20548	525919	Bacteria	Firmicutes	Clostridia	Clostridiales	Clostridiales Family XI. Incertae Sedis	Anaerococcus	1	Rel[HS]
Finegoldia_magna_ATCC_29328	334413	Bacteria	Firmicutes	Clostridia	Clostridiales	Clostridiales Family XI. Incertae Sedis	Finegoldia	2	cloRel[S], Rel[HS]
Symbiobacterium_thermophilum_IAM14863	292459	Bacteria	Firmicutes	Clostridia	Clostridiales	Clostridiales Family XVIII. Incertae Sedis	Symbiobacterium	2	divRel[S], Rel[HS]
Eubacterium_eligens_ATCC_27750	515620	Bacteria	Firmicutes	Clostridia	Clostridiales	Eubacteriaceae	Eubacterium	5	divRel[S], Rel[HS], RelP[S], RelQ[S], RelQ[S]
Eubacterium_rectale_ATCC_33656	515619	Bacteria	Firmicutes	Clostridia	Clostridiales	Eubacteriaceae	Eubacterium	3	Rel[HS], RelQ[S], RelQ[S]
Heliobacterium_modesticaldum_Ice1	498761	Bacteria	Firmicutes	Clostridia	Clostridiales	Heliobacteriaceae	Heliobacterium	2	Rel[HS], RelQ[S]
Candidatus_Desulforudis_audaxviator_MP104C	477974	Bacteria	Firmicutes	Clostridia	Clostridiales	Peptococcaceae	Candidatus Desulforudis	1	Rel[HS]
Desulfitobacterium_hafniense_DCB_2	272564	Bacteria	Firmicutes	Clostridia	Clostridiales	Peptococcaceae	Desulfitobacterium	2	Rel[HS], RelQ[S]
Desulfitobacterium_hafniense_Y51	138119	Bacteria	Firmicutes	Clostridia	Clostridiales	Peptococcaceae	Desulfitobacterium	4	Rel[HS], pbcSpo[H], RelQ[S], RelQ[S]
Desulfotomaculum_acetoxidans_DSM_771	485916	Bacteria	Firmicutes	Clostridia	Clostridiales	Peptococcaceae	Desulfotomaculum	1	Rel[HS]
Desulfotomaculum_reducens_MI-1	349161	Bacteria	Firmicutes	Clostridia	Clostridiales	Peptococcaceae	Desulfotomaculum	1	Rel[HS]
Pelotomaculum_thermopropionicum_SI	370438	Bacteria	Firmicutes	Clostridia	Clostridiales	Peptococcaceae	Pelotomaculum	1	Rel[HS]
Syntrophomonas_wolfei_Goettingen	335541	Bacteria	Firmicutes	Clostridia	Clostridiales	Syntrophomonadaceae	Syntrophomonas	1	Rel[HS]
Halothermothrix_orenii_H_168	373903	Bacteria	Firmicutes	Clostridia	Halanaerobiales	Halanaerobiaceae	Halothermothrix	1	Rel[HS]
Natranaerobius_thermophilus_JW_NM_WN_LF	375928	Bacteria	Firmicutes	Clostridia	Natranaerobiales	Natranaerobiaceae	Natranaerobius	1	Rel[HS]
Ammonifex_degensii_KC4	429009	Bacteria	Firmicutes	Clostridia	Thermoanaerobacterales	Thermoanaerobacteraceae	Ammonifex	1	Rel[HS]
Carboxydothermus_hydrogenoformans_Z-2901	246194	Bacteria	Firmicutes	Clostridia	Thermoanaerobacterales	Thermoanaerobacteraceae	Carboxydothermus	1	Rel[HS]
Moorella_thermoacetica_ATCC_39073	264732	Bacteria	Firmicutes	Clostridia	Thermoanaerobacterales	Thermoanaerobacteraceae	Moorella	1	Rel[HS]
Thermoanaerobacter_pseudethanolicus_ATCC_33223	340099	Bacteria	Firmicutes	Clostridia	Thermoanaerobacterales	Thermoanaerobacteraceae	Thermoanaerobacter	1	Rel[HS]
Thermoanaerobacter_tengcongensis	119072	Bacteria	Firmicutes	Clostridia	Thermoanaerobacterales	Thermoanaerobacteraceae	Thermoanaerobacter	1	Rel[HS]
Thermoanaerobacter_X514	1754	Bacteria	Firmicutes	Clostridia	Thermoanaerobacterales	Thermoanaerobacteraceae	Thermoanaerobacter	0
Anaerocellum_thermophilum_DSM_6725	521460	Bacteria	Firmicutes	Clostridia	Thermoanaerobacterales	Thermoanaerobacterales Family III. Incertae Sedis	Caldicellulosiruptor	1	Rel[HS]
Caldicellulosiruptor_saccharolyticus_DSM_8903	351627	Bacteria	Firmicutes	Clostridia	Thermoanaerobacterales	Thermoanaerobacterales Family III. Incertae Sedis	Caldicellulosiruptor	1	Rel[HS]
Coprothermobacter_proteolyticus_DSM_5265	309798	Bacteria	Firmicutes	Clostridia	Thermoanaerobacterales	Thermodesulfobiaceae	Coprothermobacter	1	Rel[HS]
Fusobacterium_nucleatum	851	Bacteria	Fusobacteria	Fusobacteria (class)	Fusobacteriales	Fusobacteriaceae	Fusobacterium	2	fpRel[S], Rel[HS]
Leptotrichia_buccalis_DSM_1135	523794	Bacteria	Fusobacteria	Fusobacteria (class)	Fusobacteriales	Fusobacteriaceae	Leptotrichia	1	Rel[HS]
Gemmatimonas_aurantiaca_T_27	379066	Bacteria	Gemmatimonadetes	Gemmatimonadetes (class)	Gemmatimonadales	Gemmatimonadaceae	Gemmatimonas	2	Rel[HS], Mesh1-L[H]
Thermodesulfovibrio_yellowstonii_DSM_11347	289376	Bacteria	Nitrospirae	Nitrospira (class)	Nitrospirales	Nitrospiraceae	Thermodesulfovibrio	1	Rel[HS]
Pirellula_sp	117	Bacteria	Planctomycetes	Planctomycetacia	Planctomycetales	Planctomycetaceae	Pirellula	0
Caulobacter_crescentus	155892	Bacteria	Proteobacteria	Alphaproteobacteria	Caulobacterales	Caulobacteraceae	Caulobacter	1	Rel[HS]
Caulobacter_crescentus_NA1000	565050	Bacteria	Proteobacteria	Alphaproteobacteria	Caulobacterales	Caulobacteraceae	Caulobacter	1	Rel[HS]
Caulobacter_K31	75	Bacteria	Proteobacteria	Alphaproteobacteria	Caulobacterales	Caulobacteraceae	Caulobacter	1	Rel[HS]
Phenylobacterium_zucineum_HLK1	450851	Bacteria	Proteobacteria	Alphaproteobacteria	Caulobacterales	Caulobacteraceae	Phenylobacterium	1	Rel[HS]
Bartonella_bacilliformis_KC583	360095	Bacteria	Proteobacteria	Alphaproteobacteria	Rhizobiales	Bartonellaceae	Bartonella	1	Rel[HS]
Bartonella_grahamii_as4aup	634504	Bacteria	Proteobacteria	Alphaproteobacteria	Rhizobiales	Bartonellaceae	Bartonella	1	Rel[HS]
Bartonella_henselae_Houston-1	773	Bacteria	Proteobacteria	Alphaproteobacteria	Rhizobiales	Bartonellaceae	Bartonella	1	Rel[HS]
Bartonella_quintana_Toulouse	773	Bacteria	Proteobacteria	Alphaproteobacteria	Rhizobiales	Bartonellaceae	Bartonella	1	Rel[HS]
Bartonella_tribocorum_CIP_105476	382640	Bacteria	Proteobacteria	Alphaproteobacteria	Rhizobiales	Bartonellaceae	Bartonella	1	Rel[HS]
Beijerinckia_indica_ATCC_9039	532	Bacteria	Proteobacteria	Alphaproteobacteria	Rhizobiales	Beijerinckiaceae	Beijerinckia	2	fpRel[S], Rel[HS]
Methylocella_silvestris_BL2	395965	Bacteria	Proteobacteria	Alphaproteobacteria	Rhizobiales	Beijerinckiaceae	Methylocella	1	Rel[HS]
Bradyrhizobium_BTAi1	374	Bacteria	Proteobacteria	Alphaproteobacteria	Rhizobiales	Bradyrhizobiaceae	Bradyrhizobium	3	Rel[HS], Mesh1[H], Mesh1-L[H]
Bradyrhizobium_japonicum	375	Bacteria	Proteobacteria	Alphaproteobacteria	Rhizobiales	Bradyrhizobiaceae	Bradyrhizobium	2	Rel[HS], Mesh1[H]
Bradyrhizobium_ORS278	374	Bacteria	Proteobacteria	Alphaproteobacteria	Rhizobiales	Bradyrhizobiaceae	Bradyrhizobium	3	Rel[HS], Mesh1[H], Mesh1-L[H]
Nitrobacter_hamburgensis_X14	323097	Bacteria	Proteobacteria	Alphaproteobacteria	Rhizobiales	Bradyrhizobiaceae	Nitrobacter	1	Rel[HS]
Nitrobacter_winogradskyi_Nb-255	323098	Bacteria	Proteobacteria	Alphaproteobacteria	Rhizobiales	Bradyrhizobiaceae	Nitrobacter	2	Rel[HS], Mesh1-L[H]
Oligotropha_carboxidovorans_OM5	504832	Bacteria	Proteobacteria	Alphaproteobacteria	Rhizobiales	Bradyrhizobiaceae	Oligotropha	1	Rel[HS]
Rhodopseudomonas_palustris_BisA53	316055	Bacteria	Proteobacteria	Alphaproteobacteria	Rhizobiales	Bradyrhizobiaceae	Rhodopseudomonas	2	Rel[HS], Mesh1[H]
Rhodopseudomonas_palustris_BisB18	316056	Bacteria	Proteobacteria	Alphaproteobacteria	Rhizobiales	Bradyrhizobiaceae	Rhodopseudomonas	2	gRel[S], Rel[HS]
Rhodopseudomonas_palustris_BisB5	316057	Bacteria	Proteobacteria	Alphaproteobacteria	Rhizobiales	Bradyrhizobiaceae	Rhodopseudomonas	1	Rel[HS]
Rhodopseudomonas_palustris_CGA009	258594	Bacteria	Proteobacteria	Alphaproteobacteria	Rhizobiales	Bradyrhizobiaceae	Rhodopseudomonas	2	Rel[HS], Mesh1[H]
Rhodopseudomonas_palustris_HaA2	316058	Bacteria	Proteobacteria	Alphaproteobacteria	Rhizobiales	Bradyrhizobiaceae	Rhodopseudomonas	2	Rel[HS], Mesh1[H]
Rhodopseudomonas_palustris_TIE_1	395960	Bacteria	Proteobacteria	Alphaproteobacteria	Rhizobiales	Bradyrhizobiaceae	Rhodopseudomonas	2	Rel[HS], Mesh1[H]
Brucella_abortus_bv__1_9_941	234	Bacteria	Proteobacteria	Alphaproteobacteria	Rhizobiales	Brucellaceae	Brucella	1	Rel[HS]
Brucella_abortus_S19	430066	Bacteria	Proteobacteria	Alphaproteobacteria	Rhizobiales	Brucellaceae	Brucella	1	Rel[HS]
Brucella_canis_ATCC_23365	483179	Bacteria	Proteobacteria	Alphaproteobacteria	Rhizobiales	Brucellaceae	Brucella	1	Rel[HS]
Brucella_melitensis	29459	Bacteria	Proteobacteria	Alphaproteobacteria	Rhizobiales	Brucellaceae	Brucella	1	Rel[HS]
Brucella_melitensis_ATCC_23457	546272	Bacteria	Proteobacteria	Alphaproteobacteria	Rhizobiales	Brucellaceae	Brucella	1	Rel[HS]
Brucella_melitensis_biovar_Abortus	235	Bacteria	Proteobacteria	Alphaproteobacteria	Rhizobiales	Brucellaceae	Brucella	1	Rel[HS]
Brucella_microti_CCM_4915	568815	Bacteria	Proteobacteria	Alphaproteobacteria	Rhizobiales	Brucellaceae	Brucella	1	Rel[HS]
Brucella_ovis	236	Bacteria	Proteobacteria	Alphaproteobacteria	Rhizobiales	Brucellaceae	Brucella	1	Rel[HS]
Brucella_suis_1330	204722	Bacteria	Proteobacteria	Alphaproteobacteria	Rhizobiales	Brucellaceae	Brucella	1	Rel[HS]
Brucella_suis_ATCC_23445	470137	Bacteria	Proteobacteria	Alphaproteobacteria	Rhizobiales	Brucellaceae	Brucella	1	Rel[HS]
Ochrobactrum_anthropi_ATCC_49188	439375	Bacteria	Proteobacteria	Alphaproteobacteria	Rhizobiales	Brucellaceae	Ochrobactrum	1	Rel[HS]
Methylobacterium_4_46	407	Bacteria	Proteobacteria	Alphaproteobacteria	Rhizobiales	Methylobacteriaceae	Methylobacterium	2	Rel[HS], pbcSpo[H]
Methylobacterium_chloromethanicum_CM4	440085	Bacteria	Proteobacteria	Alphaproteobacteria	Rhizobiales	Methylobacteriaceae	Methylobacterium	3	Rel[HS], Mesh1[H], pbcSpo[H]
Methylobacterium_extorquens_AM1	272630	Bacteria	Proteobacteria	Alphaproteobacteria	Rhizobiales	Methylobacteriaceae	Methylobacterium	2	Rel[HS], Mesh1[H]
Methylobacterium_extorquens_DM4	661410	Bacteria	Proteobacteria	Alphaproteobacteria	Rhizobiales	Methylobacteriaceae	Methylobacterium	2	Rel[HS], Mesh1[H]
Methylobacterium_extorquens_PA1	419610	Bacteria	Proteobacteria	Alphaproteobacteria	Rhizobiales	Methylobacteriaceae	Methylobacterium	2	Rel[HS], Mesh1[H]
Methylobacterium_nodulans_ORS_2060	460265	Bacteria	Proteobacteria	Alphaproteobacteria	Rhizobiales	Methylobacteriaceae	Methylobacterium	2	Rel[HS], pbcSpo[H]
Methylobacterium_populi_BJ001	441620	Bacteria	Proteobacteria	Alphaproteobacteria	Rhizobiales	Methylobacteriaceae	Methylobacterium	2	Rel[HS], Mesh1[H]
Methylobacterium_radiotolerans_JCM_2831	426355	Bacteria	Proteobacteria	Alphaproteobacteria	Rhizobiales	Methylobacteriaceae	Methylobacterium	4	divRel[S], Rel[HS], pbcSpo[H], pbcSpo[H]
Candidatus_Hodgkinia_cicadicola_Dsem	573234	Bacteria	Proteobacteria	Alphaproteobacteria	Rhizobiales	no info	Candidatus Hodgkinia	0
Mesorhizobium_BNC1	68287	Bacteria	Proteobacteria	Alphaproteobacteria	Rhizobiales	Phyllobacteriaceae	Mesorhizobium	1	Rel[HS]
Mesorhizobium_loti	381	Bacteria	Proteobacteria	Alphaproteobacteria	Rhizobiales	Phyllobacteriaceae	Mesorhizobium	1	Rel[HS]
Parvibaculum_lavamentivorans_DS-1	402881	Bacteria	Proteobacteria	Alphaproteobacteria	Rhizobiales	Phyllobacteriaceae	Parvibaculum	1	Rel[HS]
Agrobacterium_radiobacter_K84	311403	Bacteria	Proteobacteria	Alphaproteobacteria	Rhizobiales	Rhizobiaceae	Agrobacterium	1	Rel[HS]
Agrobacterium_tumefaciens_C58_Cereon	357	Bacteria	Proteobacteria	Alphaproteobacteria	Rhizobiales	Rhizobiaceae	Agrobacterium	1	Rel[HS]
Agrobacterium_vitis_S4	311402	Bacteria	Proteobacteria	Alphaproteobacteria	Rhizobiales	Rhizobiaceae	Agrobacterium	1	Rel[HS]
Candidatus_Liberibacter_asiaticus_psy62	537021	Bacteria	Proteobacteria	Alphaproteobacteria	Rhizobiales	Rhizobiaceae	Candidatus Liberibacter	0
Rhizobium_etli_CFN_42	347834	Bacteria	Proteobacteria	Alphaproteobacteria	Rhizobiales	Rhizobiaceae	Rhizobium	2	Rel[HS], pbcSpo[H]
Rhizobium_etli_CIAT_652	491916	Bacteria	Proteobacteria	Alphaproteobacteria	Rhizobiales	Rhizobiaceae	Rhizobium	2	Rel[HS], pbcSpo[H]
Rhizobium_leguminosarum_bv_viciae_3841	216596	Bacteria	Proteobacteria	Alphaproteobacteria	Rhizobiales	Rhizobiaceae	Rhizobium	3	Rel[HS], pbcSpo[H], capRel[S]
Rhizobium_leguminosarum_bv__trifolii_WSM1325	395491	Bacteria	Proteobacteria	Alphaproteobacteria	Rhizobiales	Rhizobiaceae	Rhizobium	2	Rel[HS], pbcSpo[H]
Rhizobium_leguminosarum_bv__trifolii_WSM2304	395492	Bacteria	Proteobacteria	Alphaproteobacteria	Rhizobiales	Rhizobiaceae	Rhizobium	2	Rel[HS], pbcSpo[H]
Rhizobium_NGR234	394	Bacteria	Proteobacteria	Alphaproteobacteria	Rhizobiales	Rhizobiaceae	Rhizobium	1	Rel[HS]
Sinorhizobium_medicae_WSM419	366394	Bacteria	Proteobacteria	Alphaproteobacteria	Rhizobiales	Rhizobiaceae	Sinorhizobium	1	Rel[HS]
Sinorhizobium_meliloti	382	Bacteria	Proteobacteria	Alphaproteobacteria	Rhizobiales	Rhizobiaceae	Sinorhizobium	1	Rel[HS]
Azorhizobium_caulinodans_ORS_571	438753	Bacteria	Proteobacteria	Alphaproteobacteria	Rhizobiales	Xanthobacteraceae	Azorhizobium	1	Rel[HS]
Xanthobacter_autotrophicus_Py2	78245	Bacteria	Proteobacteria	Alphaproteobacteria	Rhizobiales	Xanthobacteraceae	Xanthobacter	2	Rel[HS], Mesh1[H]
Hirschia_baltica_ATCC_49814	582402	Bacteria	Proteobacteria	Alphaproteobacteria	Rhodobacterales	Hyphomonadaceae	Hirschia	1	Rel[HS]
Hyphomonas_neptunium_ATCC_15444	228405	Bacteria	Proteobacteria	Alphaproteobacteria	Rhodobacterales	Hyphomonadaceae	Hyphomonas	1	Rel[HS]
Maricaulis_maris_MCS10	394221	Bacteria	Proteobacteria	Alphaproteobacteria	Rhodobacterales	Hyphomonadaceae	Maricaulis	1	Rel[HS]
Dinoroseobacter_shibae_DFL_12	398580	Bacteria	Proteobacteria	Alphaproteobacteria	Rhodobacterales	Rhodobacteraceae	Dinoroseobacter	1	Rel[HS]
Jannaschia_CCS1	188905	Bacteria	Proteobacteria	Alphaproteobacteria	Rhodobacterales	Rhodobacteraceae	Jannaschia	2	Rel[HS], capRel[S]
Paracoccus_denitrificans_PD1222	318586	Bacteria	Proteobacteria	Alphaproteobacteria	Rhodobacterales	Rhodobacteraceae	Paracoccus	1	Rel[HS]
Rhodobacter_sphaeroides_2_4_1	272943	Bacteria	Proteobacteria	Alphaproteobacteria	Rhodobacterales	Rhodobacteraceae	Rhodobacter	1	Rel[HS]
Rhodobacter_sphaeroides_ATCC_17025	349102	Bacteria	Proteobacteria	Alphaproteobacteria	Rhodobacterales	Rhodobacteraceae	Rhodobacter	2	Rel[HS], Mesh1[H]
Rhodobacter_sphaeroides_ATCC_17029	349101	Bacteria	Proteobacteria	Alphaproteobacteria	Rhodobacterales	Rhodobacteraceae	Rhodobacter	1	Rel[HS]
Rhodobacter_sphaeroides_KD131	557760	Bacteria	Proteobacteria	Alphaproteobacteria	Rhodobacterales	Rhodobacteraceae	Rhodobacter	1	Rel[HS]
Roseobacter_denitrificans_OCh_114	375451	Bacteria	Proteobacteria	Alphaproteobacteria	Rhodobacterales	Rhodobacteraceae	Roseobacter	1	Rel[HS]
Ruegeria_pomeroyi_DSS_3	246200	Bacteria	Proteobacteria	Alphaproteobacteria	Rhodobacterales	Rhodobacteraceae	Ruegeria	1	Rel[HS]
Silicibacter_TM1040	97050	Bacteria	Proteobacteria	Alphaproteobacteria	Rhodobacterales	Rhodobacteraceae	Silicibacter	1	Rel[HS]
Acetobacter_pasteurianus_IFO_3283_01	634452	Bacteria	Proteobacteria	Alphaproteobacteria	Rhodospirillales	Acetobacteraceae	Acetobacter	2	Rel[HS], capRel[S]
Acidiphilium_cryptum_JF-5	349163	Bacteria	Proteobacteria	Alphaproteobacteria	Rhodospirillales	Acetobacteraceae	Acidiphilium	1	Rel[HS]
Gluconacetobacter_diazotrophicus_PAl_5_FAPERJ	89583	Bacteria	Proteobacteria	Alphaproteobacteria	Rhodospirillales	Acetobacteraceae	Gluconacetobacter	1	Rel[HS]
Gluconacetobacter_diazotrophicus_PAl_5_JGI	89583	Bacteria	Proteobacteria	Alphaproteobacteria	Rhodospirillales	Acetobacteraceae	Gluconacetobacter	1	Rel[HS]
Gluconobacter_oxydans_621H	290633	Bacteria	Proteobacteria	Alphaproteobacteria	Rhodospirillales	Acetobacteraceae	Gluconobacter	1	Rel[HS]
Granulobacter_bethesdensis_CGDNIH1	391165	Bacteria	Proteobacteria	Alphaproteobacteria	Rhodospirillales	Acetobacteraceae	Granulibacter	1	Rel[HS]
Magnetospirillum_magneticum_AMB-1	342108	Bacteria	Proteobacteria	Alphaproteobacteria	Rhodospirillales	Rhodospirillaceae	Magnetospirillum	3	Rel[HS], pbcSpo2[H], pbcSpo2[H]
Rhodospirillum_centenum_SW	414684	Bacteria	Proteobacteria	Alphaproteobacteria	Rhodospirillales	Rhodospirillaceae	Rhodospirillum	1	Rel[HS]
Rhodospirillum_rubrum_ATCC_11170	269796	Bacteria	Proteobacteria	Alphaproteobacteria	Rhodospirillales	Rhodospirillaceae	Rhodospirillum	1	Rel[HS]
Anaplasma_marginale_Florida	320483	Bacteria	Proteobacteria	Alphaproteobacteria	Rickettsiales	Anaplasmataceae	Anaplasma	0
Anaplasma_marginale_St_Maries	234826	Bacteria	Proteobacteria	Alphaproteobacteria	Rickettsiales	Anaplasmataceae	Anaplasma	0
Anaplasma_phagocytophilum_HZ	212042	Bacteria	Proteobacteria	Alphaproteobacteria	Rickettsiales	Anaplasmataceae	Anaplasma	0
Ehrlichia_canis_Jake	269484	Bacteria	Proteobacteria	Alphaproteobacteria	Rickettsiales	Anaplasmataceae	Ehrlichia	0
Ehrlichia_chaffeensis_Arkansas	205920	Bacteria	Proteobacteria	Alphaproteobacteria	Rickettsiales	Anaplasmataceae	Ehrlichia	0
Ehrlichia_ruminantium_Gardel	943	Bacteria	Proteobacteria	Alphaproteobacteria	Rickettsiales	Anaplasmataceae	Ehrlichia	0
Ehrlichia_ruminantium_str._Welgevonden_CIRAD	943	Bacteria	Proteobacteria	Alphaproteobacteria	Rickettsiales	Anaplasmataceae	Ehrlichia	0
Ehrlichia_ruminantium_Welgevonden_UPSA	943	Bacteria	Proteobacteria	Alphaproteobacteria	Rickettsiales	Anaplasmataceae	Ehrlichia	0
Neorickettsia_risticii_Illinois	434131	Bacteria	Proteobacteria	Alphaproteobacteria	Rickettsiales	Anaplasmataceae	Neorickettsia	0
Neorickettsia_sennetsu_Miyayama	222891	Bacteria	Proteobacteria	Alphaproteobacteria	Rickettsiales	Anaplasmataceae	Neorickettsia	0
Candidatus_Pelagibacter_ubique_HTCC1062	335992	Bacteria	Proteobacteria	Alphaproteobacteria	Rickettsiales	no info	Candidatus Pelagibacter	1	Rel[HS]
Orientia_tsutsugamushi_Boryong	357244	Bacteria	Proteobacteria	Alphaproteobacteria	Rickettsiales	Rickettsiaceae	Orientia	24	Rel[HS], rickSpo[H], rickSpo[H], rickSpo[H], rickSpo[H], rickSpo[H], rickSpo[H], rickSpo[H], rickSpo[H], rickSpo[H], rickSpo[H], rickSpo[H], rickSpo[H], rickSpo[H], rickSpo[H], rickSpo[H], rickSpo[H],
Orientia_tsutsugamushi_Ikeda	334380	Bacteria	Proteobacteria	Alphaproteobacteria	Rickettsiales	Rickettsiaceae	Orientia	40	Rel[HS], rickSpo[H], rickSpo[H], rickSpo[H], rickSpo[H], rickSpo[H], rickSpo[H], rickSpo[H], rickSpo[H], rickSpo[H], rickSpo[H], rickSpo[H], rickSpo[H], rickSpo[H], rickSpo[H], rickSpo[H], rickSpo[H],
Rickettsia_africae_ESF_5	347255	Bacteria	Proteobacteria	Alphaproteobacteria	Rickettsiales	Rickettsiaceae	Rickettsia	5	rickSpo[H], rickSpo[H], rickSpo[H], rickSpo[H], rickRel[S]
Rickettsia_akari_Hartford	780	Bacteria	Proteobacteria	Alphaproteobacteria	Rickettsiales	Rickettsiaceae	Rickettsia	3	rickSpo[H], rickRel[S], rickRel[S]
Rickettsia_bellii_OSU_85-389	391896	Bacteria	Proteobacteria	Alphaproteobacteria	Rickettsiales	Rickettsiaceae	Rickettsia	10	rickSpo[H], rickSpo[H], rickSpo[H], rickSpo[H], rickSpo[H], rickSpo[H], rickSpo[H], rickRel[S], rickRel[S], rickRel[S]
Rickettsia_bellii_RML369-C	336407	Bacteria	Proteobacteria	Alphaproteobacteria	Rickettsiales	Rickettsiaceae	Rickettsia	10	rickSpo[H], rickSpo[H], rickSpo[H], rickSpo[H], rickSpo[H], rickSpo[H], rickSpo[H], rickRel[S], rickRel[S], rickRel[S]
Rickettsia_canadensis_McKiel	780	Bacteria	Proteobacteria	Alphaproteobacteria	Rickettsiales	Rickettsiaceae	Rickettsia	5	rickSpo[H], rickSpo[H], rickSpo[H], rickRel[S], rickRel[S]
Rickettsia_conorii	781	Bacteria	Proteobacteria	Alphaproteobacteria	Rickettsiales	Rickettsiaceae	Rickettsia	5	rickSpo[H], rickSpo[H], rickSpo[H], rickSpo[H], rickSpo[H]
Rickettsia_felis_URRWXCal2	315456	Bacteria	Proteobacteria	Alphaproteobacteria	Rickettsiales	Rickettsiaceae	Rickettsia	14	rickSpo[H], rickSpo[H], rickSpo[H], rickSpo[H], rickSpo[H], rickSpo[H], rickSpo[H], rickSpo[H], rickSpo[H], rickSpo[H], rickSpo[H], RelA[S], rickRel[HS], rickRel[S]
Rickettsia_massiliae_MTU5	416276	Bacteria	Proteobacteria	Alphaproteobacteria	Rickettsiales	Rickettsiaceae	Rickettsia	6	rickSpo[H], rickSpo[H], rickSpo[H], rickRel[HS], rickRel[S], rickRel[S]
Rickettsia_peacockii_Rustic	562019	Bacteria	Proteobacteria	Alphaproteobacteria	Rickettsiales	Rickettsiaceae	Rickettsia	3	rickSpo[H], rickSpo[H], rickRel[S]
Rickettsia_prowazekii	782	Bacteria	Proteobacteria	Alphaproteobacteria	Rickettsiales	Rickettsiaceae	Rickettsia	0
Rickettsia_rickettsii_Iowa	452659	Bacteria	Proteobacteria	Alphaproteobacteria	Rickettsiales	Rickettsiaceae	Rickettsia	5	rickSpo[H], rickSpo[H], rickSpo[H], rickRel[S], rickSpo[H]
Rickettsia_rickettsii_Sheila_Smith	392021	Bacteria	Proteobacteria	Alphaproteobacteria	Rickettsiales	Rickettsiaceae	Rickettsia	6	rickSpo[H], rickSpo[H], rickSpo[H], rickSpo[H], rickRel[S], rickSpo[H]
Rickettsia_typhi_wilmington	257363	Bacteria	Proteobacteria	Alphaproteobacteria	Rickettsiales	Rickettsiaceae	Rickettsia	4	rickSpo[H], rickSpo[H], rickRel[S], rickRel[S]
Wolbachia_endosymbiont_of_Brugia_malayi_TRS	953	Bacteria	Proteobacteria	Alphaproteobacteria	Rickettsiales	Rickettsiaceae	Wolbachia	0
Wolbachia_endosymbiont_of_Culex_quinquefasciatus_Pel	570417	Bacteria	Proteobacteria	Alphaproteobacteria	Rickettsiales	Rickettsiaceae	Wolbachia	0
Wolbachia_endosymbiont_of_Drosophila_melanogaster	163164	Bacteria	Proteobacteria	Alphaproteobacteria	Rickettsiales	Rickettsiaceae	Wolbachia	0
Wolbachia_wRi	953	Bacteria	Proteobacteria	Alphaproteobacteria	Rickettsiales	Rickettsiaceae	Wolbachia	0
Erythrobacter_litoralis_HTCC2594	314225	Bacteria	Proteobacteria	Alphaproteobacteria	Sphingomonadales	Erythrobacteraceae	Erythrobacter	1	Rel[HS]
Novosphingobium_aromaticivorans_DSM_12444	279238	Bacteria	Proteobacteria	Alphaproteobacteria	Sphingomonadales	Sphingomonadaceae	Novosphingobium	1	Rel[HS]
Sphingomonas_wittichii_RW1	392499	Bacteria	Proteobacteria	Alphaproteobacteria	Sphingomonadales	Sphingomonadaceae	Sphingomonas	2	Rel[HS], paSpo[H]
Sphingopyxis_alaskensis_RB2256	317655	Bacteria	Proteobacteria	Alphaproteobacteria	Sphingomonadales	Sphingomonadaceae	Sphingopyxis	1	Rel[HS]
Zymomonas_mobilis_NCIMB_11163	622759	Bacteria	Proteobacteria	Alphaproteobacteria	Sphingomonadales	Sphingomonadaceae	Zymomonas	1	Rel[HS]
Zymomonas_mobilis_ZM4	541	Bacteria	Proteobacteria	Alphaproteobacteria	Sphingomonadales	Sphingomonadaceae	Zymomonas	1	Rel[HS]
Bordetella_avium_197N	360910	Bacteria	Proteobacteria	Betaproteobacteria	Burkholderiales	Alcaligenaceae	Bordetella	2	RelA[hS], SpoT[HS]
Bordetella_bronchiseptica	518	Bacteria	Proteobacteria	Betaproteobacteria	Burkholderiales	Alcaligenaceae	Bordetella	2	RelA[hS], SpoT[HS]
Bordetella_parapertussis	519	Bacteria	Proteobacteria	Betaproteobacteria	Burkholderiales	Alcaligenaceae	Bordetella	1	*(RelA[hS]), SpoT[HS]
Bordetella_pertussis	520	Bacteria	Proteobacteria	Betaproteobacteria	Burkholderiales	Alcaligenaceae	Bordetella	2	RelA[hS], SpoT[HS]
Bordetella_petrii	94624	Bacteria	Proteobacteria	Betaproteobacteria	Burkholderiales	Alcaligenaceae	Bordetella	2	RelA[hS], SpoT[HS]
Burkholderia_383	32008	Bacteria	Proteobacteria	Betaproteobacteria	Burkholderiales	Burkholderiaceae	Burkholderia	3	Mesh1[H], RelA[hS], SpoT[HS]
Burkholderia_ambifaria_MC40_6	398577	Bacteria	Proteobacteria	Betaproteobacteria	Burkholderiales	Burkholderiaceae	Burkholderia	3	Mesh1[H], RelA[hS], SpoT[HS]
Burkholderia_cenocepacia_AU_1054	331271	Bacteria	Proteobacteria	Betaproteobacteria	Burkholderiales	Burkholderiaceae	Burkholderia	4	Mesh1[H], RelA[hS], capRel[S], SpoT[HS]
Burkholderia_cenocepacia_HI2424	331272	Bacteria	Proteobacteria	Betaproteobacteria	Burkholderiales	Burkholderiaceae	Burkholderia	4	Mesh1[H], RelA[hS], capRel[S], SpoT[HS]
Burkholderia_cenocepacia_J2315	216591	Bacteria	Proteobacteria	Betaproteobacteria	Burkholderiales	Burkholderiaceae	Burkholderia	3	Mesh1[H], RelA[hS], SpoT[HS]
Burkholderia_cenocepacia_MC0_3	406425	Bacteria	Proteobacteria	Betaproteobacteria	Burkholderiales	Burkholderiaceae	Burkholderia	4	Mesh1[H], RelA[hS], capRel[S], SpoT[HS]
Burkholderia_cepacia_AMMD	339670	Bacteria	Proteobacteria	Betaproteobacteria	Burkholderiales	Burkholderiaceae	Burkholderia	3	Mesh1[H], RelA[hS], SpoT[HS]
Burkholderia_glumae_BGR1	626418	Bacteria	Proteobacteria	Betaproteobacteria	Burkholderiales	Burkholderiaceae	Burkholderia	2	RelA[hS], SpoT[HS]
Burkholderia_mallei_ATCC_23344	243160	Bacteria	Proteobacteria	Betaproteobacteria	Burkholderiales	Burkholderiaceae	Burkholderia	2	RelA[hS], SpoT[HS]
Burkholderia_mallei_NCTC_10229	412022	Bacteria	Proteobacteria	Betaproteobacteria	Burkholderiales	Burkholderiaceae	Burkholderia	2	RelA[hS], SpoT[HS]
Burkholderia_mallei_NCTC_10247	320389	Bacteria	Proteobacteria	Betaproteobacteria	Burkholderiales	Burkholderiaceae	Burkholderia	2	RelA[hS], SpoT[HS]
Burkholderia_mallei_SAVP1	320388	Bacteria	Proteobacteria	Betaproteobacteria	Burkholderiales	Burkholderiaceae	Burkholderia	2	RelA[hS], SpoT[HS]
Burkholderia_multivorans_ATCC_17616_JGI	32008	Bacteria	Proteobacteria	Betaproteobacteria	Burkholderiales	Burkholderiaceae	Burkholderia	3	Mesh1[H], RelA[hS], SpoT[HS]
Burkholderia_multivorans_ATCC_17616_Tohoku	32008	Bacteria	Proteobacteria	Betaproteobacteria	Burkholderiales	Burkholderiaceae	Burkholderia	3	Mesh1[H], RelA[hS], SpoT[HS]
Burkholderia_phymatum_STM815	391038	Bacteria	Proteobacteria	Betaproteobacteria	Burkholderiales	Burkholderiaceae	Burkholderia	3	Mesh1[H], RelA[hS], SpoT[HS]
Burkholderia_phytofirmans_PsJN	398527	Bacteria	Proteobacteria	Betaproteobacteria	Burkholderiales	Burkholderiaceae	Burkholderia	2	RelA[hS], SpoT[HS]
Burkholderia_pseudomallei_1106a	357348	Bacteria	Proteobacteria	Betaproteobacteria	Burkholderiales	Burkholderiaceae	Burkholderia	2	RelA[hS], SpoT[HS]
Burkholderia_pseudomallei_1710b	320372	Bacteria	Proteobacteria	Betaproteobacteria	Burkholderiales	Burkholderiaceae	Burkholderia	2	RelA[hS], SpoT[HS]
Burkholderia_pseudomallei_668	320373	Bacteria	Proteobacteria	Betaproteobacteria	Burkholderiales	Burkholderiaceae	Burkholderia	2	RelA[hS], SpoT[HS]
Burkholderia_pseudomallei_K96243	272560	Bacteria	Proteobacteria	Betaproteobacteria	Burkholderiales	Burkholderiaceae	Burkholderia	3	fpRel[S], RelA[hS], SpoT[HS]
Burkholderia_pseudomallei_MSHR346	536230	Bacteria	Proteobacteria	Betaproteobacteria	Burkholderiales	Burkholderiaceae	Burkholderia	2	RelA[hS], SpoT[HS]
Burkholderia_thailandensis_E264	271848	Bacteria	Proteobacteria	Betaproteobacteria	Burkholderiales	Burkholderiaceae	Burkholderia	2	RelA[hS], SpoT[HS]
Burkholderia_vietnamiensis_G4	269482	Bacteria	Proteobacteria	Betaproteobacteria	Burkholderiales	Burkholderiaceae	Burkholderia	4	Mesh1[H], paSpo[H], RelA[hS], SpoT[HS]
Burkholderia_xenovorans_LB400	266265	Bacteria	Proteobacteria	Betaproteobacteria	Burkholderiales	Burkholderiaceae	Burkholderia	2	RelA[hS], SpoT[HS]
Cupriavidus_taiwanensis	164546	Bacteria	Proteobacteria	Betaproteobacteria	Burkholderiales	Burkholderiaceae	Cupriavidus	2	RelA[hS], SpoT[HS]
Polynucleobacter_necessarius_asymbioticus_QLW_P1DMWA_1	44013	Bacteria	Proteobacteria	Betaproteobacteria	Burkholderiales	Burkholderiaceae	Polynucleobacter	2	RelA[hS], SpoT[HS]
Polynucleobacter_necessarius_STIR1	452638	Bacteria	Proteobacteria	Betaproteobacteria	Burkholderiales	Burkholderiaceae	Polynucleobacter	2	RelA[hS], SpoT[HS]
Ralstonia_eutropha_H16	381666	Bacteria	Proteobacteria	Betaproteobacteria	Burkholderiales	Burkholderiaceae	Cupriavidus	2	RelA[hS], SpoT[HS]
Ralstonia_eutropha_JMP134	264198	Bacteria	Proteobacteria	Betaproteobacteria	Burkholderiales	Burkholderiaceae	Cupriavidus	2	RelA[hS], SpoT[HS]
Ralstonia_metallidurans_CH34	266264	Bacteria	Proteobacteria	Betaproteobacteria	Burkholderiales	Burkholderiaceae	Cupriavidus	2	RelA[hS], SpoT[HS]
Ralstonia_pickettii_12D	428406	Bacteria	Proteobacteria	Betaproteobacteria	Burkholderiales	Burkholderiaceae	Ralstonia	2	RelA[hS], SpoT[HS]
Ralstonia_pickettii_12J	402626	Bacteria	Proteobacteria	Betaproteobacteria	Burkholderiales	Burkholderiaceae	Ralstonia	3	bdRel[S], RelA[hS], SpoT[HS]
Ralstonia_solanacearum	305	Bacteria	Proteobacteria	Betaproteobacteria	Burkholderiales	Burkholderiaceae	Ralstonia	3	pbcSpo2[H], RelA[hS], SpoT[HS]
Acidovorax_avenae_citrulli_AAC00-1	12916	Bacteria	Proteobacteria	Betaproteobacteria	Burkholderiales	Comamonadaceae	Acidovorax	3	bdRel[S], RelA[hS], SpoT[HS]
Acidovorax_JS42	12916	Bacteria	Proteobacteria	Betaproteobacteria	Burkholderiales	Comamonadaceae	Acidovorax	3	bdRel[S], RelA[hS], SpoT[HS]
Comamonas_testosteroni_CNB_1	543891	Bacteria	Proteobacteria	Betaproteobacteria	Burkholderiales	Comamonadaceae	Comamonas	3	fpRel[S], RelA[hS], SpoT[HS]
Delftia_acidovorans_SPH-1	398578	Bacteria	Proteobacteria	Betaproteobacteria	Burkholderiales	Comamonadaceae	Delftia	2	RelA[hS], SpoT[HS]
Diaphorobacter_TPSY	238749	Bacteria	Proteobacteria	Betaproteobacteria	Burkholderiales	Comamonadaceae	Diaphorobacter	3	bdRel[S], RelA[hS], SpoT[HS]
Polaromonas_JS666	52972	Bacteria	Proteobacteria	Betaproteobacteria	Burkholderiales	Comamonadaceae	Polaromonas	2	RelA[hS], SpoT[HS]
Polaromonas_naphthalenivorans_CJ2	365044	Bacteria	Proteobacteria	Betaproteobacteria	Burkholderiales	Comamonadaceae	Polaromonas	2	RelA[hS], SpoT[HS]
Rhodoferax_ferrireducens_T118	338969	Bacteria	Proteobacteria	Betaproteobacteria	Burkholderiales	Comamonadaceae	Rhodoferax	2	RelA[hS], SpoT[HS]
Variovorax_paradoxus_S110	543728	Bacteria	Proteobacteria	Betaproteobacteria	Burkholderiales	Comamonadaceae	Variovorax	2	RelA[hS], SpoT[HS]
Verminephrobacter_eiseniae_EF01-2	391735	Bacteria	Proteobacteria	Betaproteobacteria	Burkholderiales	Comamonadaceae	Verminephrobacter	2	RelA[hS], SpoT[HS]
Leptothrix_cholodnii_SP_6	395495	Bacteria	Proteobacteria	Betaproteobacteria	Burkholderiales	no info	Leptothrix	2	RelA[hS], SpoT[HS]
Methylibium_petroleiphilum_PM1	420662	Bacteria	Proteobacteria	Betaproteobacteria	Burkholderiales	no info	Methylibium	3	RelA[hS], SpoT[HS], paSpo[H]
Herminiimonas_arsenicoxydans	204773	Bacteria	Proteobacteria	Betaproteobacteria	Burkholderiales	Oxalobacteraceae	Herminiimonas	2	RelA[hS], SpoT[HS]
Janthinobacterium_Marseille	29580	Bacteria	Proteobacteria	Betaproteobacteria	Burkholderiales	Oxalobacteraceae	Janthinobacterium	2	RelA[hS], SpoT[HS]
Thiobacillus_denitrificans_ATCC_25259	292415	Bacteria	Proteobacteria	Betaproteobacteria	Hydrogenophilales	Hydrogenophilaceae	Thiobacillus	2	RelA[hS], SpoT[HS]
Methylobacillus_flagellatus_KT	265072	Bacteria	Proteobacteria	Betaproteobacteria	Methylophilales	Methylophilaceae	Methylobacillus	2	RelA[hS], SpoT[HS]
Methylotenera_mobilis_JLW8	583345	Bacteria	Proteobacteria	Betaproteobacteria	Methylophilales	Methylophilaceae	Methylotenera	2	RelA[hS]†, SpoT[HS]
Methylovorus_SIP3_4	81682	Bacteria	Proteobacteria	Betaproteobacteria	Methylophilales	Methylophilaceae	Methylovorus	1	SpoT[HS]
Chromobacterium_violaceum	536	Bacteria	Proteobacteria	Betaproteobacteria	Neisseriales	Neisseriaceae	Chromobacterium	2	RelA[hS], SpoT[HS]
Laribacter_hongkongensis_HLHK9	557598	Bacteria	Proteobacteria	Betaproteobacteria	Neisseriales	Neisseriaceae	Laribacter	2	RelA[hS], SpoT[HS]
Neisseria_gonorrhoeae_FA_1090	242231	Bacteria	Proteobacteria	Betaproteobacteria	Neisseriales	Neisseriaceae	Neisseria	4	fpRel2[S], gRel[S], RelA[hS], SpoT[HS]
Neisseria_gonorrhoeae_NCCP11945	521006	Bacteria	Proteobacteria	Betaproteobacteria	Neisseriales	Neisseriaceae	Neisseria	3	fpRel2[S], RelA[hS], SpoT[HS]
Neisseria_meningitidis_053442	374833	Bacteria	Proteobacteria	Betaproteobacteria	Neisseriales	Neisseriaceae	Neisseria	3	fpRel2[S], RelA[hS], SpoT[HS]
Neisseria_meningitidis_alpha14	662598	Bacteria	Proteobacteria	Betaproteobacteria	Neisseriales	Neisseriaceae	Neisseria	2	RelA[hS], SpoT[HS]
Neisseria_meningitidis_FAM18	272831	Bacteria	Proteobacteria	Betaproteobacteria	Neisseriales	Neisseriaceae	Neisseria	2	RelA[hS], SpoT[HS]
Neisseria_meningitidis_MC58	122586	Bacteria	Proteobacteria	Betaproteobacteria	Neisseriales	Neisseriaceae	Neisseria	2	RelA[hS], SpoT[HS]
Neisseria_meningitidis_Z2491	122587	Bacteria	Proteobacteria	Betaproteobacteria	Neisseriales	Neisseriaceae	Neisseria	2	RelA[hS], SpoT[HS]
Nitrosomonas_europaea	915	Bacteria	Proteobacteria	Betaproteobacteria	Nitrosomonadales	Nitrosomonadaceae	Nitrosomonas	1	SpoT[HS]
Nitrosomonas_eutropha_C71	335283	Bacteria	Proteobacteria	Betaproteobacteria	Nitrosomonadales	Nitrosomonadaceae	Nitrosomonas	1	SpoT[HS]
Nitrosospira_multiformis_ATCC_25196	323848	Bacteria	Proteobacteria	Betaproteobacteria	Nitrosomonadales	Nitrosomonadaceae	Nitrosospira	2	RelA[hS], SpoT[HS]
Candidatus_Accumulibacter_phosphatis_clade_IIA_UW_1	327159	Bacteria	Proteobacteria	Betaproteobacteria	no info	no info	Candidatus Accumulibacter	3	divSpo[H], RelA[hS], SpoT[HS]
Aromatoleum_aromaticum_EbN1	76114	Bacteria	Proteobacteria	Betaproteobacteria	Rhodocyclales	Rhodocyclaceae	Aromatoleum	2	RelA[hS], SpoT[HS]
Azoarcus_BH72	12960	Bacteria	Proteobacteria	Betaproteobacteria	Rhodocyclales	Rhodocyclaceae	Azoarcus	2	RelA[hS], SpoT[HS]
Dechloromonas_aromatica_RCB	159087	Bacteria	Proteobacteria	Betaproteobacteria	Rhodocyclales	Rhodocyclaceae	Dechloromonas	2	RelA[hS], SpoT[HS]
Thauera_MZ1T	33057	Bacteria	Proteobacteria	Betaproteobacteria	Rhodocyclales	Rhodocyclaceae	Thauera	3	Mesh1-L[H], RelA[hS], SpoT[HS]
Bdellovibrio_bacteriovorus	959	Bacteria	Proteobacteria	Deltaproteobacteria	Bdellovibrionales	Bdellovibrionaceae	Bdellovibrio	1	Rel[HS]
Candidatus_Desulfococcus_oleovorans_Hxd3	96561	Bacteria	Proteobacteria	Deltaproteobacteria	Desulfobacterales	Desulfobacteraceae	Desulfococcus	1	Rel[HS]
Desulfatibacillum_alkenivorans_AK_01	439235	Bacteria	Proteobacteria	Deltaproteobacteria	Desulfobacterales	Desulfobacteraceae	Desulfatibacillum	2	Rel[HS], pbcSpo[H]
Desulfobacterium_autotrophicum_HRM2	177437	Bacteria	Proteobacteria	Deltaproteobacteria	Desulfobacterales	Desulfobacteraceae	Desulfobacterium	2	divRel[S], Rel[HS]
Desulfotalea_psychrophila_LSv54	177439	Bacteria	Proteobacteria	Deltaproteobacteria	Desulfobacterales	Desulfobulbaceae	Desulfotalea	4	Rel[HS], RshD[HS], pbcSpo2[H], pbcSpo2[H]
Desulfohalobium_retbaense_DSM_5692	485915	Bacteria	Proteobacteria	Deltaproteobacteria	Desulfovibrionales	Desulfohalobiaceae	Desulfohalobium	1	Rel[HS]
Desulfomicrobium_baculatum_DSM_4028	525897	Bacteria	Proteobacteria	Deltaproteobacteria	Desulfovibrionales	Desulfomicrobiaceae	Desulfomicrobium	2	Rel[HS], capRel[S]
Desulfovibrio_desulfuricans_ATCC_27774	872	Bacteria	Proteobacteria	Deltaproteobacteria	Desulfovibrionales	Desulfovibrionaceae	Desulfovibrio	1	Rel[HS]
Desulfovibrio_desulfuricans_G20	207559	Bacteria	Proteobacteria	Deltaproteobacteria	Desulfovibrionales	Desulfovibrionaceae	Desulfovibrio	1	Rel[HS]
Desulfovibrio_magneticus_RS_1	573370	Bacteria	Proteobacteria	Deltaproteobacteria	Desulfovibrionales	Desulfovibrionaceae	Desulfovibrio	1	Rel[HS]
Desulfovibrio_salexigens_DSM_2638	526222	Bacteria	Proteobacteria	Deltaproteobacteria	Desulfovibrionales	Desulfovibrionaceae	Desulfovibrio	2	divRel[S], Rel[HS]
Desulfovibrio_vulgaris_DP4	391774	Bacteria	Proteobacteria	Deltaproteobacteria	Desulfovibrionales	Desulfovibrionaceae	Desulfovibrio	1	Rel[HS]
Desulfovibrio_vulgaris_Hildenborough	882	Bacteria	Proteobacteria	Deltaproteobacteria	Desulfovibrionales	Desulfovibrionaceae	Desulfovibrio	1	Rel[HS]
Desulfovibrio_vulgaris__Miyazaki_F_	883	Bacteria	Proteobacteria	Deltaproteobacteria	Desulfovibrionales	Desulfovibrionaceae	Desulfovibrio	1	Rel[HS]
Lawsonia_intracellularis_PHE_MN1-00	363253	Bacteria	Proteobacteria	Deltaproteobacteria	Desulfovibrionales	Desulfovibrionaceae	Lawsonia	1	Rel[HS]
Geobacter_bemidjiensis_Bem	404380	Bacteria	Proteobacteria	Deltaproteobacteria	Desulfuromonadales	Geobacteraceae	Geobacter	2	bdRel[S], Rel[HS]
Geobacter_FRC_32	28231	Bacteria	Proteobacteria	Deltaproteobacteria	Desulfuromonadales	Geobacteraceae	Geobacter	1	Rel[HS]
Geobacter_lovleyi_SZ	398767	Bacteria	Proteobacteria	Deltaproteobacteria	Desulfuromonadales	Geobacteraceae	Geobacter	2	Rel[HS], pbcSpo2[H]
Geobacter_M21	28231	Bacteria	Proteobacteria	Deltaproteobacteria	Desulfuromonadales	Geobacteraceae	Geobacter	3	bdRel[S], Rel[HS], capRel[S]
Geobacter_metallireducens_GS-15	269799	Bacteria	Proteobacteria	Deltaproteobacteria	Desulfuromonadales	Geobacteraceae	Geobacter	1	Rel[HS]
Geobacter_sulfurreducens	35554	Bacteria	Proteobacteria	Deltaproteobacteria	Desulfuromonadales	Geobacteraceae	Geobacter	2	Rel[HS], capRel[S]
Geobacter_uraniumreducens_Rf4	351605	Bacteria	Proteobacteria	Deltaproteobacteria	Desulfuromonadales	Geobacteraceae	Geobacter	1	Rel[HS]
Pelobacter_carbinolicus	19	Bacteria	Proteobacteria	Deltaproteobacteria	Desulfuromonadales	Pelobacteraceae	Pelobacter	2	Rel[HS], RshD[HS]
Pelobacter_propionicus_DSM_2379	338966	Bacteria	Proteobacteria	Deltaproteobacteria	Desulfuromonadales	Pelobacteraceae	Pelobacter	4	bdRel[S], fpRel[S], Rel[HS], paSpo[H]
Haliangium_ochraceum_DSM_14365	502025	Bacteria	Proteobacteria	Deltaproteobacteria	Myxococcales	Haliangiaceae	Haliangium	1	Rel[HS]
Anaeromyxobacter_dehalogenans_2CP-C	290397	Bacteria	Proteobacteria	Deltaproteobacteria	Myxococcales	Myxococcaceae	Anaeromyxobacter	2	Rel[HS], Mesh1-L[H]
Anaeromyxobacter_dehalogenans_2CP_1	455488	Bacteria	Proteobacteria	Deltaproteobacteria	Myxococcales	Myxococcaceae	Anaeromyxobacter	2	Rel[HS], Mesh1-L[H]
Anaeromyxobacter_Fw109-5	161492	Bacteria	Proteobacteria	Deltaproteobacteria	Myxococcales	Myxococcaceae	Anaeromyxobacter	2	Rel[HS], pbcSpo[H]
Anaeromyxobacter_K	161492	Bacteria	Proteobacteria	Deltaproteobacteria	Myxococcales	Myxococcaceae	Anaeromyxobacter	2	Rel[HS], Mesh1-L[H]
Myxococcus_xanthus_DK_1622	246197	Bacteria	Proteobacteria	Deltaproteobacteria	Myxococcales	Myxococcaceae	Myxococcus	3	Rel[HS], pbcSpo[H], SYNTH[S]
Sorangium_cellulosum__So_ce_56_	448385	Bacteria	Proteobacteria	Deltaproteobacteria	Myxococcales	Polyangiaceae	Sorangium	4	Rel[HS], Mesh1-L[H], divSpo[H], SYNTH[S]
Syntrophus_aciditrophicus_SB	56780	Bacteria	Proteobacteria	Deltaproteobacteria	Syntrophobacterales	Syntrophaceae	Syntrophus	4	fpRel[S], Rel[HS], Rel[HS]†, Mesh1-L[H]
Syntrophobacter_fumaroxidans_MPOB	335543	Bacteria	Proteobacteria	Deltaproteobacteria	Syntrophobacterales	Syntrophobacteraceae	Syntrophobacter	3	Rel[HS], RshD[HS], Mesh1[H]
Arcobacter_butzleri_RM4018	367737	Bacteria	Proteobacteria	Epsilonproteobacteria	Campylobacterales	Campylobacteraceae	Arcobacter	1	Rel[HS]
Campylobacter_concisus_13826	360104	Bacteria	Proteobacteria	Epsilonproteobacteria	Campylobacterales	Campylobacteraceae	Campylobacter	1	Rel[HS]
Campylobacter_curvus_525_92	360105	Bacteria	Proteobacteria	Epsilonproteobacteria	Campylobacterales	Campylobacteraceae	Campylobacter	1	Rel[HS]
Campylobacter_fetus_82-40	194	Bacteria	Proteobacteria	Epsilonproteobacteria	Campylobacterales	Campylobacteraceae	Campylobacter	1	Rel[HS]
Campylobacter_hominis_ATCC_BAA-381	360107	Bacteria	Proteobacteria	Epsilonproteobacteria	Campylobacterales	Campylobacteraceae	Campylobacter	1	Rel[HS]
Campylobacter_jejuni	197	Bacteria	Proteobacteria	Epsilonproteobacteria	Campylobacterales	Campylobacteraceae	Campylobacter	1	Rel[HS]
Campylobacter_jejuni_81-176	194	Bacteria	Proteobacteria	Epsilonproteobacteria	Campylobacterales	Campylobacteraceae	Campylobacter	1	Rel[HS]
Campylobacter_jejuni_81116	194	Bacteria	Proteobacteria	Epsilonproteobacteria	Campylobacterales	Campylobacteraceae	Campylobacter	1	Rel[HS]
Campylobacter_jejuni_doylei_269_97	194	Bacteria	Proteobacteria	Epsilonproteobacteria	Campylobacterales	Campylobacteraceae	Campylobacter	1	Rel[HS]
Campylobacter_jejuni_RM1221	195099	Bacteria	Proteobacteria	Epsilonproteobacteria	Campylobacterales	Campylobacteraceae	Campylobacter	1	Rel[HS]
Campylobacter_lari_RM2100	306263	Bacteria	Proteobacteria	Epsilonproteobacteria	Campylobacterales	Campylobacteraceae	Campylobacter	1	Rel[HS]
Helicobacter_acinonychis_Sheeba	382638	Bacteria	Proteobacteria	Epsilonproteobacteria	Campylobacterales	Helicobacteraceae	Helicobacter	1	Rel[HS]
Helicobacter_hepaticus	32025	Bacteria	Proteobacteria	Epsilonproteobacteria	Campylobacterales	Helicobacteraceae	Helicobacter	1	Rel[HS]
Helicobacter_pylori_26695	85962	Bacteria	Proteobacteria	Epsilonproteobacteria	Campylobacterales	Helicobacteraceae	Helicobacter	1	Rel[HS]
Helicobacter_pylori_B38	592205	Bacteria	Proteobacteria	Epsilonproteobacteria	Campylobacterales	Helicobacteraceae	Helicobacter	1	Rel[HS]
Helicobacter_pylori_G27	563041	Bacteria	Proteobacteria	Epsilonproteobacteria	Campylobacterales	Helicobacteraceae	Helicobacter	1	Rel[HS]
Helicobacter_pylori_HPAG1	357544	Bacteria	Proteobacteria	Epsilonproteobacteria	Campylobacterales	Helicobacteraceae	Helicobacter	1	Rel[HS]
Helicobacter_pylori_J99	85963	Bacteria	Proteobacteria	Epsilonproteobacteria	Campylobacterales	Helicobacteraceae	Helicobacter	1	Rel[HS]
Helicobacter_pylori_P12	570508	Bacteria	Proteobacteria	Epsilonproteobacteria	Campylobacterales	Helicobacteraceae	Helicobacter	1	Rel[HS]
Helicobacter_pylori_Shi470	512562	Bacteria	Proteobacteria	Epsilonproteobacteria	Campylobacterales	Helicobacteraceae	Helicobacter	1	Rel[HS]
Thiomicrospira_denitrificans_ATCC_33889	326298	Bacteria	Proteobacteria	Epsilonproteobacteria	Campylobacterales	Helicobacteraceae	Sulfurimonas	1	Rel[HS]
Wolinella_succinogenes	844	Bacteria	Proteobacteria	Epsilonproteobacteria	Campylobacterales	Helicobacteraceae	Wolinella	1	Rel[HS]
Nautilia_profundicola_AmH	598659	Bacteria	Proteobacteria	Epsilonproteobacteria	Nautiliales	Nautiliaceae	Nautilia	1	Rel[HS]
Nitratiruptor_SB155-2	269258	Bacteria	Proteobacteria	Epsilonproteobacteria	no info	no info	Nitratiruptor	1	Rel[HS]
Sulfurovum_NBC37-1	265570	Bacteria	Proteobacteria	Epsilonproteobacteria	no info	no info	Sulfurovum	2	divRel[S], Rel[HS]
Acidithiobacillus_ferrooxidans_ATCC_23270	243159	Bacteria	Proteobacteria	Gammaproteobacteria	Acidithiobacillales	Acidithiobacillaceae	Acidithiobacillus	1	SpoT[HS]
Acidithiobacillus_ferrooxidans_ATCC_53993	380394	Bacteria	Proteobacteria	Gammaproteobacteria	Acidithiobacillales	Acidithiobacillaceae	Acidithiobacillus	1	SpoT[HS]
Aeromonas_hydrophila_ATCC_7966	642	Bacteria	Proteobacteria	Gammaproteobacteria	Aeromonadales	Aeromonadaceae	Aeromonas	3	bdRel[S], RelA[hS], SpoT[HS]
Aeromonas_salmonicida_A449	642	Bacteria	Proteobacteria	Gammaproteobacteria	Aeromonadales	Aeromonadaceae	Aeromonas	2	RelA[hS], SpoT[HS]
Tolumonas_auensis_DSM_9187	595494	Bacteria	Proteobacteria	Gammaproteobacteria	Aeromonadales	Aeromonadaceae	Tolumonas	2	RelA[hS], SpoT[HS]
Alteromonas_macleodii__Deep_ecotype_	314275	Bacteria	Proteobacteria	Gammaproteobacteria	Alteromonadales	Alteromonadaceae	Alteromonas	3	gRel[S], RelA[hS], SpoT[HS]
Marinobacter_aquaeolei_VT8	351348	Bacteria	Proteobacteria	Gammaproteobacteria	Alteromonadales	Alteromonadaceae	Marinobacter	2	RelA[hS], SpoT[HS]
Saccharophagus_degradans_2-40	203122	Bacteria	Proteobacteria	Gammaproteobacteria	Alteromonadales	Alteromonadaceae	Saccharophagus	3	pbcSpo[H], RelA[hS], SpoT[HS]
Colwellia_psychrerythraea_34H	167879	Bacteria	Proteobacteria	Gammaproteobacteria	Alteromonadales	Colwelliaceae	Colwellia	2	RelA[hS], SpoT[HS]
Idiomarina_loihiensis_L2TR	283942	Bacteria	Proteobacteria	Gammaproteobacteria	Alteromonadales	Idiomarinaceae	Idiomarina	3	fpRel[S], RelA[hS], SpoT[HS]
Teredinibacter_turnerae_T7901	377629	Bacteria	Proteobacteria	Gammaproteobacteria	Alteromonadales	no info	Teredinibacter	2	RelA[hS], SpoT[HS]
Pseudoalteromonas_atlantica_T6c	342610	Bacteria	Proteobacteria	Gammaproteobacteria	Alteromonadales	Pseudoalteromonadaceae	Pseudoalteromonas	3	paSpo[H], RelA[hS], SpoT[HS]
Pseudoalteromonas_haloplanktis_TAC125	326442	Bacteria	Proteobacteria	Gammaproteobacteria	Alteromonadales	Pseudoalteromonadaceae	Pseudoalteromonas	2	RelA[hS], SpoT[HS]
Psychromonas_ingrahamii_37	357804	Bacteria	Proteobacteria	Gammaproteobacteria	Alteromonadales	Psychromonadaceae	Psychromonas	3	RelV[S], RelA[hS], SpoT[HS]
Shewanella_amazonensis_SB2B	326297	Bacteria	Proteobacteria	Gammaproteobacteria	Alteromonadales	Shewanellaceae	Shewanella	2	RelA[hS], SpoT[HS]
Shewanella_ANA-3	22	Bacteria	Proteobacteria	Gammaproteobacteria	Alteromonadales	Shewanellaceae	Shewanella	3	RelV[S], RelA[hS], SpoT[HS]
Shewanella_baltica_OS155	325240	Bacteria	Proteobacteria	Gammaproteobacteria	Alteromonadales	Shewanellaceae	Shewanella	3	RelV[S], RelA[hS], SpoT[HS]
Shewanella_baltica_OS185	402882	Bacteria	Proteobacteria	Gammaproteobacteria	Alteromonadales	Shewanellaceae	Shewanella	3	RelV[S], RelA[hS], SpoT[HS]
Shewanella_baltica_OS195	399599	Bacteria	Proteobacteria	Gammaproteobacteria	Alteromonadales	Shewanellaceae	Shewanella	3	RelV[S], RelA[hS], SpoT[HS]
Shewanella_baltica_OS223	407976	Bacteria	Proteobacteria	Gammaproteobacteria	Alteromonadales	Shewanellaceae	Shewanella	3	RelV[S], RelA[hS], SpoT[HS]
Shewanella_denitrificans_OS217	318161	Bacteria	Proteobacteria	Gammaproteobacteria	Alteromonadales	Shewanellaceae	Shewanella	2	RelA[hS], SpoT[HS]
Shewanella_frigidimarina_NCIMB_400	318167	Bacteria	Proteobacteria	Gammaproteobacteria	Alteromonadales	Shewanellaceae	Shewanella	3	RelV[S], RelA[hS], SpoT[HS]
Shewanella_halifaxensis_HAW_EB4	458817	Bacteria	Proteobacteria	Gammaproteobacteria	Alteromonadales	Shewanellaceae	Shewanella	3	RelV[S], RelA[hS], SpoT[HS]
Shewanella_loihica_PV-4	323850	Bacteria	Proteobacteria	Gammaproteobacteria	Alteromonadales	Shewanellaceae	Shewanella	3	RelV[S], RelA[hS], SpoT[HS]
Shewanella_MR-4	22	Bacteria	Proteobacteria	Gammaproteobacteria	Alteromonadales	Shewanellaceae	Shewanella	3	RelV[S], RelA[hS], SpoT[HS]
Shewanella_MR-7	22	Bacteria	Proteobacteria	Gammaproteobacteria	Alteromonadales	Shewanellaceae	Shewanella	3	RelV[S], RelA[hS], SpoT[HS]
Shewanella_oneidensis	70863	Bacteria	Proteobacteria	Gammaproteobacteria	Alteromonadales	Shewanellaceae	Shewanella	3	RelV[S], RelA[hS], SpoT[HS]
Shewanella_pealeana_ATCC_700345	398579	Bacteria	Proteobacteria	Gammaproteobacteria	Alteromonadales	Shewanellaceae	Shewanella	3	RelV[S], RelA[hS], SpoT[HS]
Shewanella_piezotolerans_WP3	225849	Bacteria	Proteobacteria	Gammaproteobacteria	Alteromonadales	Shewanellaceae	Shewanella	3	RelV[S], RelA[hS], SpoT[HS]
Shewanella_putrefaciens_CN-32	319224	Bacteria	Proteobacteria	Gammaproteobacteria	Alteromonadales	Shewanellaceae	Shewanella	3	RelV[S], RelA[hS], SpoT[HS]
Shewanella_sediminis_HAW-EB3	425104	Bacteria	Proteobacteria	Gammaproteobacteria	Alteromonadales	Shewanellaceae	Shewanella	4	RelV[S], paSpo[H], RelA[hS], SpoT[HS]
Shewanella_W3-18-1	22	Bacteria	Proteobacteria	Gammaproteobacteria	Alteromonadales	Shewanellaceae	Shewanella	3	RelV[S], RelA[hS], SpoT[HS]
Shewanella_woodyi_ATCC_51908	392500	Bacteria	Proteobacteria	Gammaproteobacteria	Alteromonadales	Shewanellaceae	Shewanella	3	RelV[S], RelA[hS], SpoT[HS]
Dichelobacter_nodosus_VCS1703A	246195	Bacteria	Proteobacteria	Gammaproteobacteria	Cardiobacteriales	Cardiobacteriaceae	Dichelobacter	2	RelA[hS], SpoT[HS]
Nitrosococcus_oceani_ATCC_19707	323261	Bacteria	Proteobacteria	Gammaproteobacteria	Chromatiales	Chromatiaceae	Nitrosococcus	2	RelA[hS], SpoT[HS]
Alkalilimnicola_ehrlichei_MLHE-1	187272	Bacteria	Proteobacteria	Gammaproteobacteria	Chromatiales	Ectothiorhodospiraceae	Alkalilimnicola	2	RelA[hS], SpoT[HS]
Halorhodospira_halophila_SL1	349124	Bacteria	Proteobacteria	Gammaproteobacteria	Chromatiales	Ectothiorhodospiraceae	Halorhodospira	3	paSpo[H], RelA[hS], SpoT[HS]
Thioalkalivibrio_HL_EbGR7	106633	Bacteria	Proteobacteria	Gammaproteobacteria	Chromatiales	Ectothiorhodospiraceae	Thioalkalivibrio	2	RelA[hS], SpoT[HS]
Halothiobacillus_neapolitanus_c2	555778	Bacteria	Proteobacteria	Gammaproteobacteria	Chromatiales	Halothiobacillaceae	Halothiobacillus	2	RelA[hS], SpoT[HS]
Buchnera_aphidicola	9	Bacteria	Proteobacteria	Gammaproteobacteria	Enterobacteriales	Enterobacteriaceae	Buchnera	0
Buchnera_aphidicola_5A__Acyrthosiphon_pisum_	563178	Bacteria	Proteobacteria	Gammaproteobacteria	Enterobacteriales	Enterobacteriaceae	Buchnera	0
Buchnera_aphidicola_Cc_Cinara_cedri	372461	Bacteria	Proteobacteria	Gammaproteobacteria	Enterobacteriales	Enterobacteriaceae	Buchnera	0
Buchnera_aphidicola_Sg	198804	Bacteria	Proteobacteria	Gammaproteobacteria	Enterobacteriales	Enterobacteriaceae	Buchnera	0
Buchnera_aphidicola_Tuc7__Acyrthosiphon_pisum_	561501	Bacteria	Proteobacteria	Gammaproteobacteria	Enterobacteriales	Enterobacteriaceae	Buchnera	0
Buchnera_sp	64684	Bacteria	Proteobacteria	Gammaproteobacteria	Enterobacteriales	Enterobacteriaceae	Buchnera	0
Candidatus_Blochmannia_floridanus	203907	Bacteria	Proteobacteria	Gammaproteobacteria	Enterobacteriales	Enterobacteriaceae	Candidatus Blochmannia	0
Candidatus_Blochmannia_pennsylvanicus_BPEN	291272	Bacteria	Proteobacteria	Gammaproteobacteria	Enterobacteriales	Enterobacteriaceae	Candidatus Blochmannia	0
Candidatus_Hamiltonella_defensa_5AT__Acyrthosiphon_pisum_	572265	Bacteria	Proteobacteria	Gammaproteobacteria	Enterobacteriales	Enterobacteriaceae	Candidatus Hamiltonella	2	RelA[hS], SpoT[HS]
Citrobacter_koseri_ATCC_BAA-895	290338	Bacteria	Proteobacteria	Gammaproteobacteria	Enterobacteriales	Enterobacteriaceae	Citrobacter	2	RelA[hS], SpoT[HS]
Cronobacter_turicensis	413502	Bacteria	Proteobacteria	Gammaproteobacteria	Enterobacteriales	Enterobacteriaceae	Cronobacter	2	RelA[hS], SpoT[HS]
Dickeya_dadantii_Ech703	579405	Bacteria	Proteobacteria	Gammaproteobacteria	Enterobacteriales	Enterobacteriaceae	Dickeya	3	paSpo[H], RelA[hS], SpoT[HS]
Dickeya_zeae_Ech1591	561229	Bacteria	Proteobacteria	Gammaproteobacteria	Enterobacteriales	Enterobacteriaceae	Dickeya	3	paSpo[H], RelA[hS], SpoT[HS]
Edwardsiella_ictaluri_93_146	634503	Bacteria	Proteobacteria	Gammaproteobacteria	Enterobacteriales	Enterobacteriaceae	Edwardsiella	3	fpRel[S], RelA[hS], SpoT[HS]
Enterobacter_638	547	Bacteria	Proteobacteria	Gammaproteobacteria	Enterobacteriales	Enterobacteriaceae	Enterobacter	2	RelA[hS], SpoT[HS]
Enterobacter_sakazakii_ATCC_BAA-894	290339	Bacteria	Proteobacteria	Gammaproteobacteria	Enterobacteriales	Enterobacteriaceae	Cronobacter	2	RelA[hS], SpoT[HS]
Erwinia_carotovora_atroseptica_SCRI1043	551	Bacteria	Proteobacteria	Gammaproteobacteria	Enterobacteriales	Enterobacteriaceae	Erwinia	2	RelA[hS], SpoT[HS]
Erwinia_pyrifoliae_Ep1_96	551	Bacteria	Proteobacteria	Gammaproteobacteria	Enterobacteriales	Enterobacteriaceae	Erwinia	3	paSpo[H], RelA[hS], SpoT[HS]
Erwinia_tasmaniensis	338565	Bacteria	Proteobacteria	Gammaproteobacteria	Enterobacteriales	Enterobacteriaceae	Erwinia	3	paSpo[H], RelA[hS], SpoT[HS]
Escherichia_coli_0127_H6_E2348_69	561	Bacteria	Proteobacteria	Gammaproteobacteria	Enterobacteriales	Enterobacteriaceae	Escherichia	2	RelA[hS], SpoT[HS]
Escherichia_coli_536	362663	Bacteria	Proteobacteria	Gammaproteobacteria	Enterobacteriales	Enterobacteriaceae	Escherichia	2	RelA[hS], SpoT[HS]
Escherichia_coli_55989	585055	Bacteria	Proteobacteria	Gammaproteobacteria	Enterobacteriales	Enterobacteriaceae	Escherichia	2	RelA[hS], SpoT[HS]
Escherichia_coli_APEC_O1	405955	Bacteria	Proteobacteria	Gammaproteobacteria	Enterobacteriales	Enterobacteriaceae	Escherichia	2	RelA[hS], SpoT[HS]
Escherichia_coli_BL21_DE3_	469008	Bacteria	Proteobacteria	Gammaproteobacteria	Enterobacteriales	Enterobacteriaceae	Escherichia	2	RelA[hS], SpoT[HS]
Escherichia_coli_BW2952	595496	Bacteria	Proteobacteria	Gammaproteobacteria	Enterobacteriales	Enterobacteriaceae	Escherichia	2	RelA[hS], SpoT[HS]
Escherichia_coli_B_REL606	561	Bacteria	Proteobacteria	Gammaproteobacteria	Enterobacteriales	Enterobacteriaceae	Escherichia	2	RelA[hS], SpoT[HS]
Escherichia_coli_CFT073	199310	Bacteria	Proteobacteria	Gammaproteobacteria	Enterobacteriales	Enterobacteriaceae	Escherichia	2	RelA[hS], SpoT[HS]
Escherichia_coli_C_ATCC_8739	481805	Bacteria	Proteobacteria	Gammaproteobacteria	Enterobacteriales	Enterobacteriaceae	Escherichia	2	RelA[hS], SpoT[HS]
Escherichia_coli_E24377A	331111	Bacteria	Proteobacteria	Gammaproteobacteria	Enterobacteriales	Enterobacteriaceae	Escherichia	2	RelA[hS], SpoT[HS]
Escherichia_coli_ED1a	585397	Bacteria	Proteobacteria	Gammaproteobacteria	Enterobacteriales	Enterobacteriaceae	Escherichia	2	RelA[hS], SpoT[HS]
Escherichia_coli_HS	331112	Bacteria	Proteobacteria	Gammaproteobacteria	Enterobacteriales	Enterobacteriaceae	Escherichia	2	RelA[hS], SpoT[HS]
Escherichia_coli_IAI1	585034	Bacteria	Proteobacteria	Gammaproteobacteria	Enterobacteriales	Enterobacteriaceae	Escherichia	2	RelA[hS], SpoT[HS]
Escherichia_coli_IAI39	585057	Bacteria	Proteobacteria	Gammaproteobacteria	Enterobacteriales	Enterobacteriaceae	Escherichia	2	RelA[hS], SpoT[HS]
Escherichia_coli_K_12_substr__DH10B	561	Bacteria	Proteobacteria	Gammaproteobacteria	Enterobacteriales	Enterobacteriaceae	Escherichia	1	SpoT[HS],*
Escherichia_coli_K_12_substr__MG1655	561	Bacteria	Proteobacteria	Gammaproteobacteria	Enterobacteriales	Enterobacteriaceae	Escherichia	2	RelA[hS], SpoT[HS]
Escherichia_coli_K_12_substr__W3110	561	Bacteria	Proteobacteria	Gammaproteobacteria	Enterobacteriales	Enterobacteriaceae	Escherichia	2	RelA[hS], SpoT[HS]
Escherichia_coli_O103_H2_12009	561	Bacteria	Proteobacteria	Gammaproteobacteria	Enterobacteriales	Enterobacteriaceae	Escherichia	2	RelA[hS], SpoT[HS]
Escherichia_coli_O111_H__11128	561	Bacteria	Proteobacteria	Gammaproteobacteria	Enterobacteriales	Enterobacteriaceae	Escherichia	2	RelA[hS], SpoT[HS]
Escherichia_coli_O157H7	561	Bacteria	Proteobacteria	Gammaproteobacteria	Enterobacteriales	Enterobacteriaceae	Escherichia	2	RelA[hS], SpoT[HS]
Escherichia_coli_O157H7_EDL933	561	Bacteria	Proteobacteria	Gammaproteobacteria	Enterobacteriales	Enterobacteriaceae	Escherichia	2	RelA[hS], SpoT[HS]
Escherichia_coli_O157_H7_EC4115	561	Bacteria	Proteobacteria	Gammaproteobacteria	Enterobacteriales	Enterobacteriaceae	Escherichia	2	RelA[hS], SpoT[HS]
Escherichia_coli_O157_H7_TW14359	561	Bacteria	Proteobacteria	Gammaproteobacteria	Enterobacteriales	Enterobacteriaceae	Escherichia	2	RelA[hS], SpoT[HS]
Escherichia_coli_O26_H11_11368	573235	Bacteria	Proteobacteria	Gammaproteobacteria	Enterobacteriales	Enterobacteriaceae	Escherichia	2	RelA[hS], SpoT[HS]
Escherichia_coli_S88	585035	Bacteria	Proteobacteria	Gammaproteobacteria	Enterobacteriales	Enterobacteriaceae	Escherichia	3	divRel[S], RelA[hS], SpoT[HS]
Escherichia_coli_SE11	409438	Bacteria	Proteobacteria	Gammaproteobacteria	Enterobacteriales	Enterobacteriaceae	Escherichia	2	RelA[hS], SpoT[HS]
Escherichia_coli_SMS_3_5	439855	Bacteria	Proteobacteria	Gammaproteobacteria	Enterobacteriales	Enterobacteriaceae	Escherichia	2	RelA[hS], SpoT[HS]
Escherichia_coli_UMN026	585056	Bacteria	Proteobacteria	Gammaproteobacteria	Enterobacteriales	Enterobacteriaceae	Escherichia	2	RelA[hS], SpoT[HS]
Escherichia_coli_UTI89	364106	Bacteria	Proteobacteria	Gammaproteobacteria	Enterobacteriales	Enterobacteriaceae	Escherichia	2	RelA[hS], SpoT[HS]
Escherichia_fergusonii_ATCC_35469	585054	Bacteria	Proteobacteria	Gammaproteobacteria	Enterobacteriales	Enterobacteriaceae	Escherichia	2	RelA[hS], SpoT[HS]
Klebsiella_pneumoniae_342	507522	Bacteria	Proteobacteria	Gammaproteobacteria	Enterobacteriales	Enterobacteriaceae	Klebsiella	2	RelA[hS], SpoT[HS]
Klebsiella_pneumoniae_MGH_78578	570	Bacteria	Proteobacteria	Gammaproteobacteria	Enterobacteriales	Enterobacteriaceae	Klebsiella	2	RelA[hS], SpoT[HS]
Klebsiella_pneumoniae_NTUH_K2044	484021	Bacteria	Proteobacteria	Gammaproteobacteria	Enterobacteriales	Enterobacteriaceae	Klebsiella	2	RelA[hS], SpoT[HS]
Pectobacterium_carotovorum_PC1	122277	Bacteria	Proteobacteria	Gammaproteobacteria	Enterobacteriales	Enterobacteriaceae	Pectobacterium	2	RelA[hS], SpoT[HS]
Pectobacterium_wasabiae_WPP163	561231	Bacteria	Proteobacteria	Gammaproteobacteria	Enterobacteriales	Enterobacteriaceae	Pectobacterium	3	gRel[S], RelA[hS], SpoT[HS]
Photorhabdus_asymbiotica	291112	Bacteria	Proteobacteria	Gammaproteobacteria	Enterobacteriales	Enterobacteriaceae	Photorhabdus	2	RelA[hS], SpoT[HS]
Photorhabdus_luminescens	29488	Bacteria	Proteobacteria	Gammaproteobacteria	Enterobacteriales	Enterobacteriaceae	Photorhabdus	2	RelA[hS], SpoT[HS]
Proteus_mirabilis	584	Bacteria	Proteobacteria	Gammaproteobacteria	Enterobacteriales	Enterobacteriaceae	Proteus	2	RelA[hS], SpoT[HS]
Salmonella_enterica_arizonae_serovar_62_z4_z23__	590	Bacteria	Proteobacteria	Gammaproteobacteria	Enterobacteriales	Enterobacteriaceae	Salmonella	2	RelA[hS], SpoT[HS]
Salmonella_enterica_Choleraesuis	590	Bacteria	Proteobacteria	Gammaproteobacteria	Enterobacteriales	Enterobacteriaceae	Salmonella	2	RelA[hS], SpoT[HS]
Salmonella_enterica_Paratypi_ATCC_9150	590	Bacteria	Proteobacteria	Gammaproteobacteria	Enterobacteriales	Enterobacteriaceae	Salmonella	2	RelA[hS], SpoT[HS]
Salmonella_enterica_serovar_Agona_SL483	590	Bacteria	Proteobacteria	Gammaproteobacteria	Enterobacteriales	Enterobacteriaceae	Salmonella	3	gRel[S], RelA[hS], SpoT[HS]
Salmonella_enterica_serovar_Dublin_CT_02021853	590	Bacteria	Proteobacteria	Gammaproteobacteria	Enterobacteriales	Enterobacteriaceae	Salmonella	2	RelA[hS], SpoT[HS]
Salmonella_enterica_serovar_Enteritidis_P125109	590	Bacteria	Proteobacteria	Gammaproteobacteria	Enterobacteriales	Enterobacteriaceae	Salmonella	2	RelA[hS], SpoT[HS]
Salmonella_enterica_serovar_Gallinarum_287_91	590	Bacteria	Proteobacteria	Gammaproteobacteria	Enterobacteriales	Enterobacteriaceae	Salmonella	2	RelA[hS], SpoT[HS]
Salmonella_enterica_serovar_Heidelberg_SL476	590	Bacteria	Proteobacteria	Gammaproteobacteria	Enterobacteriales	Enterobacteriaceae	Salmonella	2	RelA[hS], SpoT[HS]
Salmonella_enterica_serovar_Newport_SL254	590	Bacteria	Proteobacteria	Gammaproteobacteria	Enterobacteriales	Enterobacteriaceae	Salmonella	2	RelA[hS], SpoT[HS]
Salmonella_enterica_serovar_Paratyphi_A_AKU_12601	590	Bacteria	Proteobacteria	Gammaproteobacteria	Enterobacteriales	Enterobacteriaceae	Salmonella	2	RelA[hS], SpoT[HS]
Salmonella_enterica_serovar_Paratyphi_B_SPB7	590	Bacteria	Proteobacteria	Gammaproteobacteria	Enterobacteriales	Enterobacteriaceae	Salmonella	2	RelA[hS], SpoT[HS]
Salmonella_enterica_serovar_Paratyphi_C_RKS4594	590	Bacteria	Proteobacteria	Gammaproteobacteria	Enterobacteriales	Enterobacteriaceae	Salmonella	2	RelA[hS], SpoT[HS]
Salmonella_enterica_serovar_Schwarzengrund_CVM19633	590	Bacteria	Proteobacteria	Gammaproteobacteria	Enterobacteriales	Enterobacteriaceae	Salmonella	2	RelA[hS], SpoT[HS]
Salmonella_enterica_serovar_Typhi_Ty2	590	Bacteria	Proteobacteria	Gammaproteobacteria	Enterobacteriales	Enterobacteriaceae	Salmonella	2	RelA[hS], SpoT[HS]
Salmonella_typhi	90370	Bacteria	Proteobacteria	Gammaproteobacteria	Enterobacteriales	Enterobacteriaceae	Salmonella	3	paSpo[H], RelA[hS], SpoT[HS]
Salmonella_typhimurium_LT2	99287	Bacteria	Proteobacteria	Gammaproteobacteria	Enterobacteriales	Enterobacteriaceae	Salmonella	2	RelA[hS], SpoT[HS]
Serratia_proteamaculans_568	399741	Bacteria	Proteobacteria	Gammaproteobacteria	Enterobacteriales	Enterobacteriaceae	Serratia	3	paSpo[H], RelA[hS], SpoT[HS]
Shigella_boydii_CDC_3083_94	344609	Bacteria	Proteobacteria	Gammaproteobacteria	Enterobacteriales	Enterobacteriaceae	Shigella	2	RelA[hS], SpoT[HS]
Shigella_boydii_Sb227	300268	Bacteria	Proteobacteria	Gammaproteobacteria	Enterobacteriales	Enterobacteriaceae	Shigella	2	RelA[hS], SpoT[HS]
Shigella_dysenteriae	622	Bacteria	Proteobacteria	Gammaproteobacteria	Enterobacteriales	Enterobacteriaceae	Shigella	2	RelA[hS], SpoT[HS]
Shigella_flexneri_2a	42897	Bacteria	Proteobacteria	Gammaproteobacteria	Enterobacteriales	Enterobacteriaceae	Shigella	2	RelA[hS], SpoT[HS]
Shigella_flexneri_2a_2457T	620	Bacteria	Proteobacteria	Gammaproteobacteria	Enterobacteriales	Enterobacteriaceae	Shigella	2	RelA[hS], SpoT[HS]
Shigella_flexneri_5_8401	620	Bacteria	Proteobacteria	Gammaproteobacteria	Enterobacteriales	Enterobacteriaceae	Shigella	2	RelA[hS], SpoT[HS]
Shigella_sonnei_Ss046	300269	Bacteria	Proteobacteria	Gammaproteobacteria	Enterobacteriales	Enterobacteriaceae	Shigella	2	RelA[hS], SpoT[HS]
Sodalis_glossinidius_morsitans	343509	Bacteria	Proteobacteria	Gammaproteobacteria	Enterobacteriales	Enterobacteriaceae	Sodalis	3	RelA[hS], capRel[S], SpoT[HS]
Wigglesworthia_brevipalpis	36870	Bacteria	Proteobacteria	Gammaproteobacteria	Enterobacteriales	Enterobacteriaceae	Wigglesworthia	0
Yersinia_enterocolitica_8081	629	Bacteria	Proteobacteria	Gammaproteobacteria	Enterobacteriales	Enterobacteriaceae	Yersinia	3	gRel[S], RelA[hS], SpoT[HS]
Yersinia_pestis_Angola	349746	Bacteria	Proteobacteria	Gammaproteobacteria	Enterobacteriales	Enterobacteriaceae	Yersinia	2	RelA[hS], SpoT[HS]
Yersinia_pestis_Antiqua	360102	Bacteria	Proteobacteria	Gammaproteobacteria	Enterobacteriales	Enterobacteriaceae	Yersinia	2	RelA[hS], SpoT[HS]
Yersinia_pestis_biovar_Microtus_91001	229193	Bacteria	Proteobacteria	Gammaproteobacteria	Enterobacteriales	Enterobacteriaceae	Yersinia	2	RelA[hS], SpoT[HS]
Yersinia_pestis_CO92	214092	Bacteria	Proteobacteria	Gammaproteobacteria	Enterobacteriales	Enterobacteriaceae	Yersinia	2	RelA[hS], SpoT[HS]
Yersinia_pestis_KIM_10	187410	Bacteria	Proteobacteria	Gammaproteobacteria	Enterobacteriales	Enterobacteriaceae	Yersinia	2	RelA[hS], SpoT[HS]
Yersinia_pestis_Nepal516	377628	Bacteria	Proteobacteria	Gammaproteobacteria	Enterobacteriales	Enterobacteriaceae	Yersinia	2	RelA[hS], SpoT[HS]
Yersinia_pestis_Pestoides_F	386656	Bacteria	Proteobacteria	Gammaproteobacteria	Enterobacteriales	Enterobacteriaceae	Yersinia	2	RelA[hS], SpoT[HS]
Yersinia_pseudotuberculosis_IP32953	273123	Bacteria	Proteobacteria	Gammaproteobacteria	Enterobacteriales	Enterobacteriaceae	Yersinia	2	RelA[hS], SpoT[HS]
Yersinia_pseudotuberculosis_IP_31758	349747	Bacteria	Proteobacteria	Gammaproteobacteria	Enterobacteriales	Enterobacteriaceae	Yersinia	2	RelA[hS], SpoT[HS]
Yersinia_pseudotuberculosis_PB1_	629	Bacteria	Proteobacteria	Gammaproteobacteria	Enterobacteriales	Enterobacteriaceae	Yersinia	2	RelA[hS], SpoT[HS]
Yersinia_pseudotuberculosis_YPIII	502800	Bacteria	Proteobacteria	Gammaproteobacteria	Enterobacteriales	Enterobacteriaceae	Yersinia	2	RelA[hS], SpoT[HS]
Coxiella_burnetii	777	Bacteria	Proteobacteria	Gammaproteobacteria	Legionellales	Coxiellaceae	Coxiella	2	RelA[hS], SpoT[HS]
Coxiella_burnetii_CbuG_Q212	434923	Bacteria	Proteobacteria	Gammaproteobacteria	Legionellales	Coxiellaceae	Coxiella	2	RelA[hS], SpoT[HS]
Coxiella_burnetii_CbuK_Q154	434924	Bacteria	Proteobacteria	Gammaproteobacteria	Legionellales	Coxiellaceae	Coxiella	2	RelA[hS], SpoT[HS]
Coxiella_burnetii_Dugway_7E9-12	434922	Bacteria	Proteobacteria	Gammaproteobacteria	Legionellales	Coxiellaceae	Coxiella	2	RelA[hS], SpoT[HS]
Coxiella_burnetii_RSA_331	360115	Bacteria	Proteobacteria	Gammaproteobacteria	Legionellales	Coxiellaceae	Coxiella	2	RelA[hS], SpoT[HS]
Legionella_pneumophila_Corby	400673	Bacteria	Proteobacteria	Gammaproteobacteria	Legionellales	Legionellaceae	Legionella	2	RelA[hS], SpoT[HS]
Legionella_pneumophila_Lens	297245	Bacteria	Proteobacteria	Gammaproteobacteria	Legionellales	Legionellaceae	Legionella	2	RelA[hS], SpoT[HS]
Legionella_pneumophila_Paris	297246	Bacteria	Proteobacteria	Gammaproteobacteria	Legionellales	Legionellaceae	Legionella	2	RelA[hS], SpoT[HS]
Legionella_pneumophila_Philadelphia_1	445	Bacteria	Proteobacteria	Gammaproteobacteria	Legionellales	Legionellaceae	Legionella	2	RelA[hS], SpoT[HS]
Methylococcus_capsulatus_Bath	243233	Bacteria	Proteobacteria	Gammaproteobacteria	Methylococcales	Methylococcaceae	Methylococcus	2	RelA[hS], SpoT[HS]
Baumannia_cicadellinicola_Homalodisca_coagulata	198346	Bacteria	Proteobacteria	Gammaproteobacteria	no info	no info	Baumannia	0
Candidatus_Carsonella_ruddii_PV	387662	Bacteria	Proteobacteria	Gammaproteobacteria	no info	no info	Candidatus Carsonella	0
Candidatus_Ruthia_magnifica_Cm_Calyptogena_magnifica_	413404	Bacteria	Proteobacteria	Gammaproteobacteria	no info	no info	Candidatus Ruthia magnifica	1	SpoT[HS]
Candidatus_Vesicomyosocius_okutanii_HA	412965	Bacteria	Proteobacteria	Gammaproteobacteria	no info	no info	Candidatus Vesicomyosocius	1	SpoT[HS]
Kangiella_koreensis_DSM_16069	523791	Bacteria	Proteobacteria	Gammaproteobacteria	no info	no info	Kangiella	2	RelA[hS], SpoT[HS]
Alcanivorax_borkumensis_SK2	393595	Bacteria	Proteobacteria	Gammaproteobacteria	Oceanospirillales	Alcanivoracaceae	Alcanivorax	2	RelA[hS], SpoT[HS]
Hahella_chejuensis_KCTC_2396	349521	Bacteria	Proteobacteria	Gammaproteobacteria	Oceanospirillales	Hahellaceae	Hahella	3	paSpo[H], RelA[hS], SpoT[HS]
Chromohalobacter_salexigens_DSM_3043	290398	Bacteria	Proteobacteria	Gammaproteobacteria	Oceanospirillales	Halomonadaceae	Chromohalobacter	2	RelA[hS], SpoT[HS]
Marinomonas_MWYL1	28253	Bacteria	Proteobacteria	Gammaproteobacteria	Oceanospirillales	Oceanospirillaceae	Marinomonas	2	RelA[hS], SpoT[HS]
Actinobacillus_pleuropneumoniae_L20	416269	Bacteria	Proteobacteria	Gammaproteobacteria	Pasteurellales	Pasteurellaceae	Actinobacillus	3	fpRel2[S], RelA[hS], SpoT[HS]†
Actinobacillus_pleuropneumoniae_serovar_3_JL03	713	Bacteria	Proteobacteria	Gammaproteobacteria	Pasteurellales	Pasteurellaceae	Actinobacillus	1	SpoT[HS]†, *(RelA[hS])
Actinobacillus_pleuropneumoniae_serovar_7_AP76	713	Bacteria	Proteobacteria	Gammaproteobacteria	Pasteurellales	Pasteurellaceae	Actinobacillus	2	RelA[hS], SpoT[HS]†
Actinobacillus_succinogenes_130Z	339671	Bacteria	Proteobacteria	Gammaproteobacteria	Pasteurellales	Pasteurellaceae	Actinobacillus	3	fpRel2[S], RelA[hS], SpoT[HS]
Aggregatibacter_actinomycetemcomitans_D11S_1	668336	Bacteria	Proteobacteria	Gammaproteobacteria	Pasteurellales	Pasteurellaceae	Aggregatibacter	3	gRel[S], RelA[hS], SpoT[HS]
Aggregatibacter_aphrophilus_NJ8700	634176	Bacteria	Proteobacteria	Gammaproteobacteria	Pasteurellales	Pasteurellaceae	Aggregatibacter	2	RelA[hS], SpoT[HS]
Haemophilus_ducreyi_35000HP	233412	Bacteria	Proteobacteria	Gammaproteobacteria	Pasteurellales	Pasteurellaceae	Haemophilus	2	RelA[hS], SpoT[HS]†
Haemophilus_influenzae	727	Bacteria	Proteobacteria	Gammaproteobacteria	Pasteurellales	Pasteurellaceae	Haemophilus	2	RelA[hS], SpoT[HS]
Haemophilus_influenzae_86_028NP	281310	Bacteria	Proteobacteria	Gammaproteobacteria	Pasteurellales	Pasteurellaceae	Haemophilus	2	RelA[hS], SpoT[HS]
Haemophilus_influenzae_PittEE	374930	Bacteria	Proteobacteria	Gammaproteobacteria	Pasteurellales	Pasteurellaceae	Haemophilus	2	RelA[hS], SpoT[HS]
Haemophilus_influenzae_PittGG	374931	Bacteria	Proteobacteria	Gammaproteobacteria	Pasteurellales	Pasteurellaceae	Haemophilus	2	RelA[hS], SpoT[HS]
Haemophilus_parasuis_SH0165	557723	Bacteria	Proteobacteria	Gammaproteobacteria	Pasteurellales	Pasteurellaceae	Haemophilus	2	RelA[hS], SpoT[HS]
Haemophilus_somnus_129PT	205914	Bacteria	Proteobacteria	Gammaproteobacteria	Pasteurellales	Pasteurellaceae	Histophilus	2	RelA[hS], SpoT[HS]
Haemophilus_somnus_2336	228400	Bacteria	Proteobacteria	Gammaproteobacteria	Pasteurellales	Pasteurellaceae	Histophilus	2	RelA[hS], SpoT[HS]
Mannheimia_succiniciproducens_MBEL55E	221988	Bacteria	Proteobacteria	Gammaproteobacteria	Pasteurellales	Pasteurellaceae	Basfia	2	RelA[hS], SpoT[HS]
Pasteurella_multocida	747	Bacteria	Proteobacteria	Gammaproteobacteria	Pasteurellales	Pasteurellaceae	Pasteurella	2	RelA[hS], SpoT[HS]
Acinetobacter_baumannii_AB0057	480119	Bacteria	Proteobacteria	Gammaproteobacteria	Pseudomonadales	Moraxellaceae	Acinetobacter	4	divSpo[H], RelA[hS], capRel[S], SpoT[Hs]
Acinetobacter_baumannii_AB307_0294	557600	Bacteria	Proteobacteria	Gammaproteobacteria	Pseudomonadales	Moraxellaceae	Acinetobacter	3	divSpo[H], RelA[hS], SpoT[Hs]
Acinetobacter_baumannii_ACICU	405416	Bacteria	Proteobacteria	Gammaproteobacteria	Pseudomonadales	Moraxellaceae	Acinetobacter	3	divSpo[H], RelA[hS], SpoT[Hs]
Acinetobacter_baumannii_ATCC_17978	400667	Bacteria	Proteobacteria	Gammaproteobacteria	Pseudomonadales	Moraxellaceae	Acinetobacter	2	RelA[hS], SpoT[Hs]
Acinetobacter_baumannii_AYE	509173	Bacteria	Proteobacteria	Gammaproteobacteria	Pseudomonadales	Moraxellaceae	Acinetobacter	3	divSpo[H], RelA[hS], SpoT[Hs]
Acinetobacter_baumannii_SDF	509170	Bacteria	Proteobacteria	Gammaproteobacteria	Pseudomonadales	Moraxellaceae	Acinetobacter	2	RelA[hS], SpoT[Hs]
Acinetobacter_sp_ADP1	62977	Bacteria	Proteobacteria	Gammaproteobacteria	Pseudomonadales	Moraxellaceae	Acinetobacter	3	pbcSpo[H], RelA[hS], SpoT[Hs]
Psychrobacter_arcticum_273-4	259536	Bacteria	Proteobacteria	Gammaproteobacteria	Pseudomonadales	Moraxellaceae	Psychrobacter	2	RelA[hS], SpoT[Hs]
Psychrobacter_cryohalolentis_K5	335284	Bacteria	Proteobacteria	Gammaproteobacteria	Pseudomonadales	Moraxellaceae	Psychrobacter	2	RelA[hS], SpoT[Hs]
Psychrobacter_PRwf-1	497	Bacteria	Proteobacteria	Gammaproteobacteria	Pseudomonadales	Moraxellaceae	Psychrobacter	2	RelA[hS], SpoT[H]
Azotobacter_vinelandii_DJ	322710	Bacteria	Proteobacteria	Gammaproteobacteria	Pseudomonadales	Pseudomonadaceae	Azotobacter	2	RelA[hS], SpoT[HS]
Cellvibrio_japonicus_Ueda107	498211	Bacteria	Proteobacteria	Gammaproteobacteria	Pseudomonadales	Pseudomonadaceae	Cellvibrio	2	RelA[hS], SpoT[HS]
Pseudomonas_aeruginosa	287	Bacteria	Proteobacteria	Gammaproteobacteria	Pseudomonadales	Pseudomonadaceae	Pseudomonas	3	pbcSpo2[H], RelA[hS], SpoT[HS]
Pseudomonas_aeruginosa_LESB58	557722	Bacteria	Proteobacteria	Gammaproteobacteria	Pseudomonadales	Pseudomonadaceae	Pseudomonas	3	pbcSpo2[H], RelA[hS], SpoT[HS]
Pseudomonas_aeruginosa_PA7	381754	Bacteria	Proteobacteria	Gammaproteobacteria	Pseudomonadales	Pseudomonadaceae	Pseudomonas	3	pbcSpo2[H], RelA[hS], SpoT[HS]
Pseudomonas_aeruginosa_UCBPP-PA14	208963	Bacteria	Proteobacteria	Gammaproteobacteria	Pseudomonadales	Pseudomonadaceae	Pseudomonas	3	pbcSpo2[H], RelA[hS], SpoT[HS]
Pseudomonas_entomophila_L48	384676	Bacteria	Proteobacteria	Gammaproteobacteria	Pseudomonadales	Pseudomonadaceae	Pseudomonas	3	pbcSpo[H], RelA[hS], SpoT[HS]
Pseudomonas_fluorescens_Pf-5	220664	Bacteria	Proteobacteria	Gammaproteobacteria	Pseudomonadales	Pseudomonadaceae	Pseudomonas	3	pbcSpo[H], RelA[hS], SpoT[HS]
Pseudomonas_fluorescens_Pf0_1	205922	Bacteria	Proteobacteria	Gammaproteobacteria	Pseudomonadales	Pseudomonadaceae	Pseudomonas	3	pbcSpo[H], RelA[hS], SpoT[HS]
Pseudomonas_fluorescens_SBW25	216595	Bacteria	Proteobacteria	Gammaproteobacteria	Pseudomonadales	Pseudomonadaceae	Pseudomonas	5	divRel[S], divRel[S], paSpo[H], RelA[hS], SpoT[HS]
Pseudomonas_mendocina_ymp	399739	Bacteria	Proteobacteria	Gammaproteobacteria	Pseudomonadales	Pseudomonadaceae	Pseudomonas	2	RelA[hS], SpoT[HS]
Pseudomonas_putida_F1	351746	Bacteria	Proteobacteria	Gammaproteobacteria	Pseudomonadales	Pseudomonadaceae	Pseudomonas	3	pbcSpo[H], RelA[hS], SpoT[HS]
Pseudomonas_putida_GB_1	76869	Bacteria	Proteobacteria	Gammaproteobacteria	Pseudomonadales	Pseudomonadaceae	Pseudomonas	3	pbcSpo[H], RelA[hS], SpoT[HS]
Pseudomonas_putida_KT2440	160488	Bacteria	Proteobacteria	Gammaproteobacteria	Pseudomonadales	Pseudomonadaceae	Pseudomonas	3	pbcSpo[H], RelA[hS], SpoT[HS]
Pseudomonas_putida_W619	390235	Bacteria	Proteobacteria	Gammaproteobacteria	Pseudomonadales	Pseudomonadaceae	Pseudomonas	3	pbcSpo[H], RelA[hS], SpoT[HS]
Pseudomonas_stutzeri_A1501	379731	Bacteria	Proteobacteria	Gammaproteobacteria	Pseudomonadales	Pseudomonadaceae	Pseudomonas	2	RelA[hS], SpoT[HS]
Pseudomonas_syringae_phaseolicola_1448A	286	Bacteria	Proteobacteria	Gammaproteobacteria	Pseudomonadales	Pseudomonadaceae	Pseudomonas	3	pbcSpo2[H], RelA[hS], SpoT[HS]
Pseudomonas_syringae_pv_B728a	286	Bacteria	Proteobacteria	Gammaproteobacteria	Pseudomonadales	Pseudomonadaceae	Pseudomonas	3	pbcSpo2[H], RelA[hS], SpoT[HS]
Pseudomonas_syringae_tomato_DC3000	286	Bacteria	Proteobacteria	Gammaproteobacteria	Pseudomonadales	Pseudomonadaceae	Pseudomonas	3	fpRel[S], RelA[hS], SpoT[HS]
Francisella_philomiragia_ATCC_25017	262	Bacteria	Proteobacteria	Gammaproteobacteria	Thiotrichales	Francisellaceae	Francisella	2	RelA[hS]†, SpoT[HS]
Francisella_tularensis_FSC_198	262	Bacteria	Proteobacteria	Gammaproteobacteria	Thiotrichales	Francisellaceae	Francisella	2	RelA[hS]†, SpoT[HS]
Francisella_tularensis_holarctica	262	Bacteria	Proteobacteria	Gammaproteobacteria	Thiotrichales	Francisellaceae	Francisella	2	RelA[hS]†, SpoT[HS]
Francisella_tularensis_holarctica_FTNF002_00	262	Bacteria	Proteobacteria	Gammaproteobacteria	Thiotrichales	Francisellaceae	Francisella	2	RelA[hS]†, SpoT[HS]
Francisella_tularensis_holarctica_OSU18	262	Bacteria	Proteobacteria	Gammaproteobacteria	Thiotrichales	Francisellaceae	Francisella	2	RelA[hS]†, SpoT[HS]
Francisella_tularensis_mediasiatica_FSC147	262	Bacteria	Proteobacteria	Gammaproteobacteria	Thiotrichales	Francisellaceae	Francisella	2	RelA[hS]†, SpoT[HS]
Francisella_tularensis_novicida_U112	262	Bacteria	Proteobacteria	Gammaproteobacteria	Thiotrichales	Francisellaceae	Francisella	2	RelA[hS]†, SpoT[HS]
Francisella_tularensis_tularensis	262	Bacteria	Proteobacteria	Gammaproteobacteria	Thiotrichales	Francisellaceae	Francisella	2	RelA[hS]†, SpoT[HS]
Francisella_tularensis_WY96-3418	262	Bacteria	Proteobacteria	Gammaproteobacteria	Thiotrichales	Francisellaceae	Francisella	2	RelA[hS]†, SpoT[HS]
Thiomicrospira_crunogena_XCL-2	317025	Bacteria	Proteobacteria	Gammaproteobacteria	Thiotrichales	Piscirickettsiaceae	Thiomicrospira	2	RelA[hS]†, SpoT[HS]
Aliivibrio_salmonicida_LFI1238	316275	Bacteria	Proteobacteria	Gammaproteobacteria	Vibrionales	Vibrionaceae	Aliivibrio	3	RelV[S], RelA[hS], SpoT[HS]
Photobacterium_profundum_SS9	298386	Bacteria	Proteobacteria	Gammaproteobacteria	Vibrionales	Vibrionaceae	Photobacterium	5	RelV[S], RelV[S], divSpo[H], RelA[hS], SpoT[HS]
Vibrio_cholerae	666	Bacteria	Proteobacteria	Gammaproteobacteria	Vibrionales	Vibrionaceae	Vibrio	3	RelV[S], RelA[hS], SpoT[HS]
Vibrio_cholerae_M66_2	579112	Bacteria	Proteobacteria	Gammaproteobacteria	Vibrionales	Vibrionaceae	Vibrio	3	RelV[S], RelA[hS], SpoT[HS]
Vibrio_cholerae_MJ_1236	593588	Bacteria	Proteobacteria	Gammaproteobacteria	Vibrionales	Vibrionaceae	Vibrio	3	RelV[S], RelA[hS], SpoT[HS]
Vibrio_cholerae_O395	345073	Bacteria	Proteobacteria	Gammaproteobacteria	Vibrionales	Vibrionaceae	Vibrio	3	RelV[S], RelA[hS], SpoT[HS]
Vibrio_Ex25	662	Bacteria	Proteobacteria	Gammaproteobacteria	Vibrionales	Vibrionaceae	Vibrio	3	RelV[S], RelA[hS], SpoT[HS]
Vibrio_fischeri_ES114	312309	Bacteria	Proteobacteria	Gammaproteobacteria	Vibrionales	Vibrionaceae	Aliivibrio	3	RelV[S], RelA[hS], SpoT[HS]
Vibrio_fischeri_MJ11	388396	Bacteria	Proteobacteria	Gammaproteobacteria	Vibrionales	Vibrionaceae	Aliivibrio	3	RelV[S], RelA[hS], SpoT[HS]
Vibrio_harveyi_ATCC_BAA-1116	338187	Bacteria	Proteobacteria	Gammaproteobacteria	Vibrionales	Vibrionaceae	Vibrio	3	RelV[S], RelA[hS], SpoT[HS]
Vibrio_parahaemolyticus	670	Bacteria	Proteobacteria	Gammaproteobacteria	Vibrionales	Vibrionaceae	Vibrio	3	RelV[S], RelA[hS], SpoT[HS]
Vibrio_splendidus_LGP32	575788	Bacteria	Proteobacteria	Gammaproteobacteria	Vibrionales	Vibrionaceae	Vibrio	3	RelV[S], RelA[hS], SpoT[HS]
Vibrio_vulnificus_CMCP6	216895	Bacteria	Proteobacteria	Gammaproteobacteria	Vibrionales	Vibrionaceae	Vibrio	4	divRel[S], RelV[S], RelA[hS], SpoT[HS]
Vibrio_vulnificus_YJ016	196600	Bacteria	Proteobacteria	Gammaproteobacteria	Vibrionales	Vibrionaceae	Vibrio	4	RelV[S], RelA[hS], capRel[S], SpoT[HS]
Stenotrophomonas_maltophilia_K279a	522373	Bacteria	Proteobacteria	Gammaproteobacteria	Xanthomonadales	Xanthomonadaceae	Stenotrophomonas	3	RelA[hS], SpoT[HS], pbcSpo[H]
Stenotrophomonas_maltophilia_R551_3	391008	Bacteria	Proteobacteria	Gammaproteobacteria	Xanthomonadales	Xanthomonadaceae	Stenotrophomonas	2	RelA[hS], SpoT[HS]
Xanthomonas_campestris_8004	338	Bacteria	Proteobacteria	Gammaproteobacteria	Xanthomonadales	Xanthomonadaceae	Xanthomonas	3	Mesh1-L[H], RelA[hS], SpoT[HS]
Xanthomonas_campestris_ATCC_33913	338	Bacteria	Proteobacteria	Gammaproteobacteria	Xanthomonadales	Xanthomonadaceae	Xanthomonas	3	Mesh1-L[H], RelA[hS], SpoT[HS]
Xanthomonas_campestris_B100	338	Bacteria	Proteobacteria	Gammaproteobacteria	Xanthomonadales	Xanthomonadaceae	Xanthomonas	3	Mesh1-L[H], RelA[hS], SpoT[HS]
Xanthomonas_campestris_vesicatoria_85-10	338	Bacteria	Proteobacteria	Gammaproteobacteria	Xanthomonadales	Xanthomonadaceae	Xanthomonas	3	Mesh1-L[H], RelA[hS], SpoT[HS]
Xanthomonas_citri	346	Bacteria	Proteobacteria	Gammaproteobacteria	Xanthomonadales	Xanthomonadaceae	Xanthomonas	3	Mesh1-L[H], RelA[hS], SpoT[HS]
Xanthomonas_oryzae_KACC10331	338	Bacteria	Proteobacteria	Gammaproteobacteria	Xanthomonadales	Xanthomonadaceae	Xanthomonas	2	RelA[hS], SpoT[HS]
Xanthomonas_oryzae_MAFF_311018	338	Bacteria	Proteobacteria	Gammaproteobacteria	Xanthomonadales	Xanthomonadaceae	Xanthomonas	2	RelA[hS], SpoT[HS]
Xanthomonas_oryzae_PXO99A	338	Bacteria	Proteobacteria	Gammaproteobacteria	Xanthomonadales	Xanthomonadaceae	Xanthomonas	2	RelA[hS], SpoT[HS]
Xylella_fastidiosa	2371	Bacteria	Proteobacteria	Gammaproteobacteria	Xanthomonadales	Xanthomonadaceae	Xylella	2	RelA[hS], SpoT[HS]
Xylella_fastidiosa_M12	405440	Bacteria	Proteobacteria	Gammaproteobacteria	Xanthomonadales	Xanthomonadaceae	Xylella	2	RelA[hS], SpoT[HS]
Xylella_fastidiosa_M23	405441	Bacteria	Proteobacteria	Gammaproteobacteria	Xanthomonadales	Xanthomonadaceae	Xylella	2	RelA[hS], SpoT[HS]
Xylella_fastidiosa_Temecula1	183190	Bacteria	Proteobacteria	Gammaproteobacteria	Xanthomonadales	Xanthomonadaceae	Xylella	2	RelA[hS], SpoT[HS]
Magnetococcus_MC-1	162171	Bacteria	Proteobacteria	no info	no info	no info	Magnetococcus	4	divRel[S], Rel[HS], RshD[HS], pbcSpo[H]
Brachyspira_hyodysenteriae_WA1	565034	Bacteria	Spirochaetes	Spirochaetes (class)	Spirochaetales	Brachyspiraceae	Brachyspira	0
Leptospira_biflexa_serovar_Patoc__Patoc_1__Ames_	171	Bacteria	Spirochaetes	Spirochaetes (class)	Spirochaetales	Leptospiraceae	Leptospira	1	Rel[HS]
Leptospira_biflexa_serovar_Patoc__Patoc_1__Paris_	171	Bacteria	Spirochaetes	Spirochaetes (class)	Spirochaetales	Leptospiraceae	Leptospira	0	*(Rel[HS])
Leptospira_borgpetersenii_serovar_Hardjo-bovis_JB197	355277	Bacteria	Spirochaetes	Spirochaetes (class)	Spirochaetales	Leptospiraceae	Leptospira	1	Rel[HS]
Leptospira_borgpetersenii_serovar_Hardjo-bovis_L550	355276	Bacteria	Spirochaetes	Spirochaetes (class)	Spirochaetales	Leptospiraceae	Leptospira	1	Rel[HS]
Leptospira_interrogans_serovar_Copenhageni	44275	Bacteria	Spirochaetes	Spirochaetes (class)	Spirochaetales	Leptospiraceae	Leptospira	1	Rel[HS]
Leptospira_interrogans_serovar_Lai	57678	Bacteria	Spirochaetes	Spirochaetes (class)	Spirochaetales	Leptospiraceae	Leptospira	1	Rel[HS]
Borrelia_afzelii_PKo	390236	Bacteria	Spirochaetes	Spirochaetes (class)	Spirochaetales	Spirochaetaceae	Borrelia	1	Rel[HS]
Borrelia_burgdorferi	139	Bacteria	Spirochaetes	Spirochaetes (class)	Spirochaetales	Spirochaetaceae	Borrelia	1	Rel[HS]
Borrelia_burgdorferi_ZS7	445985	Bacteria	Spirochaetes	Spirochaetes (class)	Spirochaetales	Spirochaetaceae	Borrelia	1	Rel[HS]
Borrelia_duttonii_Ly	412419	Bacteria	Spirochaetes	Spirochaetes (class)	Spirochaetales	Spirochaetaceae	Borrelia	1	Rel[HS]
Borrelia_garinii_PBi	290434	Bacteria	Spirochaetes	Spirochaetes (class)	Spirochaetales	Spirochaetaceae	Borrelia	1	Rel[HS]
Borrelia_hermsii_DAH	314723	Bacteria	Spirochaetes	Spirochaetes (class)	Spirochaetales	Spirochaetaceae	Borrelia	1	Rel[HS]
Borrelia_recurrentis_A1	412418	Bacteria	Spirochaetes	Spirochaetes (class)	Spirochaetales	Spirochaetaceae	Borrelia	1	Rel[HS]
Borrelia_turicatae_91E135	314724	Bacteria	Spirochaetes	Spirochaetes (class)	Spirochaetales	Spirochaetaceae	Borrelia	1	Rel[HS]
Treponema_denticola_ATCC_35405	243275	Bacteria	Spirochaetes	Spirochaetes (class)	Spirochaetales	Spirochaetaceae	Treponema	2	divRel[S], Rel[H]
Treponema_pallidum	160	Bacteria	Spirochaetes	Spirochaetes (class)	Spirochaetales	Spirochaetaceae	Treponema	0
Treponema_pallidum_SS14	157	Bacteria	Spirochaetes	Spirochaetes (class)	Spirochaetales	Spirochaetaceae	Treponema	0
Acholeplasma_laidlawii_PG_8A	441768	Bacteria	Tenericutes	Mollicutes	Acholeplasmatales	Acholeplasmataceae	Acholeplasma	1	Rel[HS]
Aster_yellows_witches-broom_phytoplasma_AYWB	322098	Bacteria	Tenericutes	Mollicutes	Acholeplasmatales	Acholeplasmataceae	Candidatus Phytoplasma	1	Rel[HS]
Candidatus_Phytoplasma_australiense	59748	Bacteria	Tenericutes	Mollicutes	Acholeplasmatales	Acholeplasmataceae	Candidatus Phytoplasma	1	Rel[HS]
Candidatus_Phytoplasma_mali	37692	Bacteria	Tenericutes	Mollicutes	Acholeplasmatales	Acholeplasmataceae	Candidatus Phytoplasma	1	Rel[HS]
Onion_yellows_phytoplasma	100379	Bacteria	Tenericutes	Mollicutes	Acholeplasmatales	Acholeplasmataceae	Candidatus Phytoplasma	1	Rel[HS]
Mesoplasma_florum_L1	265311	Bacteria	Tenericutes	Mollicutes	Entomoplasmatales	Entomoplasmataceae	Mesoplasma	1	Rel[HS]
Mycoplasma_agalactiae_PG2	347257	Bacteria	Tenericutes	Mollicutes	Mycoplasmatales	Mycoplasmataceae	Mycoplasma	0
Mycoplasma_arthritidis_158L3_1	243272	Bacteria	Tenericutes	Mollicutes	Mycoplasmatales	Mycoplasmataceae	Mycoplasma	0
Mycoplasma_capricolum_ATCC_27343	2093	Bacteria	Tenericutes	Mollicutes	Mycoplasmatales	Mycoplasmataceae	Mycoplasma	1	Rel[HS]
Mycoplasma_conjunctivae	45361	Bacteria	Tenericutes	Mollicutes	Mycoplasmatales	Mycoplasmataceae	Mycoplasma	0
Mycoplasma_gallisepticum	2096	Bacteria	Tenericutes	Mollicutes	Mycoplasmatales	Mycoplasmataceae	Mycoplasma	1	Rel[HS]
Mycoplasma_genitalium	2097	Bacteria	Tenericutes	Mollicutes	Mycoplasmatales	Mycoplasmataceae	Mycoplasma	1	Rel[HS]
Mycoplasma_hyopneumoniae_232	295358	Bacteria	Tenericutes	Mollicutes	Mycoplasmatales	Mycoplasmataceae	Mycoplasma	0
Mycoplasma_hyopneumoniae_7448	262722	Bacteria	Tenericutes	Mollicutes	Mycoplasmatales	Mycoplasmataceae	Mycoplasma	0
Mycoplasma_hyopneumoniae_J	262719	Bacteria	Tenericutes	Mollicutes	Mycoplasmatales	Mycoplasmataceae	Mycoplasma	0
Mycoplasma_mobile_163K	267748	Bacteria	Tenericutes	Mollicutes	Mycoplasmatales	Mycoplasmataceae	Mycoplasma	0
Mycoplasma_mycoides	2102	Bacteria	Tenericutes	Mollicutes	Mycoplasmatales	Mycoplasmataceae	Mycoplasma	1	Rel[HS]
Mycoplasma_penetrans	28227	Bacteria	Tenericutes	Mollicutes	Mycoplasmatales	Mycoplasmataceae	Mycoplasma	1	Rel[HS]
Mycoplasma_pneumoniae	2104	Bacteria	Tenericutes	Mollicutes	Mycoplasmatales	Mycoplasmataceae	Mycoplasma	1	Rel[HS]
Mycoplasma_pulmonis	2107	Bacteria	Tenericutes	Mollicutes	Mycoplasmatales	Mycoplasmataceae	Mycoplasma	0
Mycoplasma_synoviae_53	262723	Bacteria	Tenericutes	Mollicutes	Mycoplasmatales	Mycoplasmataceae	Mycoplasma	0
Ureaplasma_parvum_serovar_3_ATCC_27815	2129	Bacteria	Tenericutes	Mollicutes	Mycoplasmatales	Mycoplasmataceae	Ureaplasma	1	Rel[HS]
Ureaplasma_urealyticum	2130	Bacteria	Tenericutes	Mollicutes	Mycoplasmatales	Mycoplasmataceae	Ureaplasma	1	Rel[HS]
Ureaplasma_urealyticum_serovar_10_ATCC_33699	2129	Bacteria	Tenericutes	Mollicutes	Mycoplasmatales	Mycoplasmataceae	Ureaplasma	1	Rel[HS]
Fervidobacterium_nodosum_Rt17-B1	381764	Bacteria	Thermotogae	Thermotogae (class)	Thermotogales	Thermotogaceae	Fervidobacterium	1	Rel[HS]
Kosmotoga_olearia_TBF_19_5_1	521045	Bacteria	Thermotogae	Thermotogae (class)	Thermotogales	Thermotogaceae	Kosmotoga	1	Rel[HS]
Petrotoga_mobilis_SJ95	403833	Bacteria	Thermotogae	Thermotogae (class)	Thermotogales	Thermotogaceae	Petrotoga	1	Rel[HS]
Thermosipho_africanus_TCF52B	484019	Bacteria	Thermotogae	Thermotogae (class)	Thermotogales	Thermotogaceae	Thermosipho	1	Rel[HS]
Thermosipho_melanesiensis_BI429	391009	Bacteria	Thermotogae	Thermotogae (class)	Thermotogales	Thermotogaceae	Thermosipho	1	Rel[HS]
Thermotoga_lettingae_TMO	416591	Bacteria	Thermotogae	Thermotogae (class)	Thermotogales	Thermotogaceae	Thermotoga	1	Rel[HS]
Thermotoga_maritima	2336	Bacteria	Thermotogae	Thermotogae (class)	Thermotogales	Thermotogaceae	Thermotoga	1	Rel[HS]
Thermotoga_neapolitana_DSM_4359	309803	Bacteria	Thermotogae	Thermotogae (class)	Thermotogales	Thermotogaceae	Thermotoga	1	Rel[HS]
Thermotoga_petrophila_RKU-1	390874	Bacteria	Thermotogae	Thermotogae (class)	Thermotogales	Thermotogaceae	Thermotoga	1	Rel[HS]
Thermotoga_RQ2	2335	Bacteria	Thermotogae	Thermotogae (class)	Thermotogales	Thermotogaceae	Thermotoga	1	Rel[HS]
Methylacidiphilum_infernorum_V4	481448	Bacteria	Verrucomicrobia	no info	Methylacidiphilales	Methylacidiphilaceae	Methylacidiphilum	0
Opitutus_terrae_PB90_1	452637	Bacteria	Verrucomicrobia	Opitutae	no info	Opitutaceae	Opitutus	0
Akkermansia_muciniphila_ATCC_BAA_835	349741	Bacteria	Verrucomicrobia	Verrucomicrobiae	Verrucomicrobiales	Verrucomicrobiaceae	Akkermansia	0
Helobdella_robusta	6412	Eukaryota	Annelida	Hirudinida	Rhynchobdellida	Glossiphoniidae	Helobdella	1	Mesh1[H]
Capitella_sp	51293	Eukaryota	Annelida	Polychaeta	Capitellida	Capitellidae	Capitella	3	Mesh1[H], RelA[H], SpoT[S]
Plasmodium_falciparum	5833	Eukaryota	Apicomplexa	Aconoidasida	Haemosporida	no info	Plasmodium	0
Theileria_parva	5875	Eukaryota	Apicomplexa	Aconoidasida	no info	Theileriidae	Theileria	0
Cryptosporidium_parvum	5807	Eukaryota	Apicomplexa	Coccidia	Eucoccidiorida	Cryptosporidiidae	Cryptosporidium	0
Daphnia_pulex	6669	Eukaryota	Arthropoda	Branchiopoda	Diplostraca	Daphniidae	Daphnia	1	Mesh1[H]
Anopheles_gambiae	7165	Eukaryota	Arthropoda	Insecta	Diptera	Culicidae	Anopheles	1	Mesh1[H]
Drosophila_melanogaster	7227	Eukaryota	Arthropoda	Insecta	Diptera	Drosophilidae	Drosophila	1	Mesh1[H]
Cryptococcus_neoformans_var_JEC21	561281	Eukaryota	Ascomycota	Dothideomycetes	Capnodiales	Mycosphaerellaceae	Cryptococcus	1	Mesh1[H]
Cochliobolus_heterostrophus	5016	Eukaryota	Ascomycota	Dothideomycetes	Pleosporales	Pleosporaceae	Cochliobolus	0
Aspergillus_fumigatus	5085	Eukaryota	Ascomycota	Eurotiomycetes	Eurotiales	Trichocomaceae	Neosartorya	2	divRel[S], divRel[S]
Aspergillus_nidulans_FGSC_A4	227321	Eukaryota	Ascomycota	Eurotiomycetes	Eurotiales	Trichocomaceae	Emericella	1	divRel[S]
Aspergillus_niger	5061	Eukaryota	Ascomycota	Eurotiomycetes	Eurotiales	Trichocomaceae	Aspergillus	0
Debaryomyces_hansenii_CBS767	284592	Eukaryota	Ascomycota	Saccharomycetes	Saccharomycetales	Debaryomycetaceae	Debaryomyces	0
Pichia_stipitis	4924	Eukaryota	Ascomycota	Saccharomycetes	Saccharomycetales	Debaryomycetaceae	Scheffersomyces	0
Pichia_stipitis_CBS_6054	322104	Eukaryota	Ascomycota	Saccharomycetes	Saccharomycetales	Debaryomycetaceae	Scheffersomyces	0
Yarrowia_lipolytica_CLIB122	284591	Eukaryota	Ascomycota	Saccharomycetes	Saccharomycetales	Dipodascaceae	Yarrowia	0
Candida_albicans	5476	Eukaryota	Ascomycota	Saccharomycetes	Saccharomycetales	no info	Candida	0
Candida_dubliniensis_CD36	573826	Eukaryota	Ascomycota	Saccharomycetes	Saccharomycetales	no info	Candida	0
Candida_glabrata_CBS138	284593	Eukaryota	Ascomycota	Saccharomycetes	Saccharomycetales	Saccharomycetaceae	Nakaseomyces	0
Eremothecium_gossypii	33169	Eukaryota	Ascomycota	Saccharomycetes	Saccharomycetales	Saccharomycetaceae	Eremothecium	0
Kluyveromyces_lactis_NRRL_Y-1140	284590	Eukaryota	Ascomycota	Saccharomycetes	Saccharomycetales	Saccharomycetaceae	Kluyveromyces	0
Lachancea_thermotolerans_CBS_6340	559295	Eukaryota	Ascomycota	Saccharomycetes	Saccharomycetales	Saccharomycetaceae	Lachancea	0
Pichia_pastoris_GS115	644223	Eukaryota	Ascomycota	Saccharomycetes	Saccharomycetales	Saccharomycetaceae	Pichia	0
Saccharomyces_cerevisiae	4932	Eukaryota	Ascomycota	Saccharomycetes	Saccharomycetales	Saccharomycetaceae	Saccharomyces	0
Zygosaccharomyces_rouxii_CBS_732	559307	Eukaryota	Ascomycota	Saccharomycetes	Saccharomycetales	Saccharomycetaceae	Zygosaccharomyces	0
Schizosaccharomyces_pombe	4896	Eukaryota	Ascomycota	Schizosaccharomycetes	Schizosaccharomycetales	Schizosaccharomycetaceae	Schizosaccharomyces	0
Gibberella_zeae	5518	Eukaryota	Ascomycota	Sordariomycetes	Hypocreales	Nectriaceae	Gibberella	3	divRel[S], divRel[S], divRel[S]
Gibberella_zeae_PH-1	229533	Eukaryota	Ascomycota	Sordariomycetes	Hypocreales	Nectriaceae	Gibberella	3	divRel[S], divRel[S], divRel[S]
Magnaporthe_grisea_70-15	242507	Eukaryota	Ascomycota	Sordariomycetes	Magnaporthales	Magnaporthaceae	Magnaporthe	0
Neurospora_crassa	5141	Eukaryota	Ascomycota	Sordariomycetes	Sordariales	Sordariaceae	Neurospora	0
Phaeodactylum_tricornutum	2850	Eukaryota	Bacillariophyta	Bacillariophyceae	Naviculales	Phaeodactylaceae	Phaeodactylum	3	divRel[S], Rsh1[HS], Rsh1[S]
Thalassiosira_pseudonana	35128	Eukaryota	Bacillariophyta	Coscinodiscophyceae	no info	Thalassiosiraceae	Thalassiosira	4	Rel[HS], Rsh1[HS], Rsh1[S], Rsh1[S]
Laccaria_bicolor	29883	Eukaryota	Basidiomycota	Agaricomycetes	Agaricales	Tricholomataceae	Laccaria	0
Ustilago_maydis	5270	Eukaryota	Basidiomycota	Ustilaginomycetes	Ustilaginales	Ustilaginaceae	Ustilago	0
Chlamydomonas_reinhardtii	3055	Eukaryota	Chlorophyta	Chlorophyceae	Chlamydomonadales	Chlamydomonadaceae	Chlamydomonas	2	Rsh2[HS], Rsh4[S]
Volvox_carteri	3067	Eukaryota	Chlorophyta	Chlorophyceae	Chlamydomonadales	Volvocaceae	Volvox	2	Rsh2[HS], Rsh4[HS]
Ostreococcus_lucimarinus	242159	Eukaryota	Chlorophyta	Prasinophyceae	Mamiellales	no info	Ostreococcus	4	Rsh1[HS], Rsh2[HS], Rsh3[HS], Rsh4[HS]
Ostreococcus_sp	70447	Eukaryota	Chlorophyta	Prasinophyceae	Mamiellales	no info	Ostreococcus	4	Rsh1[HS], Rsh2[HS], Rsh3[HS], Rsh4[S]
Ostreococcus_tauri	70448	Eukaryota	Chlorophyta	Prasinophyceae	Mamiellales	no info	Ostreococcus	4	Rsh1[HS], Rsh2[HS], Rsh3[HS], Rsh4[HS]
Chlorella_sp	3079	Eukaryota	Chlorophyta	Trebouxiophyceae	Chlorellales	Chlorellaceae	Chlorella	4	Rsh1[HS], Rsh2[H], Rsh3[HS], Rsh4[S]
Chlorella_vulgaris	3077	Eukaryota	Chlorophyta	Trebouxiophyceae	Chlorellales	Chlorellaceae	Chlorella	3	Rsh1[HS], Rsh2[HS], Rsh3[HS]
Danio_rerio	7955	Eukaryota	Chordata	Actinopterygii	Cypriniformes	Cyprinidae	Danio	1	Mesh1[H]
Monodelphis_domestica	13616	Eukaryota	Chordata	Mammalia	Didelphimorphia	Didelphidae	Monodelphis	1	Mesh1[H]
Homo_sapiens	9606	Eukaryota	Chordata	Mammalia	Primates	Hominidae	Homo	1	Mesh1[H]
Branchiostoma_floridae	7739	Eukaryota	Chordata	no info	no info	Branchiostomidae	Branchiostoma	2	Mesh1[H], Mesh1[H]
Batrachochytrium_dendrobatidis	109871	Eukaryota	Chytridiomycota	Chytridiomycetes	Chytridiales	no info	Batrachochytrium	1	Mesh1[H]
Nematostella_vectensis	45351	Eukaryota	Cnidaria	Anthozoa	Actiniaria	Edwardsiidae	Nematostella	0
Strongylocentrotus_purpuratus	7668	Eukaryota	Echinodermata	Echinoidea	Echinoida	Strongylocentrotidae	Strongylocentrotus	2	Mesh1[H], Mesh1[H]
Encephalitozoon_cuniculi	6035	Eukaryota	Microsporidia	no info	no info	Unikaryonidae	Encephalitozoon	0
Lottia_gigantea	225164	Eukaryota	Mollusca	Gastropoda	Docoglossa	Lottiidae	Lottia	1	Mesh1[H]
Caenorhabditis_elegans	6239	Eukaryota	Nematoda	Chromadorea	Rhabditida	Rhabditidae	Caenorhabditis	1	Mesh1[H]
Cyanidioschyzon_merolae	45157	Eukaryota	no info	Bangiophyceae	Cyanidiales	Cyanidiaceae	Cyanidioschyzon	4	divRel[HS], Rsh1[HS], Rsh1[HS], Rsh4[HS]
Naegleria_gruberi	5762	Eukaryota	no info	Heterolobosea	Schizopyrenida	Vahlkampfiidae	Naegleria	0
Monosiga_brevicollis	81824	Eukaryota	no info	no info	Choanoflagellida	Codonosigidae	Monosiga	1	Mesh1[H]
Dictyostelium_discoideum	44689	Eukaryota	no info	no info	Dictyosteliida	no info	Dictyostelium	3	divRel[S], divRel[S], Mesh1[H]
Dictyostelium_purpureum	5786	Eukaryota	no info	no info	Dictyosteliida	no info	Dictyostelium	3	divRel[S], divRel[S], Mesh1[H]
Emiliania_huxleyi	2903	Eukaryota	no info	no info	Isochrysidales	Noelaerhabdaceae	Emiliania	8	Rel[HS], divSpo[H], Rsh1[HS], Rsh1[HS], Rsh1[HS], Rsh1[HS], Rsh4[S], Rsh4[S]
Leishmania_infantum	5671	Eukaryota	no info	no info	Kinetoplastida	Trypanosomatidae	Leishmania	0
Leishmania_major	5664	Eukaryota	no info	no info	Kinetoplastida	Trypanosomatidae	Leishmania	0
Trypanosoma_brucei	5691	Eukaryota	no info	no info	Kinetoplastida	Trypanosomatidae	Trypanosoma	0
Phycomyces_blakesleeanus	4837	Eukaryota	no info	no info	Mucorales	Mucoraceae	Phycomyces	0
Rhizopus_oryzae	64495	Eukaryota	no info	no info	Mucorales	Mucoraceae	Rhizopus	0
Giardia_lamblia	5741	Eukaryota	no info	no info	no info	Hexamitidae	Giardia	0
Entamoeba_histolytica	5759	Eukaryota	no info	no info	no info	no info	Entamoeba	1	Mesh1[H]
Phytophthora_ramorum	164328	Eukaryota	no info	no info	Peronosporales	no info	Phytophthora	0
Trichomonas_vaginalis	5722	Eukaryota	no info	no info	Trichomonadida	Trichomonadidae	Trichomonas	0
Tetrahymena_thermophila	5911	Eukaryota	no info	Oligohymenophorea	Hymenostomatida	Tetrahymenidae	Tetrahymena	0
Paramecium_tetraurelia	5888	Eukaryota	no info	Oligohymenophorea	Peniculida	Parameciidae	Paramecium	0
Aureococcus_anophagefferens	44056	Eukaryota	no info	Pelagophyceae	no info	no info	Aureococcus	5	divSpo[H], Rsh1[HS], Rsh1[HS], Rsh1[HS], Rsh1[H]
Physcomitrella_patens	3218	Eukaryota	Streptophyta	Bryopsida	Funariales	Funariaceae	Physcomitrella	0
Selaginella_moellendorffii	88036	Eukaryota	Streptophyta	Isoetopsida	Selaginellales	Selaginellaceae	Selaginella	8	Rsh1[HS], Rsh1[HS], Rsh2[HS], Rsh2[HS], Rsh3[HS], Rsh3[HS], Rsh4[HS], Rsh4[HS]
Oryza_sativa	4530	Eukaryota	Streptophyta	Liliopsida	Poales	Poaceae	Oryza	7	Rsh1[HS], Rsh2[HS], Rsh2[HS], Rsh2[HS], Rsh3[HS], Rsh4[HS], Rsh4[HS]
Arabidopsis_thaliana	3702	Eukaryota	Streptophyta	no info	Brassicales	Brassicaceae	Arabidopsis	4	Rsh1[HS], Rsh2[HS], Rsh2[HS], Rsh4[HS]
Populus_trichocarpa	3694	Eukaryota	Streptophyta	no info	Malpighiales	Salicaceae	Populus	9	Rsh1[HS], Rsh2[HS], Rsh2[HS], Rsh2[HS], Rsh2[S], Rsh3[H], Rsh3[H], Rsh4[HS], SpoT[S]
vitis_vinifera	29760	Eukaryota	Streptophyta	no info	Vitales	Vitaceae	Vitis	4	Rsh1[HS], Rsh2[HS], Rsh3[HS], Rsh4[HS]
Aeropyrum_pernix	56636	Archaea	Crenarchaeota	Thermoprotei	Desulfurococcales	Desulfurococcaceae	Aeropyrum	0
Desulfurococcus_kamchatkensis_1221n	490899	Archaea	Crenarchaeota	Thermoprotei	Desulfurococcales	Desulfurococcaceae	Desulfurococcus	0
Ignicoccus_hospitalis_KIN4_I	54258	Archaea	Crenarchaeota	Thermoprotei	Desulfurococcales	Desulfurococcaceae	Ignicoccus	0
Staphylothermus_marinus_F1	399550	Archaea	Crenarchaeota	Thermoprotei	Desulfurococcales	Desulfurococcaceae	Staphylothermus	0
Hyperthermus_butylicus	54248	Archaea	Crenarchaeota	Thermoprotei	Desulfurococcales	Pyrodictiaceae	Hyperthermus	0
Metallosphaera_sedula_DSM_5348	399549	Archaea	Crenarchaeota	Thermoprotei	Sulfolobales	Sulfolobaceae	Metallosphaera	0
Sulfolobus_acidocaldarius_DSM_639	330779	Archaea	Crenarchaeota	Thermoprotei	Sulfolobales	Sulfolobaceae	Sulfolobus	0
Sulfolobus_islandicus_L_S_2_15	429572	Archaea	Crenarchaeota	Thermoprotei	Sulfolobales	Sulfolobaceae	Sulfolobus	0
Sulfolobus_islandicus_M_14_25	427317	Archaea	Crenarchaeota	Thermoprotei	Sulfolobales	Sulfolobaceae	Sulfolobus	0
Sulfolobus_islandicus_M_16_27	427318	Archaea	Crenarchaeota	Thermoprotei	Sulfolobales	Sulfolobaceae	Sulfolobus	0
Sulfolobus_islandicus_M_16_4	426118	Archaea	Crenarchaeota	Thermoprotei	Sulfolobales	Sulfolobaceae	Sulfolobus	0
Sulfolobus_islandicus_Y_G_57_14	439386	Archaea	Crenarchaeota	Thermoprotei	Sulfolobales	Sulfolobaceae	Sulfolobus	0
Sulfolobus_islandicus_Y_N_15_51	419942	Archaea	Crenarchaeota	Thermoprotei	Sulfolobales	Sulfolobaceae	Sulfolobus	0
Sulfolobus_solfataricus	2287	Archaea	Crenarchaeota	Thermoprotei	Sulfolobales	Sulfolobaceae	Sulfolobus	0
Sulfolobus_tokodaii	111955	Archaea	Crenarchaeota	Thermoprotei	Sulfolobales	Sulfolobaceae	Sulfolobus	0
Thermofilum_pendens_Hrk_5	368408	Archaea	Crenarchaeota	Thermoprotei	Thermoproteales	Thermofilaceae	Thermofilum	0
Caldivirga_maquilingensis_IC-167	397948	Archaea	Crenarchaeota	Thermoprotei	Thermoproteales	Thermoproteaceae	Caldivirga	0
Pyrobaculum_aerophilum	13773	Archaea	Crenarchaeota	Thermoprotei	Thermoproteales	Thermoproteaceae	Pyrobaculum	0
Pyrobaculum_arsenaticum_DSM_13514	340102	Archaea	Crenarchaeota	Thermoprotei	Thermoproteales	Thermoproteaceae	Pyrobaculum	0
Pyrobaculum_calidifontis_JCM_11548	410359	Archaea	Crenarchaeota	Thermoprotei	Thermoproteales	Thermoproteaceae	Pyrobaculum	0
Pyrobaculum_islandicum_DSM_4184	384616	Archaea	Crenarchaeota	Thermoprotei	Thermoproteales	Thermoproteaceae	Pyrobaculum	0
Thermoproteus_neutrophilus_V24Sta	444157	Archaea	Crenarchaeota	Thermoprotei	Thermoproteales	Thermoproteaceae	Thermoproteus	0
Archaeoglobus_fulgidus	2234	Archaea	Euryarchaeota	Archaeoglobi	Archaeoglobales	Archaeoglobaceae	Archaeoglobus	0
Haloarcula_marismortui_ATCC_43049	272569	Archaea	Euryarchaeota	Halobacteria	Halobacteriales	Halobacteriaceae	Haloarcula	0
Halobacterium_salinarum_R1	478009	Archaea	Euryarchaeota	Halobacteria	Halobacteriales	Halobacteriaceae	Halobacterium	0
Halobacterium_sp	2243	Archaea	Euryarchaeota	Halobacteria	Halobacteriales	Halobacteriaceae	Halobacterium	0
Halomicrobium_mukohataei_DSM_12286	485914	Archaea	Euryarchaeota	Halobacteria	Halobacteriales	Halobacteriaceae	Halomicrobium	0
Haloquadratum_walsbyi	293091	Archaea	Euryarchaeota	Halobacteria	Halobacteriales	Halobacteriaceae	Haloquadratum	0
Halorhabdus_utahensis_DSM_12940	519442	Archaea	Euryarchaeota	Halobacteria	Halobacteriales	Halobacteriaceae	Halorhabdus	0
Halorubrum_lacusprofundi_ATCC_49239	416348	Archaea	Euryarchaeota	Halobacteria	Halobacteriales	Halobacteriaceae	Halorubrum	0
Natronomonas_pharaonis	2257	Archaea	Euryarchaeota	Halobacteria	Halobacteriales	Halobacteriaceae	Natronomonas	1	pbcSpo[H]
Methanobacterium_thermoautotrophicum	145262	Archaea	Euryarchaeota	Methanobacteria	Methanobacteriales	Methanobacteriaceae	Methanothermobacter	0
Methanobrevibacter_smithii_ATCC_35061	420247	Archaea	Euryarchaeota	Methanobacteria	Methanobacteriales	Methanobacteriaceae	Methanobrevibacter	0
Methanosphaera_stadtmanae	2317	Archaea	Euryarchaeota	Methanobacteria	Methanobacteriales	Methanobacteriaceae	Methanosphaera	0
Methanocaldococcus_fervens_AG86	573064	Archaea	Euryarchaeota	Methanococci	Methanococcales	Methanocaldococcaceae	Methanocaldococcus	0
Methanocaldococcus_vulcanius_M7	579137	Archaea	Euryarchaeota	Methanococci	Methanococcales	Methanocaldococcaceae	Methanocaldococcus	0
Methanococcus_jannaschii	2190	Archaea	Euryarchaeota	Methanococci	Methanococcales	Methanocaldococcaceae	Methanocaldococcus	0
Methanococcus_aeolicus_Nankai-3	419665	Archaea	Euryarchaeota	Methanococci	Methanococcales	Methanococcaceae	Methanococcus	0
Methanococcus_maripaludis_C5	402880	Archaea	Euryarchaeota	Methanococci	Methanococcales	Methanococcaceae	Methanococcus	0
Methanococcus_maripaludis_C6	444158	Archaea	Euryarchaeota	Methanococci	Methanococcales	Methanococcaceae	Methanococcus	0
Methanococcus_maripaludis_C7	426368	Archaea	Euryarchaeota	Methanococci	Methanococcales	Methanococcaceae	Methanococcus	0
Methanococcus_maripaludis_S2	267377	Archaea	Euryarchaeota	Methanococci	Methanococcales	Methanococcaceae	Methanococcus	0
Methanococcus_vannielii_SB	406327	Archaea	Euryarchaeota	Methanococci	Methanococcales	Methanococcaceae	Methanococcus	0
Methanocorpusculum_labreanum_Z	410358	Archaea	Euryarchaeota	Methanomicrobia	Methanomicrobiales	Methanocorpusculaceae	Methanocorpusculum	0
Methanoculleus_marisnigri_JR1	368407	Archaea	Euryarchaeota	Methanomicrobia	Methanomicrobiales	Methanomicrobiaceae	Methanoculleus	0
Methanospirillum_hungatei_JF-1	323259	Archaea	Euryarchaeota	Methanomicrobia	Methanomicrobiales	Methanospirillaceae	Methanospirillum	0
Candidatus_Methanoregula_boonei_6A8	456442	Archaea	Euryarchaeota	Methanomicrobia	Methanomicrobiales	no info	Candidatus Methanoregula	0
Candidatus_Methanosphaerula_palustris_E1_9c	521011	Archaea	Euryarchaeota	Methanomicrobia	Methanomicrobiales	no info	Methanosphaerula	0
Methanosaeta_thermophila_PT	349307	Archaea	Euryarchaeota	Methanomicrobia	Methanosarcinales	Methanosaetaceae	Methanosaeta	0
Methanococcoides_burtonii_DSM_6242	259564	Archaea	Euryarchaeota	Methanomicrobia	Methanosarcinales	Methanosarcinaceae	Methanococcoides	1	Mesh1-L[H]
Methanosarcina_acetivorans	2214	Archaea	Euryarchaeota	Methanomicrobia	Methanosarcinales	Methanosarcinaceae	Methanosarcina	1	divRel[S]
Methanosarcina_barkeri_fusaro	269797	Archaea	Euryarchaeota	Methanomicrobia	Methanosarcinales	Methanosarcinaceae	Methanosarcina	1	divSpo[H]
Methanosarcina_mazei	2209	Archaea	Euryarchaeota	Methanomicrobia	Methanosarcinales	Methanosarcinaceae	Methanosarcina	0
Methanopyrus_kandleri	2320	Archaea	Euryarchaeota	Methanopyri	Methanopyrales	Methanopyraceae	Methanopyrus	0
uncultured_methanogenic_archaeon_RC-I	351160	Archaea	Euryarchaeota	no info	no info	no info	uncultured methanogenic archaeon	1	pbcSpo[H]
Pyrococcus_abyssi	29292	Archaea	Euryarchaeota	Thermococci	Thermococcales	Thermococcaceae	Pyrococcus	0
Pyrococcus_furiosus	2261	Archaea	Euryarchaeota	Thermococci	Thermococcales	Thermococcaceae	Pyrococcus	0
Pyrococcus_horikoshii	53953	Archaea	Euryarchaeota	Thermococci	Thermococcales	Thermococcaceae	Pyrococcus	0
Thermococcus_gammatolerans_EJ3	593117	Archaea	Euryarchaeota	Thermococci	Thermococcales	Thermococcaceae	Thermococcus	0
Thermococcus_kodakaraensis_KOD1	69014	Archaea	Euryarchaeota	Thermococci	Thermococcales	Thermococcaceae	Thermococcus	0
Thermococcus_onnurineus_NA1	523850	Archaea	Euryarchaeota	Thermococci	Thermococcales	Thermococcaceae	Thermococcus	0
Thermococcus_sibiricus_MM_739	604354	Archaea	Euryarchaeota	Thermococci	Thermococcales	Thermococcaceae	Thermococcus	0
Picrophilus_torridus_DSM_9790	263820	Archaea	Euryarchaeota	Thermoplasmata	Thermoplasmatales	Picrophilaceae	Picrophilus	0
Thermoplasma_acidophilum	2303	Archaea	Euryarchaeota	Thermoplasmata	Thermoplasmatales	Thermoplasmataceae	Thermoplasma	0
Thermoplasma_volcanium	50339	Archaea	Euryarchaeota	Thermoplasmata	Thermoplasmatales	Thermoplasmataceae	Thermoplasma	0
Candidatus_Korarchaeum_cryptofilum_OPF8	374847	Archaea	Korarchaeota	no info	no info	no info	Candidatus Korarchaeum	0
Nanoarchaeum_equitans	160232	Archaea	Nanoarchaeota	no info	no info	no info	Nanoarchaeum	0
Nitrosopumilus_maritimus_SCM1	436308	Archaea	Thaumarchaeota	no info	Nitrosopumilales	Nitrosopumilaceae	Nitrosopumilus	0
*Disrupted RSH genes:
Leptospira biflexa serovar Patoc Paris Rel annotated as pseudogene due to internal stop codon
Actinobacillus pleuropneumoniae serovar 3 JL03 has a frameshift in its RelA gene
Escherichia coli K12 substr. DH10B carries a RelA gene with the "Rel1" IS2 insertion that disrupts the gene
Bordetella parapertussis RelA annotated as pseudogene due to internal stop codon
Lactobacillus reuteri DSM 20016 RelQ carries a frameshift
†Unusual CTD domain structures in Rel, RelA and SpoT predicted proteins:
Candidatus Amoebophilus asiaticus lacks helical, CC and ACT domains
Elusimicrobium minutum Rel lacks ACT domain
Haemophilus ducreyi SpoT lacks CC domain
Actinobacillus pleuropneumoniae strains lack SpoT CC domain
Francisellaceae RelAs lack ACT domain
Methylotenera mobilis RelA lacks ACT domain
Syntrophus aciditrophicus divergent second copy Rel lacks helical, CC and ACT domains
